# Supplementary material for: A stronger acceptor decreases the rates of charge transfer: ultrafast dynamics and on/off switching of charge separation in organometallic donor–bridge–acceptor systems
Source: Royal Society of Chemistry journal article supplement (doi:10.1039/d2sc06409j), 2023-01-01
Supplement: d2sc06409j1.pdf [file d2sc06409j1.pdf]

# A stronger acceptor decreases the rates of charge transfer: Ultrafast dynamics and on/off switching of charge separation in organometallic Donor-Bridge-Acceptor systems

Alexander J. Auty,<sup>a</sup> Paul A. Scattergood,<sup>b</sup> Theo Keane,<sup>a</sup> Tao Cheng,<sup>a</sup> Guanzhi Wu,<sup>a</sup> Heather Carson,<sup>a</sup> James Shipp,<sup>a</sup> Andrew Sadler,<sup>a</sup> Thomas Roseveare,<sup>a</sup> Igor V. Sazanovich,<sup>c</sup> Anthony J H M Meijer,<sup>a\*</sup> Dimitri Chekulaev,<sup>a</sup> Paul I. P. Elliot,<sup>b</sup> Mike Towrie,<sup>c</sup> Julia A. Weinsteina\*

## Supporting Information

### Synthesis, experimental and theoretical results, additional analysis of spectra, crystallographic data

#### Contents

|     |                                                                                                                                           |     |
|-----|-------------------------------------------------------------------------------------------------------------------------------------------|-----|
| 1   | Synthesis (General methods and synthetic procedures) .....                                                                                | 2   |
| 2   | Experimental results .....                                                                                                                | 6   |
| 2.1 | Emission spectroscopy .....                                                                                                               | 6   |
| 2.2 | Time-Resolved Broadband Fluorescence Upconversion (FLUP) of 1 and 2. ....                                                                 | 7   |
| 2.3 | Cyclic Voltammetry .....                                                                                                                  | 9   |
| 2.4 | UV-vis spectroelectrochemistry and comparison with late-time TA of 3 .....                                                                | 10  |
| 2.5 | Time-resolved Infrared Spectroscopy .....                                                                                                 | 11  |
| 2.6 | Transient absorption .....                                                                                                                | 18  |
| 2.7 | Nanosecond Flash Photolysis .....                                                                                                         | 19  |
| 2.8 | Summary of time constants .....                                                                                                           | 20  |
| 2.9 | Scheme S1. Comparison of energy level diagrams and timescales for compound 3, NDI-Pt-PTZ (left side) and its NAP analog, NAP-Pt-PTZ ..... | 21  |
| 3   | Further experimental information .....                                                                                                    | 22  |
| 4   | Theoretical results .....                                                                                                                 | 23  |
| 4.1 | Simulated electronic absorption spectra .....                                                                                             | 23  |
| 4.2 | Simulated vibrational absorption spectra .....                                                                                            | 24  |
| 4.3 | Density difference plots of the first 4 singlet excited states vs. the ground state in 1-3 .....                                          | 25  |
| 4.4 | Density difference plots on the lowest 4 triplet states relative to the ground state .....                                                | 26  |
| 4.5 | Experimental ground state and excited state vibrational spectra overlaid with calculated spectra, and electron density maps .....         | 27  |
| 5   | Additional computational details .....                                                                                                    | 28  |
| 6   | Crystallographic data .....                                                                                                               | 96  |
| 7   | References .....                                                                                                                          | 107 |

# 1 Synthesis (General methods and synthetic procedures)

## General methods

Dibromoisocyanuric acid<sup>1</sup>, Cl-Pt-PTZ<sup>2</sup>, Cl-Pt-Ph<sup>3,4</sup>, TMS-Pt-Cl<sup>5</sup> and *cis*-Pt(PBu<sub>3</sub>)<sub>2</sub>Cl<sub>2</sub><sup>2</sup> were prepared following previously reported procedures. All reagents were purchased from Acros Organics, Sigma-Aldrich and Fluorochem and used as received. Synthetic manipulations requiring an inert atmosphere were performed under dry N<sub>2</sub> using standard Schlenk line techniques. Deaeration of solvents was performed through vigorous bubbling with N<sub>2</sub> for a period of at least 15 mins. Dry tetrahydrofuran (THF), triethylamine (Et<sub>3</sub>N) and diisopropylamine (iPr<sub>2</sub>NH) were obtained from distillation over CaH<sub>2</sub> and stored under an N<sub>2</sub> atmosphere over 4Å molecular sieves. NMR spectra were recorded on Bruker Ascend 400 and 600 MHz spectrometers, with all chemical shifts being reported relative to the residual solvent signal (CHCl<sub>3</sub>, <sup>1</sup>H δ 7.26, <sup>13</sup>C δ 77.16; d<sub>6</sub>-acetone, <sup>1</sup>H δ 2.05, <sup>13</sup>C δ 29.84, 206.26). High resolution mass spectrometry was performed on an Agilent 6210 time-of-flight instrument with a dual electrospray ionisation source. Matrix Assisted Laser Desorption Ionisation (MALDI) mass spectra were obtained from a Bruker Reflex III instrument using a DCTB matrix. Solid state mass spectra were recorded on a Waters LCT Premier Solids Analysis Probe (ASAP) instrument.

## Synthesis of *N,N'*-bis-(*n*-octyl)-2-bromo-1,4,5,8-naphthalene diimide (2-Br-NDI)

1,4,5,8-Naphthalene tetracarboxylic dianhydride (8.66 g, 32.23 mmol) was added to concentrated H<sub>2</sub>SO<sub>4</sub> (170 ml) and heated to 85 °C. To the red-brown coloured solution was then added, portionwise over 20 minutes, dibromoisocyanuric acid (9.22 g, 32.1 mmol) and the reaction mixture then heated to 130 °C for a further 21 h. After cooling to r.t., the reaction solution was poured into ice-cold H<sub>2</sub>O (300 ml), upon which a bright yellow precipitate was observed. The solids were collected by filtration, washed thoroughly with water followed by a small portion of MeOH and dried *in vacuo*, giving crude 2-bromo-1,4,5,8-naphthalene tetracarboxylic dianhydride as a yellow powder (9.75 g) which was used immediately in the following step without further purification or characterisation.

The previously prepared 2-bromo-1,4,5,8-naphthalene tetracarboxylic dianhydride (9.75 g) deaerated glacial acetic acid (185 ml) and *n*-octylamine (19.0 ml, ρ = 0.78 g/ml, 114.7 mmol) were combined under an N<sub>2</sub> atmosphere and heated to 135 °C for 2 hours. The reaction mixture was then cooled to r.t. and poured into ice-cold H<sub>2</sub>O (300 ml). The resultant red-coloured precipitate was collected by filtration, washed thoroughly with H<sub>2</sub>O followed by a small portion of MeOH and dried *in vacuo*. The crude solids were re-suspended in 1:1 (v/v) CH<sub>2</sub>Cl<sub>2</sub> / petroleum ether (200 ml), stirred for 10 minutes and then collected by filtration. The solids were washed with hexane, dried *in vacuo* and then further purified by column chromatography (SiO<sub>2</sub>, 3:1 CH<sub>2</sub>Cl<sub>2</sub> / hexane). After removal of pink and yellow coloured bands, the product was collected from the third fraction, which after evaporation of the solvent yielded the title compound as off-white coloured solids. Yield (over two steps) = 2.24 g, 12 %. <sup>1</sup>H NMR (CDCl<sub>3</sub>, 400 MHz): 0.87 (t, *J* = 6.3 Hz, 6H), 1.20-1.48 (m, 20 H), 1.67-1.79 (m, 4H), 4.18 (q, *J* = 7.6 Hz, 4H), 8.76 (d, *J* = 7.6 Hz, 1H), 8.81 (d, *J* = 7.6 Hz, 1H), 8.92 (s, 1H). <sup>13</sup>C NMR (CDCl<sub>3</sub>, 101 MHz): 14.23, 22.77, 27.18, 27.28, 28.11, 28.15, 29.31, 29.35, 29.40, 29.42, 31.93, 41.26, 41.64, 124.05, 125.83, 126.12, 126.18, 126.97, 128.74, 128.79, 130.85, 131.80, 138.57, 161.19, 161.86, 161.99, 162.59. HRMS (ES); *m/z* calc. for C<sub>30</sub>H<sub>38</sub>N<sub>2</sub>O<sub>4</sub>Br: 569.2009, found: 569.2005 (MH<sup>+</sup>).

*The bis-brominated species N,N'*-bis-(*n*-octyl)-2,6-dibromo-1,4,5,8-naphthalene diimide (2,6-Br-NDI) may be obtained by column chromatography from the fraction immediately before the desired product as a yellow powder, discernible by <sup>1</sup>H NMR spectroscopy by a singlet resonance at 8.99 ppm (CDCl<sub>3</sub>) corresponding to the two equivalent naphthalene protons. It is noted that the four equivalent naphthalene protons in un-substituted *N,N'*-bis-(*n*-octyl)-1,4,5,8-naphthalene diimide give a singlet resonance in <sup>1</sup>H NMR spectra at 8.75 ppm (CDCl<sub>3</sub>).

## TMS-Pt-Cl

Following an adapted literature procedure<sup>5</sup>, *cis*-Pt(PBu<sub>3</sub>)<sub>2</sub>Cl<sub>2</sub> (438 mg, 0.65 mmol) and CuI (11 mg, 0.057 mmol, 8 mol%) were added to deaerated Et<sub>2</sub>NH (30 ml) under an N<sub>2</sub> atmosphere. Trimethylsilylacetylene (83 μl, ρ = 0.7 g/ml, 0.59 mmol) was added and the solution stirred at 45 °C for 8 h. The solvent was removed by rotary evaporation and the crude residue purified *via* column chromatography (SiO<sub>2</sub>, 7:3 hexane / CH<sub>2</sub>Cl<sub>2</sub>), giving the product as a colourless oil. Yield = 312 mg, 72%. <sup>1</sup>H NMR (CDCl<sub>3</sub>, 400 MHz): 0.05 (s, 9H), 0.92 (t, *J* = 7.1 Hz, 18H), 1.37-1.58 (m, 24H), 1.89-2.04 (m, 12H). <sup>31</sup>P NMR (CDCl<sub>3</sub>, 162 MHz): 6.14 (*J*<sub>Pt-P</sub> = 2394 Hz). <sup>13</sup>C NMR (CDCl<sub>3</sub>, 101 MHz): 1.22, 13.93, 21.91 (t, *J* = 17.0 Hz), 24.38 (t, *J* = 6.7 Hz), 26.14, 102.46 (t, *J* = 14.2 Hz), 104.72. MALDI-TOF-MS: 696.4 (M-Cl)<sup>+</sup>.

## Synthesis of NDI-Pt-Cl (1)

TMS-Pt-Cl (229 mg, 0.31 mmol), 2-Br-NDI (178 mg, 0.31 mmol), Pd(PPh<sub>3</sub>)<sub>2</sub>Cl<sub>2</sub> (33 mg, 0.047 mmol, 15mol%) and CuI (14 mg, 0.073 mmol, 24 mol%) were added to a two-neck flask and placed under a N<sub>2</sub> atmosphere. Thoroughly deaerated and dry 20:1 (v/v) THF / Et<sub>3</sub>N (20 ml) was added and the reaction solution stirred under N<sub>2</sub> at r.t for 10 mins. Tetrabutyl ammonium fluoride solution (TBAF, 1M in THF) (0.31 ml, 0.31 mmol) was added dropwise over 2-3 mins and the reaction solution stirred at r.t. for 24 hours, before evaporation of the solvent under reduced pressure. The crude residue was purified by column chromatography (SiO<sub>2</sub> 3:1 CH<sub>2</sub>Cl<sub>2</sub> / hexane), discarding weak pink-, orange- and yellow-coloured bands with collection of the dark-red fraction. Evaporation of the solvent yielded a dark-red residue (209 mg) which was found to contain both 2-NDI-Pt-Cl and 2-NDI-Pt-Br. These complexes could be separated by further column chromatography (SiO<sub>2</sub>, toluene), with the desired chloride-containing complex eluting from the second of two closely spaced red-coloured bands. Yield = 40 mg, 11%. <sup>1</sup>H NMR (CDCl<sub>3</sub>, 400 MHz): 0.84-0.95 (m, 24), 1.22-1.50 (m, 32H), 1.57-1.66 (m, 12H), 1.66-1.76 (m, 4H), 2.03-2.18 (m, 12H), 4.11-4.20 (m, 4H), 8.55 (s, 1H), 8.59 (d, *J* = 7.6 Hz, 1H), 8.70 (d, *J* = 7.6 Hz, 1H). <sup>31</sup>P NMR (CDCl<sub>3</sub>, 162 MHz): 7.37 (*J*<sub>Pt-P</sub> = 2316 Hz). ASAP-TOF MS: 1147.8.

*Whilst the <sup>1</sup>H NMR spectra of 2-NDI-Pt-Cl and 2-NDI-Pt-Br are near identical, the latter may be identified by <sup>31</sup>P NMR (CDCl<sub>3</sub>, 162 MHz): 4.66 (*J*<sub>Pt-P</sub> = 2295 Hz), ASAP-TOF MS: 1191.7.*

## TMS-Pt-Ph

Cl-Pt-Ph (136 mg, 0.18 mmol) and CuI (4 mg, 0.021 mmol, 11mol%) were added to deaerated, dry 2:1 (v/v) <sup>i</sup>Pr<sub>2</sub>NH / THF (20 ml) under an N<sub>2</sub> atmosphere. Trimethylsilylacetylene (0.07 ml, ρ = 0.7 g/ml, 0.49 mmol) was added and the solution stirred for 4 h at r.t. The solvent was removed by rotary evaporation and the crude residue purified by column chromatography (SiO<sub>2</sub>, 2% EtOAc / hexane), giving a very pale-yellow coloured oil. Yield = 121 mg, 82 %. <sup>1</sup>H NMR (CDCl<sub>3</sub>, 400 MHz): 0.07 (s, 9H), 0.92 (t, *J* = 7.3 Hz, 18H), 1.37-1.49 (m, 12H), 1.51-1.63 (m, 12H), 2.00-2.17 (m, 12H), 7.08 (t, *J* = 7.2 Hz, 1H), 7.17 (t, *J* = 7.5 Hz, 2H), 7.24 (d, *J* = 7.5 Hz, 2H). <sup>13</sup>C NMR (CDCl<sub>3</sub>, 101 MHz): 1.34, 13.97, 23.86 (t, *J* = 17.0 Hz), 24.50 (t, *J* = 6.7 Hz), 26.43, 108.68 (t, *J* = 14.8 Hz), 109.13, 112.55, 124.85, 127.92, 129.19, 130.92. <sup>31</sup>P NMR (CDCl<sub>3</sub>, 162 MHz): 2.24 (*J*<sub>Pt-P</sub> = 2373 Hz). MALDI-TOF-MS: 797.4 (M<sup>+</sup>).

## Synthesis of NDI-Pt-Ph (2)

TMS-Pt-Ph (120 mg, 0.15 mmol), 2-Br-NDI (85 mg, 0.15 mmol), Pd(PPh<sub>3</sub>)<sub>2</sub>Cl<sub>2</sub> (15 mg, 0.021 mmol, 14 mol%) and CuI (7 mg, 0.036 mmol, 25 mol%) were added to a two-neck flask and placed under a N<sub>2</sub> atmosphere. Thoroughly deaerated and dry 10:1 (v/v) THF / Et<sub>3</sub>N (20 ml) was added and the mixture stirred under N<sub>2</sub> at r.t. for 30 mins. TBAF (1M in THF) (0.165 ml, 0.165 mmol) was added dropwise over 2-3 mins and the resultant dark red-brown coloured solution stirred at r.t. for 20 hours. The solution was passed through a short (1 cm) SiO<sub>2</sub> pad and the filtrate evaporated to dryness. The crude residue was purified *via* column chromatography (SiO<sub>2</sub>, 1:1 CH<sub>2</sub>Cl<sub>2</sub> / hexane), with the product eluting from

the deep-red coloured band. Yield = 96 mg, 53 %. <sup>1</sup>H NMR (d<sub>6</sub>-acetone, 400 MHz): 0.84-0.90 (m, 6H), 0.94 (t, *J* = 7.3 Hz, 18H), 1.25-1.57 (m, 32H), 1.67-1.80 (m, 16H), 2.25-2.40 (m, 12H), 4.08-4.18 (m, 4H), 7.12 (tt, *J* = 1.4, 7.2 Hz, 1H), 7.20-7.31 (m, 4H), 8.49 (s, 1H), 8.51 (d, *J* = 7.6 Hz, 1H), 8.62 (d, *J* = 7.6 Hz, 1H). <sup>31</sup>P NMR (d<sub>6</sub>-Acetone, 162 MHz): 4.17 (*J*<sub>Pt-P</sub> = 2329 Hz). <sup>13</sup>C NMR (d<sub>6</sub>-acetone, 151 MHz): 14.19, 14.33, 14.36, 23.29, 23.31, 24.73 (t, *J* = 17.7 Hz), 25.04 (t, *J* = 6.8 Hz), 27.28, 27.74, 27.97, 28.64, 28.81, 29.92, 30.02, 30.18, 32.54, 32.60, 41.10, 107.99 (t, *J* = 15.1 Hz), 110.95, 114.46, 123.78, 125.03, 125.67, 125.83, 126.55, 127.45, 128.80, 128.83, 129.33, 130.06, 131.16, 131.45, 133.74, 138.54, 139.22, 139.32, 139.41, 162.49, 163.31, 163.57, 163.78. MALDI-TOF-MS: 1214.6 (M+H)<sup>+</sup>.

### Synthesis of TMS-Pt-PTZ

Cl-Pt-PTZ (375 mg, 0.39 mmol) and CuI (6 mg, 0.03 mmol) were combined in deaerated, dry 3:1 (v/v) <sup>1</sup>Pr<sub>2</sub>NH / THF (20 ml) under an N<sub>2</sub> atmosphere. Trimethylsilylacetylene (0.09 ml, ρ = 0.7 g/ml, 0.64 mmol) was added and the mixture stirred at r.t. for a further 5 h. Removal of the solvent by rotary evaporation afforded a pale-yellow coloured residue which was purified by column chromatography (SiO<sub>2</sub>, 3% EtOAc / hexane), giving the pure product as a very pale yellow solid. Yield = 346 mg, 87 %. <sup>1</sup>H NMR (CDCl<sub>3</sub>, 400 MHz): 0.07 (s, 9H), 0.91 (t, *J* = 7.0 Hz, 18H), 1.37-1.48 (m, 12H), 1.50-1.62 (m, 12H), 2.00-2.17 (m, 12H), 5.01 (s, 2H), 6.63 (d, *J* = 7.8 Hz, 2H), 6.84 (t, *J* = 7.5 Hz, 2H), 6.95 (t, *J* = 7.5 Hz, 2H), 7.06 (d, *J* = 7.5 Hz, 2H), 7.10 (d, *J* = 7.8 Hz, 2H), 7.20 (d, *J* = 7.8 Hz, 2H). <sup>13</sup>C NMR (CDCl<sub>3</sub>, 151 MHz): 1.33, 13.97, 23.83 (t, *J* = 17.0 Hz), 24.49 (t, *J* = 6.9 Hz), 26.41, 52.87, 108.71, 109.07 (t, *J* = 14.5 Hz), 112.54, 115.66, 122.52, 123.09, 126.28, 126.84, 127.32, 131.23, 132.99, 144.63. <sup>31</sup>P NMR (CDCl<sub>3</sub>, 162 MHz): 2.21 (*J*<sub>Pt-P</sub> = 2371 Hz). HRMS (ES); *m/z* calc. for C<sub>50</sub>H<sub>77</sub>NP<sub>2</sub>SSiPt: 1008.4669, found: 1008.4709 (M<sup>+</sup>).

### Synthesis of NDI-Pt-PTZ (3)

TMS-Pt-PTZ (202 mg, 0.20 mmol), 2-Br-NDI (119 mg, 0.21 mmol), Pd(PPh<sub>3</sub>)<sub>2</sub>Cl<sub>2</sub> (20 mg, 0.028 mmol, 14 mol%) and CuI (12 mg, 0.063 mmol, 31 mol%) were added to a 2-neck flask and placed under an N<sub>2</sub> atmosphere. Thoroughly deaerated and dry 10:1 (v/v) THF / Et<sub>3</sub>N (20 ml) was added and the resultant mixture stirred for 35 mins at r.t. TBAF (1M in THF) (0.22 ml, 0.22 mmol) was added dropwise over a period of 5 mins and the red-brown coloured solution stirred for a further 22 h at r.t. The reaction solution was passed through a short (1cm) SiO<sub>2</sub> pad and the filtrate evaporated to leave a dark-red coloured residue which was purified *via* column chromatography (SiO<sub>2</sub>, 1:1 CH<sub>2</sub>Cl<sub>2</sub> / hexane). After removal of pale yellow, orange and pink coloured bands, the product was obtained from the deep-red coloured fraction. Yield = 172 mg, 60 %. <sup>1</sup>H NMR (CDCl<sub>3</sub>, 400 MHz): 0.84-0.93 (m, 24H), 1.21-1.50 (m, 32H), 1.58-1.77 (m, 16H), 2.13-2.29 (m, 12H), 4.11-4.20 (m, 4H), 5.03 (s, 2H), 6.64 (dd, *J* = 0.8, 8.0 Hz, 2H), 6.85 (td, *J* = 1.0, 7.5 Hz, 2H), 6.96 (td, *J* = 1.6, 7.6 Hz, 2H), 7.07 (dd, *J* = 1.5 Hz, 2H), 7.15 (d, *J* = 8.2 Hz, 2H), 7.24 (d, *J* = 8.2 Hz, 2H), 8.57 (d, *J* = 7.7 Hz, 1H), 8.58 (s, 1H), 8.69 (d, *J* = 7.7 Hz, 1H). <sup>1</sup>H NMR (d<sub>6</sub>-Acetone, 400 MHz): 0.83-0.96 (m, 24H), 1.24-1.56 (m, 32H), 1.66-1.79 (m, 16H), 2.23-2.38 (m, 12H), 4.08-4.19 (m, 4H), 5.13 (s, 2H), 6.79 (dd, *J* = 0.9, 8.2 Hz, 2H), 6.89 (td, *J* = 1.0, 7.5 Hz, 2H), 7.05 (td, *J* = 1.5, 7.7 Hz, 2H), 7.10 (dd, *J* = 1.5, 7.5 Hz, 2H), 7.23 (d, *J* = 9.5 Hz, 2H), 7.26 (d, *J* = 9.0 Hz, 2H), 8.50 (s, 1H), 8.53 (d, *J* = 7.7 Hz, 1H), 8.64 (d, *J* = 7.7 Hz, 1H). <sup>13</sup>C NMR (d<sub>6</sub>-Acetone, 101 MHz): 14.25, 14.36, 14.39, 23.31, 23.33, 24.71 (t, *J* = 17.5 Hz), 25.06 (t, *J* = 6.7 Hz), 27.29, 27.79, 28.01, 28.66, 28.81, 32.56, 32.63, 41.12, 52.58, 108.11, 108.23, 110.75, 114.49, 116.69, 123.40, 123.70, 124.10, 124.84, 125.44, 126.39, 127.22, 127.42, 127.53, 128.17, 128.68, 128.76, 129.16, 131.03, 131.69, 133.75, 134.60, 138.57, 145.56, 162.37, 163.16, 163.41, 163.58. <sup>31</sup>P NMR (CDCl<sub>3</sub>, 162 MHz): 3.39 (*J*<sub>Pt-P</sub> = 2317 Hz). <sup>31</sup>P NMR (d<sub>6</sub>-Acetone, 162 MHz): 4.10 (*J*<sub>Pt-P</sub> = 2333 Hz). MALDI-TOF-MS: 1424.7 (M<sup>+</sup>), 1225.7 (M-PBu<sub>3</sub>)<sup>+</sup>.

## Synthetic scheme

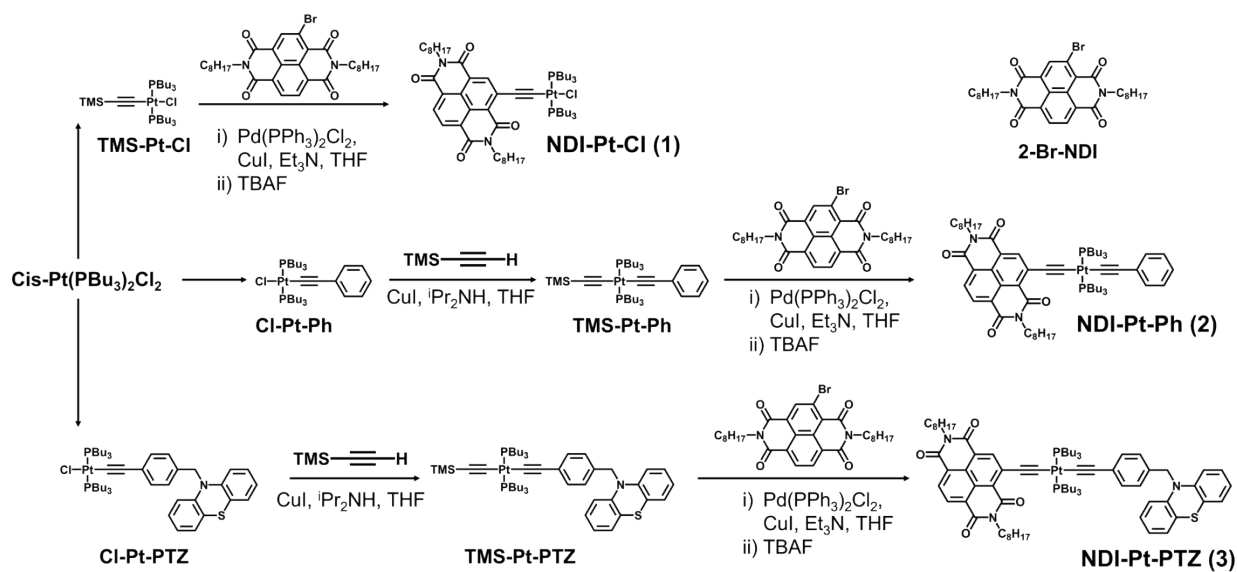

## 2 Experimental results

### 2.1 Emission spectroscopy

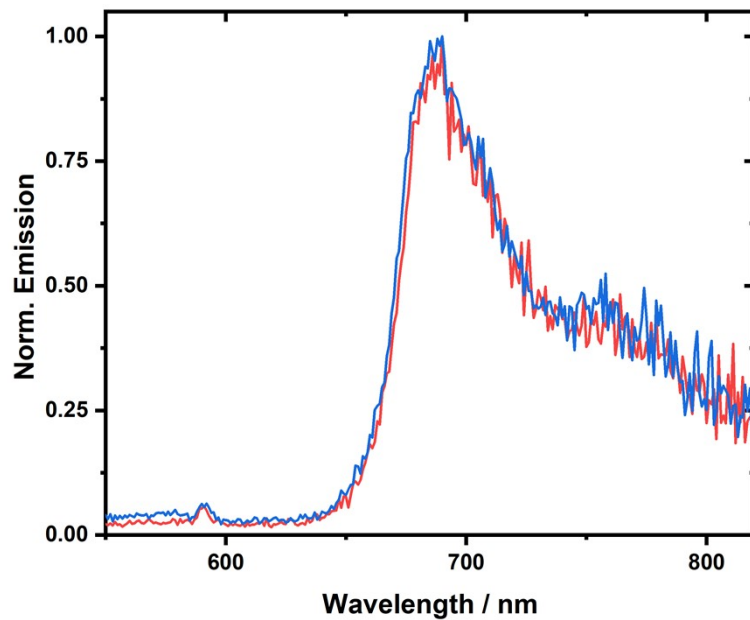

Fig.S1. Room temperature emission spectra of **2** and **3**, in aerated hexane, following excitation at 504 nm.

## 2.2 Time-Resolved Broadband Fluorescence Upconversion (FLUP) of 1 and 2.

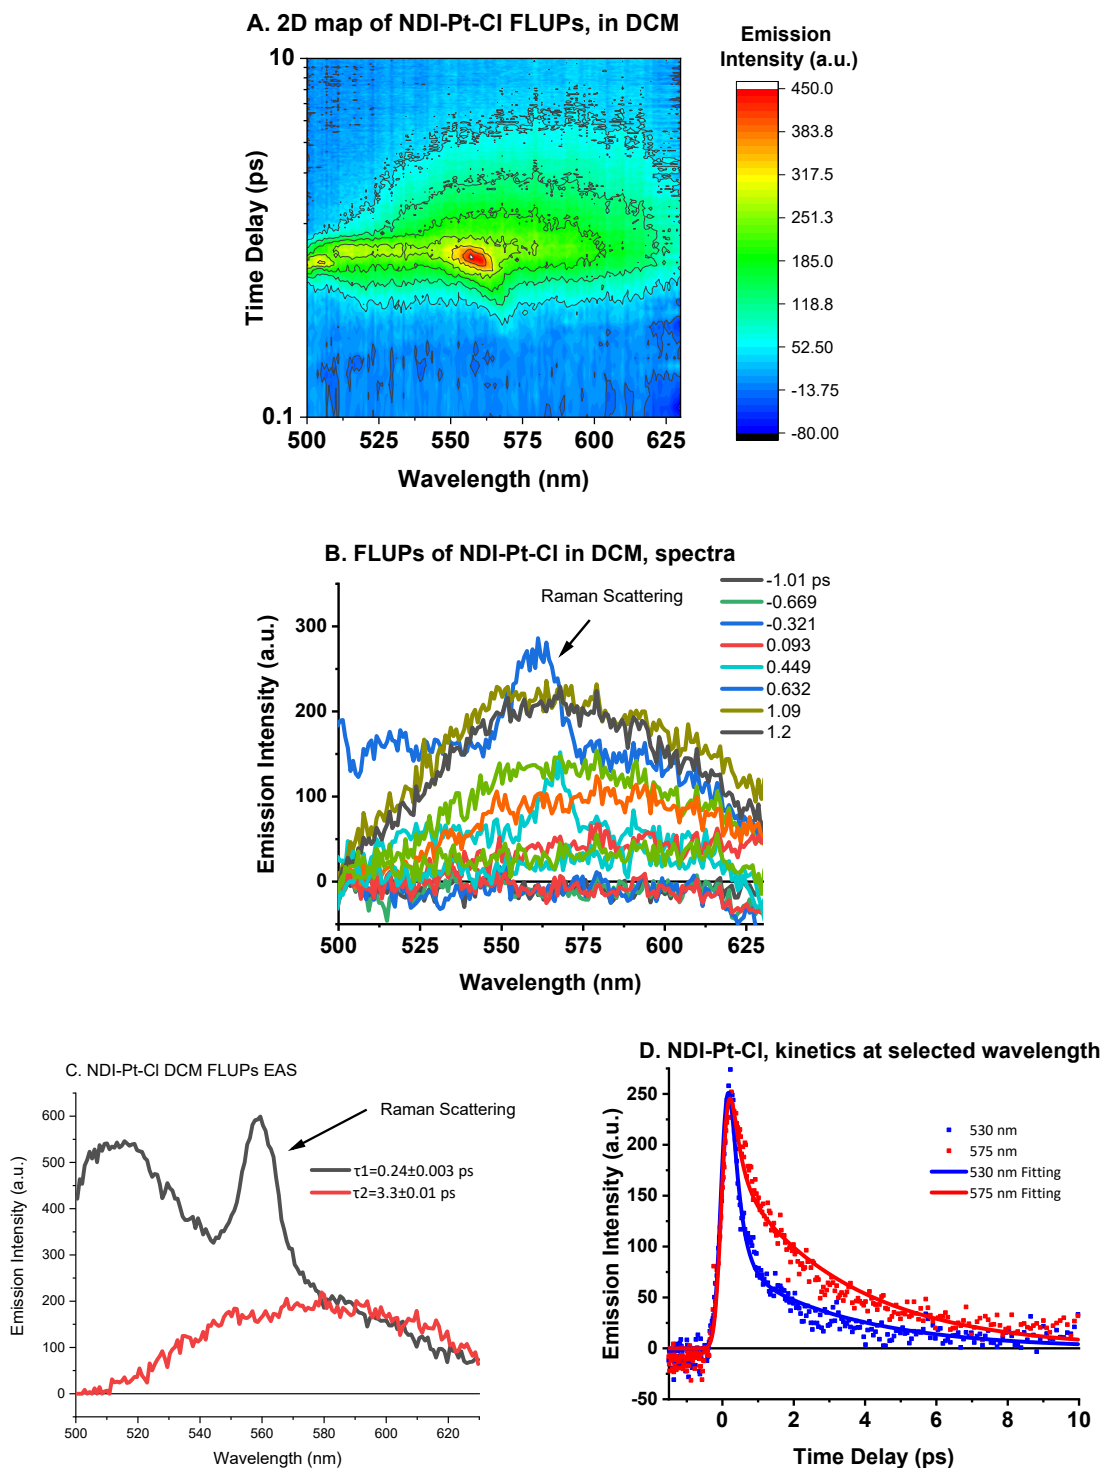

Fig.S2: Fluorescence Upconversion Spectroscopy (FLUPs) of **1** (NDI-Pt-Cl) in DCM, excitation 485 nm. A). 2D map. B). Spectra at stated time delays. C). Global analysis results: EAS spectra, and corresponding lifetimes. D). Kinetic traces at selected wavelength (dots) and fitted function (solid line) by Glotaran, where the Gaussian function for the IRF is used along with the two lifetimes given (0.2 and 3.3 ps). [Journal of Statistical Software, June 2012, Volume 49, Issue 3; [10.18637/jss.v049.i03](https://doi.org/10.18637/jss.v049.i03); I. H. M. van Stokkum, D. S. Larsen and R. van Grondelle, Biochim Biophys Acta Bioenerg, 2004, 1657, 82–104; [http://www.nat.vu.nl/~jsnel/pub/2011/20110223-MScThesis\\_SnellenburgJ.pdf](http://www.nat.vu.nl/~jsnel/pub/2011/20110223-MScThesis_SnellenburgJ.pdf)]

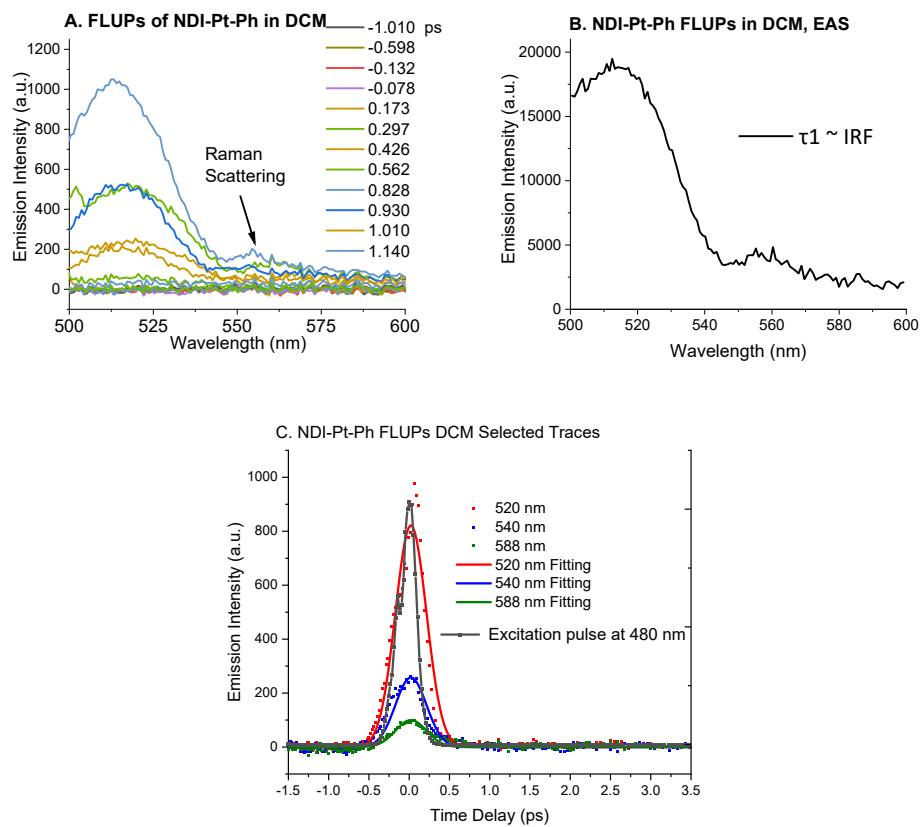

Fig.S3: A). FLUPs spectra of NDI-Pt-Ph, **2** in DCM, excitation 480 nm; B). EAS extracted by GLA gives a kinetic trace with lifetime shorter than FLUPs setup IRF (200 fs FWHM) and C). Kinetic traces (dots) and fitting trace (solid line) of FLUPs of **2** which shows a Gaussian distribution similar to the excitation pulse signal at 480 nm (dots with solid line).



## 2.3 Cyclic Voltammetry

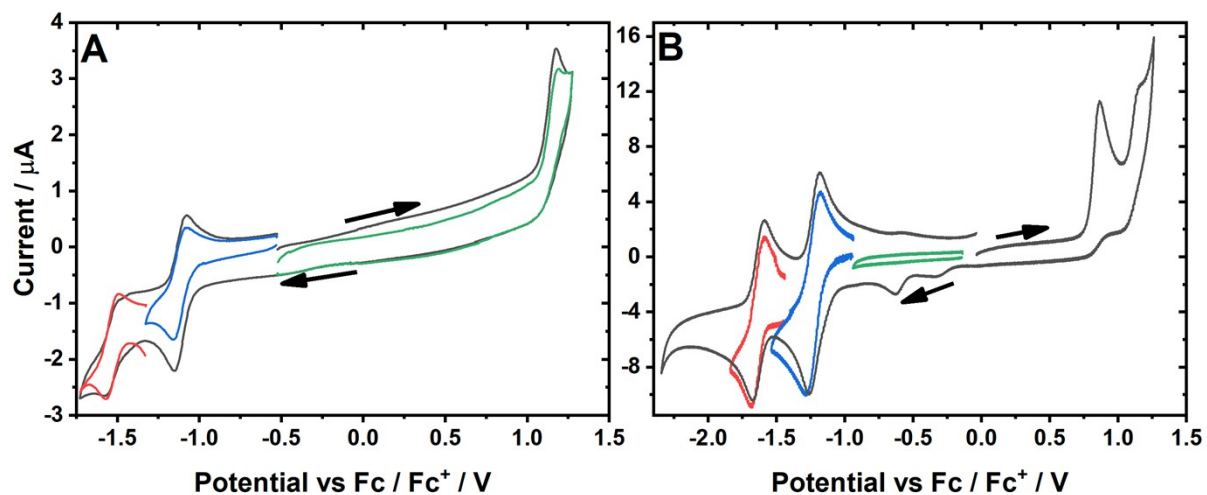

Fig. S4. Cyclic voltammograms of complex 1 (panel A) and 2 (panel B), in a dry DCM solution containing  $0.2 \text{ mol dm}^{-3} [\text{NH}_4][\text{PF}_6]$ , recorded at room temperature at a scan rate of  $100 \text{ mV s}^{-1}$ . The blue and red traces are isolated scans of the first and second reduction processes, respectively.

## 2.4 UV-vis spectroelectrochemistry and comparison with late-time TA of 3

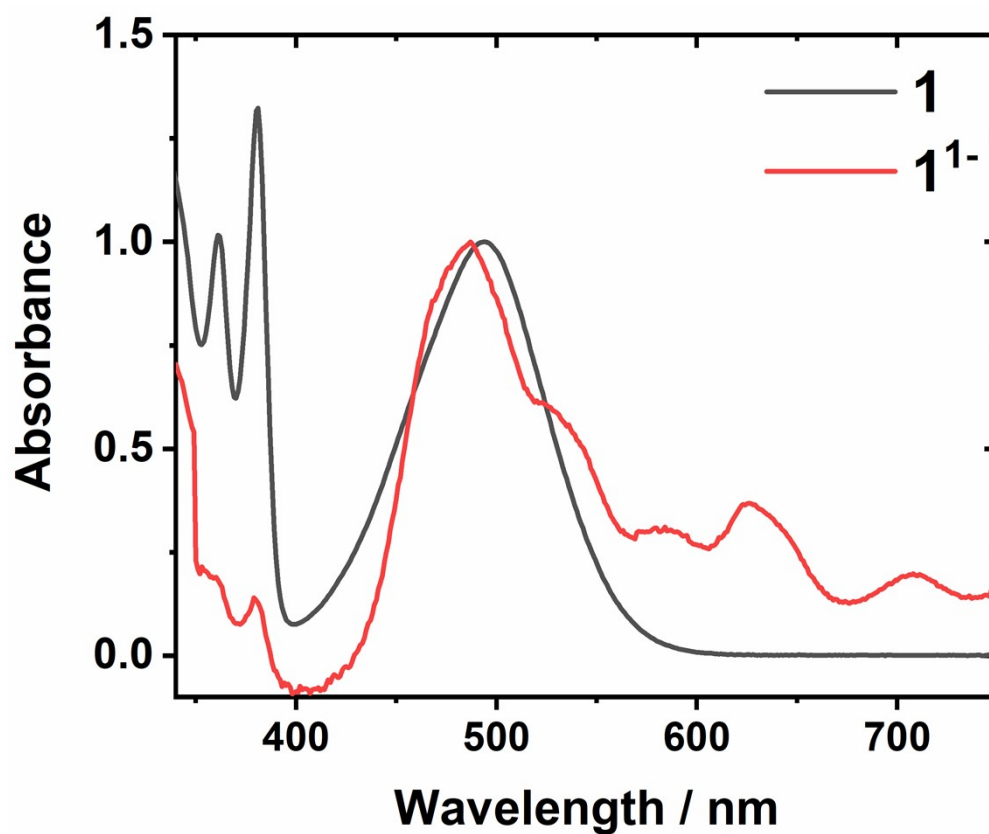

Fig.S5a. UV-vis absorption spectra of 1 and the 1e<sup>-</sup> reduced species of 1, in DCM, in the region 340 – 750 nm.

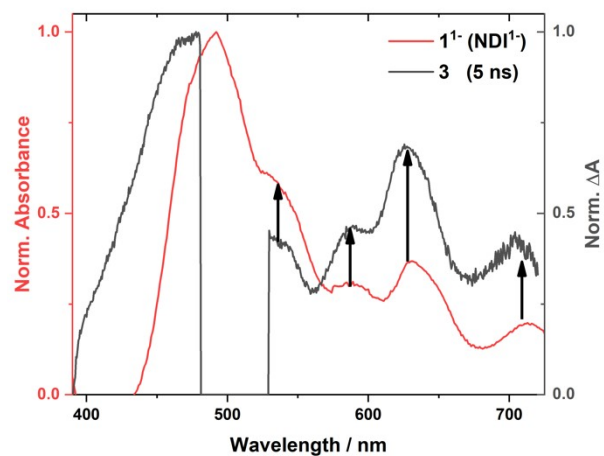

Fig. S5b. A plot of the late time (5 ns) TA spectrum of **3**, following excitation at 500 nm in DCM, along with the UV-Vis absorption spectrum of **1**<sup>1-</sup>.

## 2.5 Time-resolved Infrared Spectroscopy

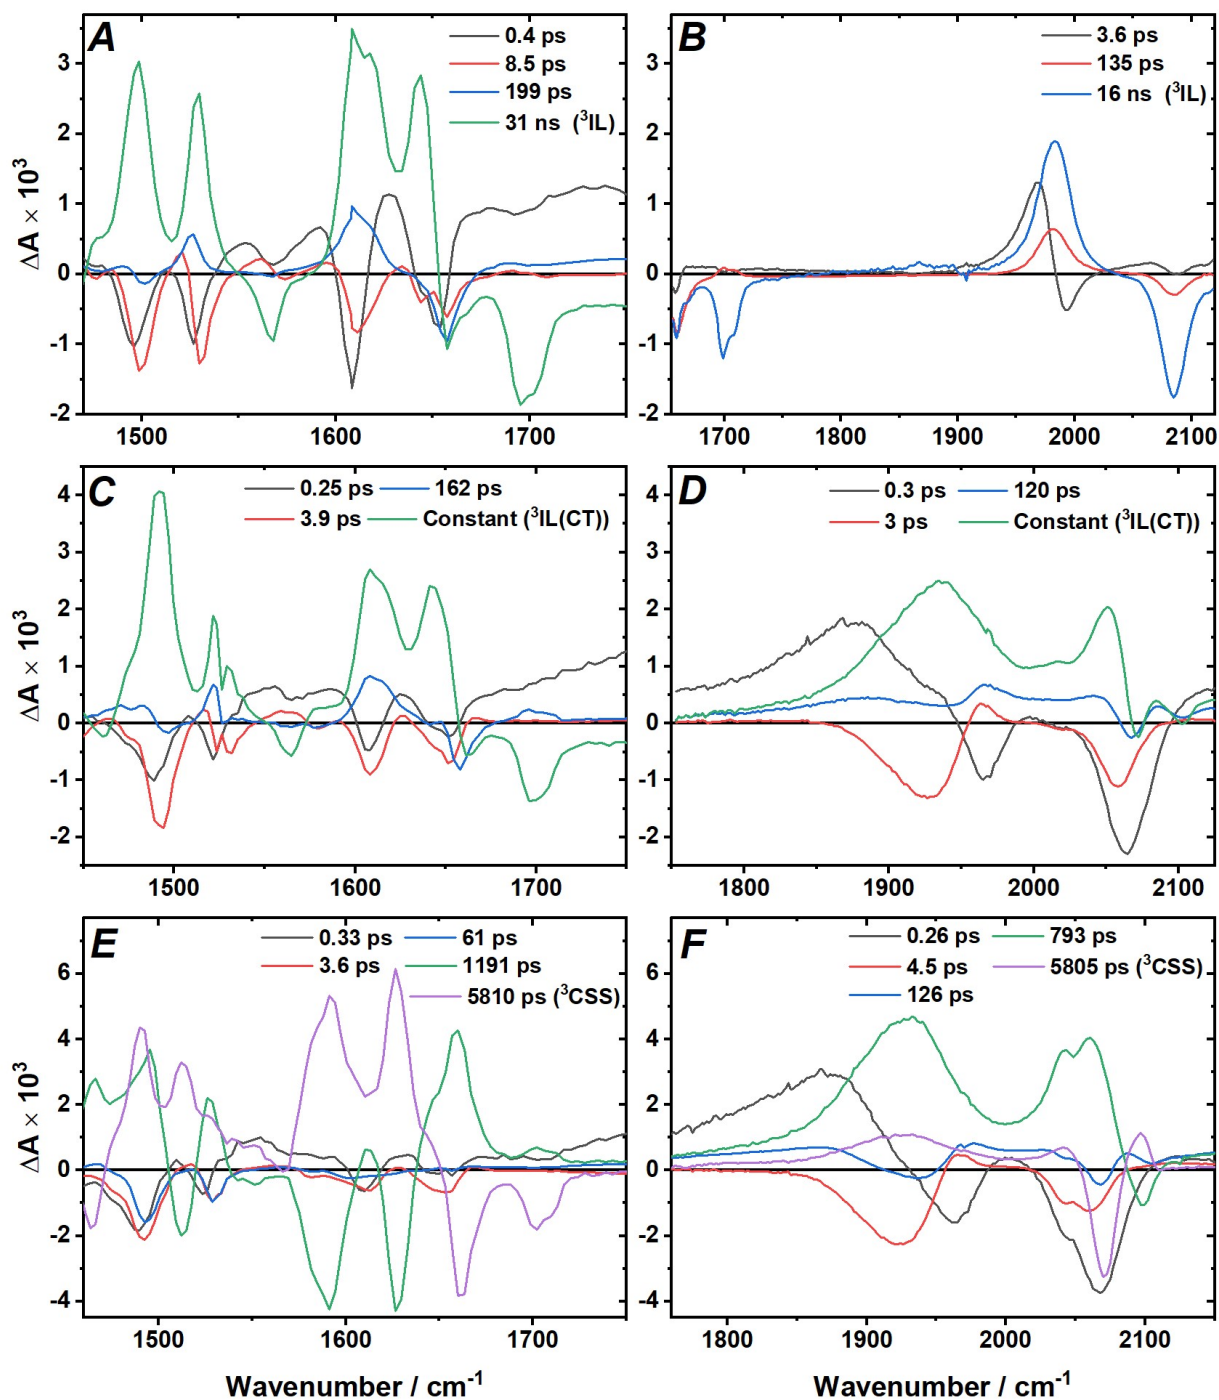

Fig.S6. DAS of the carbonyl and acetylide region TRIR spectra (in DCM) of complex 1, 2 and 3. The associated decay lifetimes are given as insets.

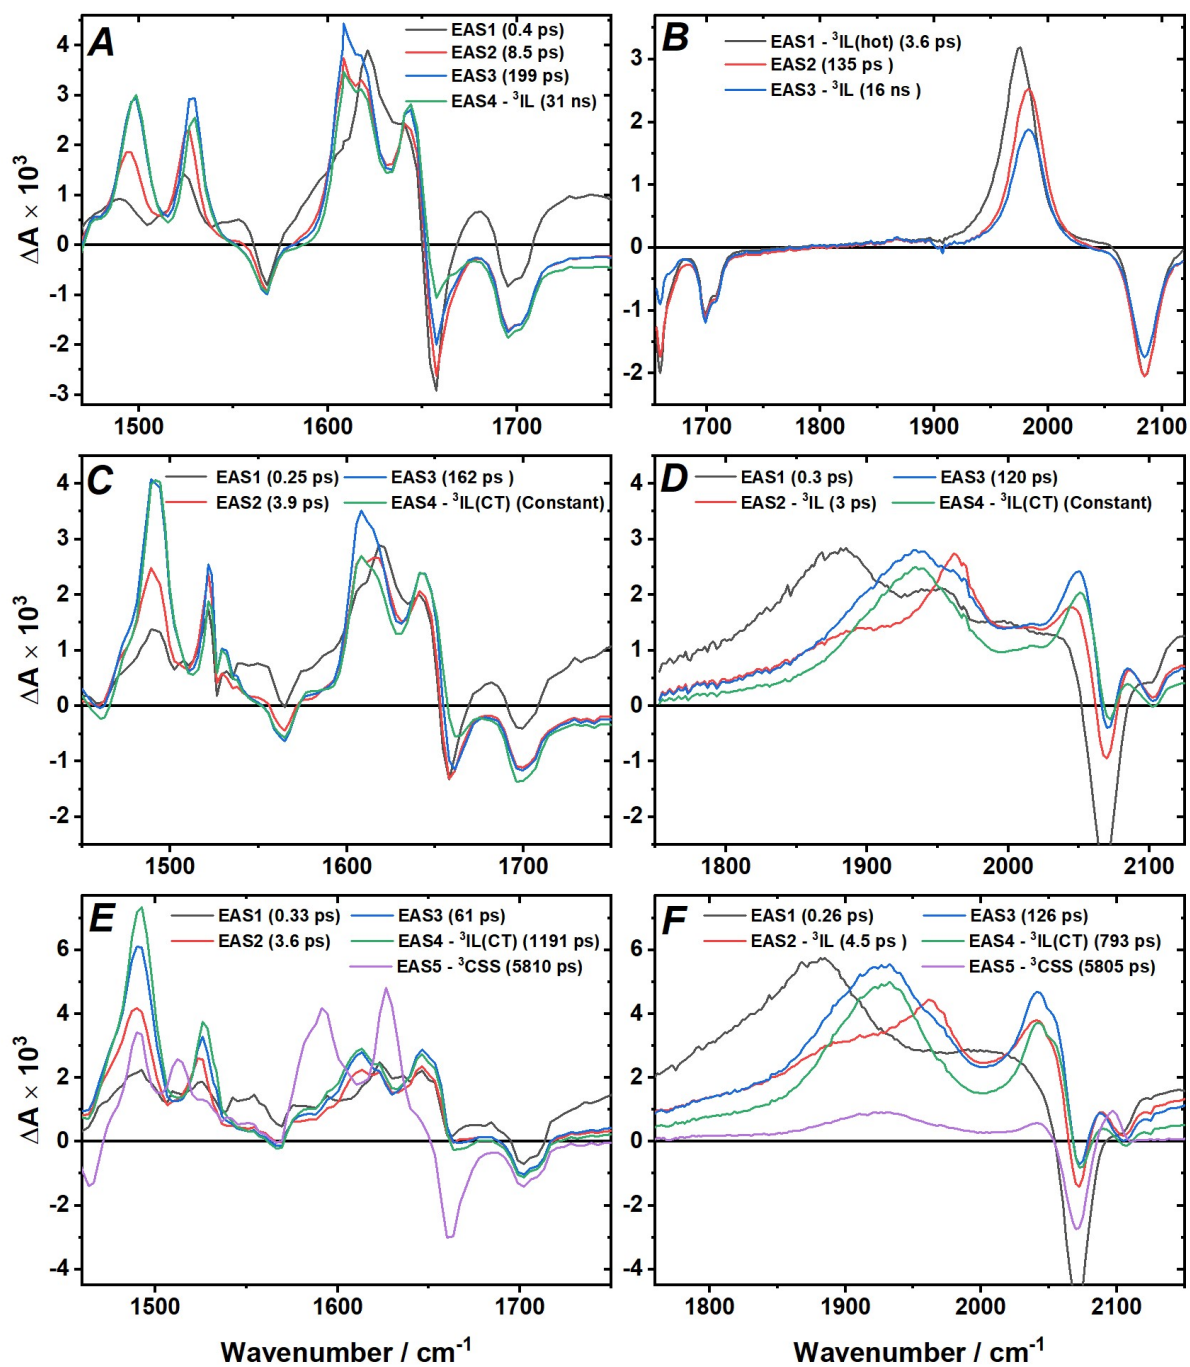

Fig.S7. EAS of the carbonyl and acetylide region TRIR spectra (in DCM) of complex 1, 2 and 3. The associated decay lifetimes are given as insets.

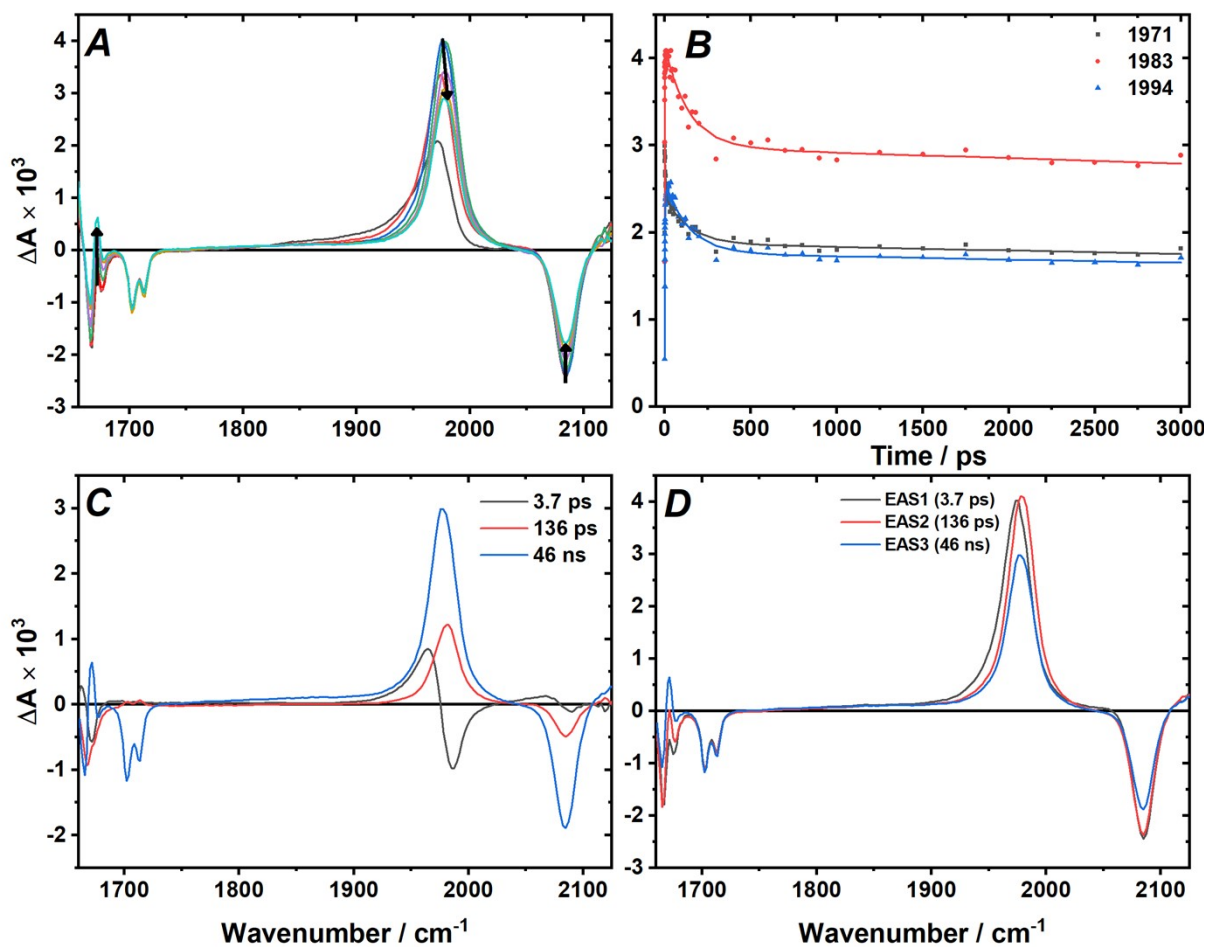

Fig.S8. Panel A: TRIR spectra of complex 1 in the acetylide region, following excitation at 520 nm in hexane. The time delays shown are: 0.4, 0.6, 2, 12, 100, 600 and 3000 ps. Panel B: Single point kinetics traces for select wavelengths for complex 1. The wavelengths are given as insets. The overlaid solid traces are the global fittings obtained from an analysis of the TRIR dataset. Panel C: DAS of the TRIR dataset of complex 1 (in hexane). The associated lifetimes are given as insets. Panel D: EAS of the TRIR dataset of complex 1 (in hexane).

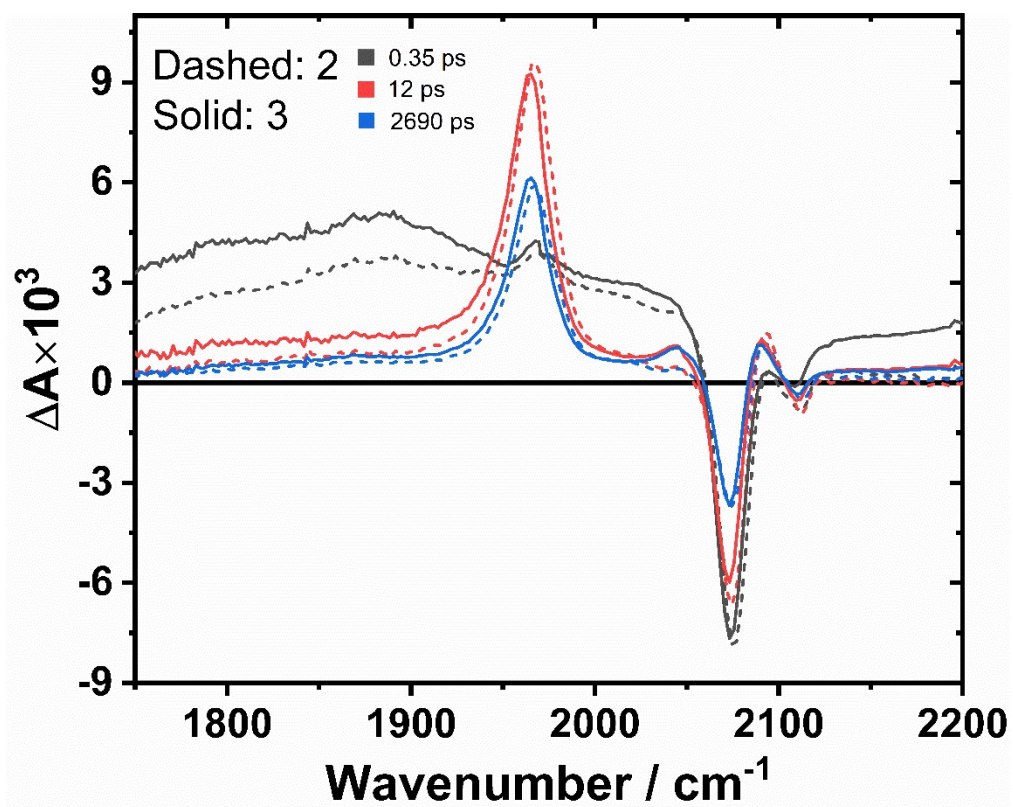

Fig.S9. The TRIR spectra of 2 and 3, in hexane, at pump-probe delays of 0.35, 12 and 2690 ps.

### Lifetime density analysis of TRIR data for 3

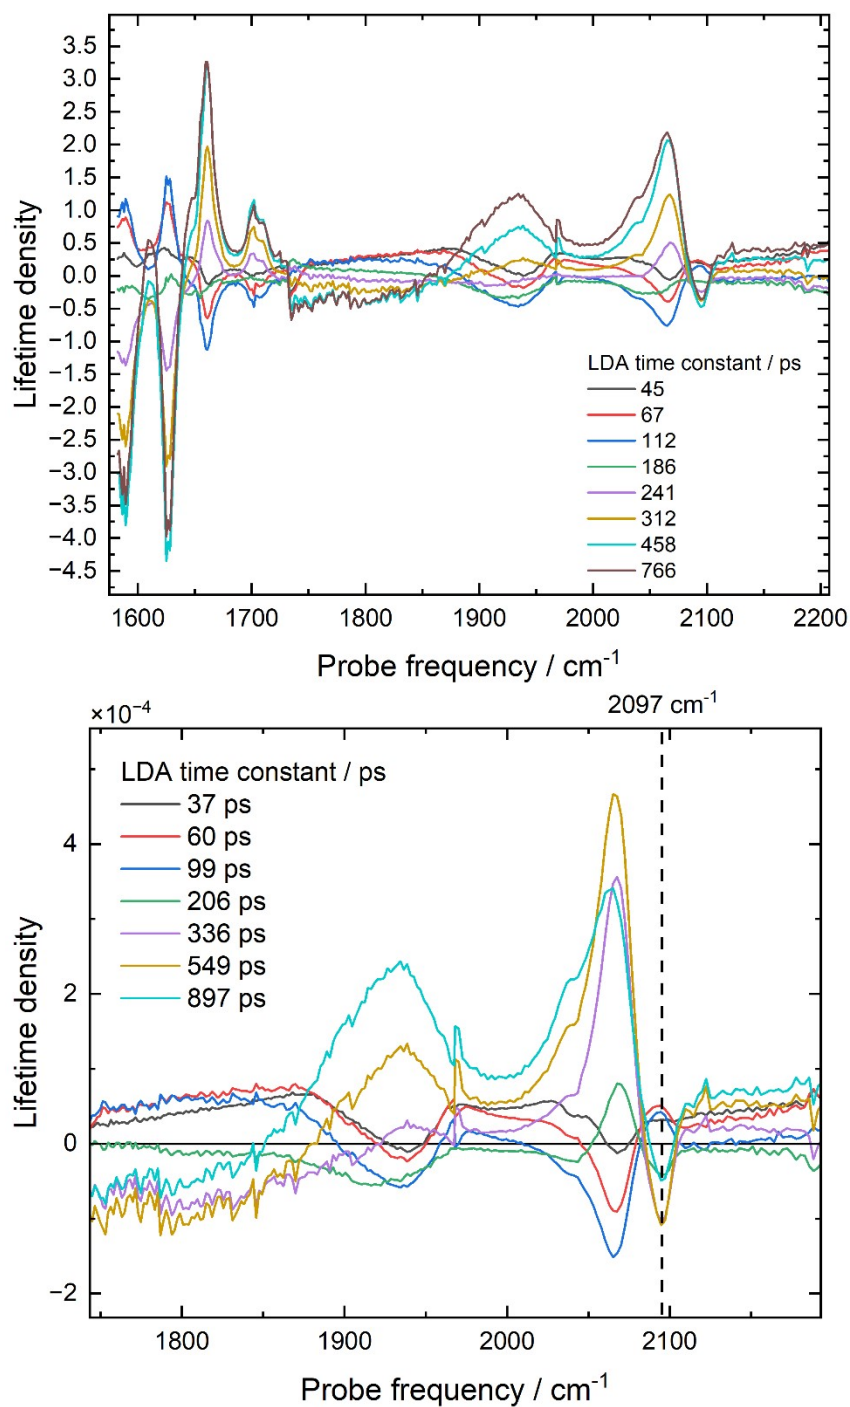

**Fig. S10a. Lifetime density analysis of the TRIR data for 3. Selected traces for the full frequency region (top), and expanded high-frequency ( $\nu(\text{CC})$ ) region, bottom.**

The procedure is described in: Slavov, C.; Hartmann, H.; Wachtveitl, J. Implementation and Evaluation of Data Analysis Strategies for Time-Resolved Optical Spectroscopy. *Anal. Chem.* 2015, 87 (4), 2328–2336. <https://doi.org/10.1021/ac504348h>.



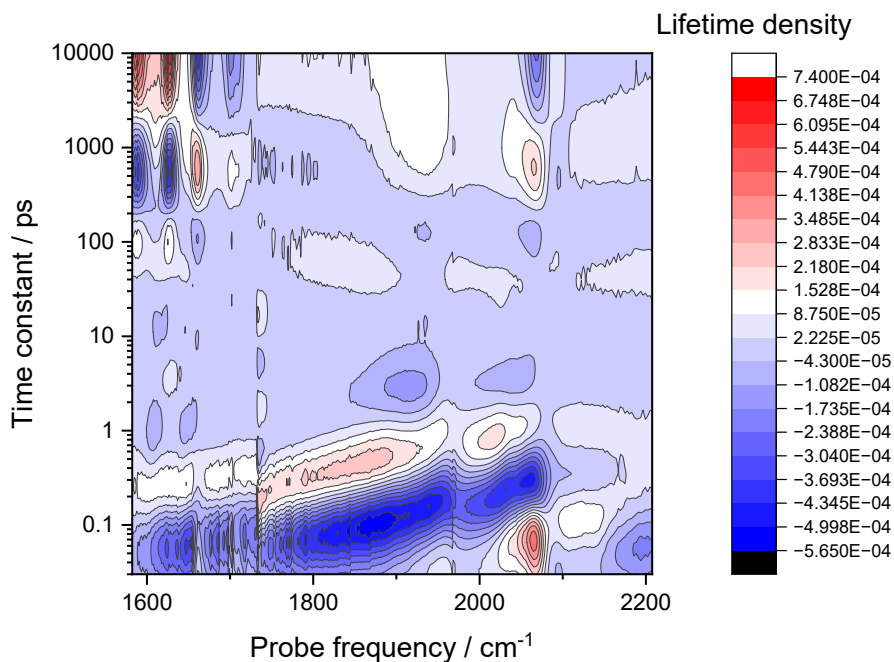

**Fig. S10b. Lifetime density analysis of the TRIR data for 3.** 2D map of the density of the lifetimes in the full spectral range, 1580 – 2200  $\text{cm}^{-1}$ , and full scale of the time constants, up to 10 ns. (note, time scale is shown in log scale). Middle: 2D map of the density of the lifetimes (probability of a specific time constant to occur at a specific wavenumber) for the lower-frequency region 1580 – 1700  $\text{cm}^{-1}$ , and up to 250 ps.

Slavov, C.; Hartmann, H.; Wachtveitl, J. Implementation and Evaluation of Data Analysis Strategies for Time-Resolved Optical Spectroscopy. *Anal. Chem.* 2015, 87 (4), 2328–2336. <https://doi.org/10.1021/ac504348h>.

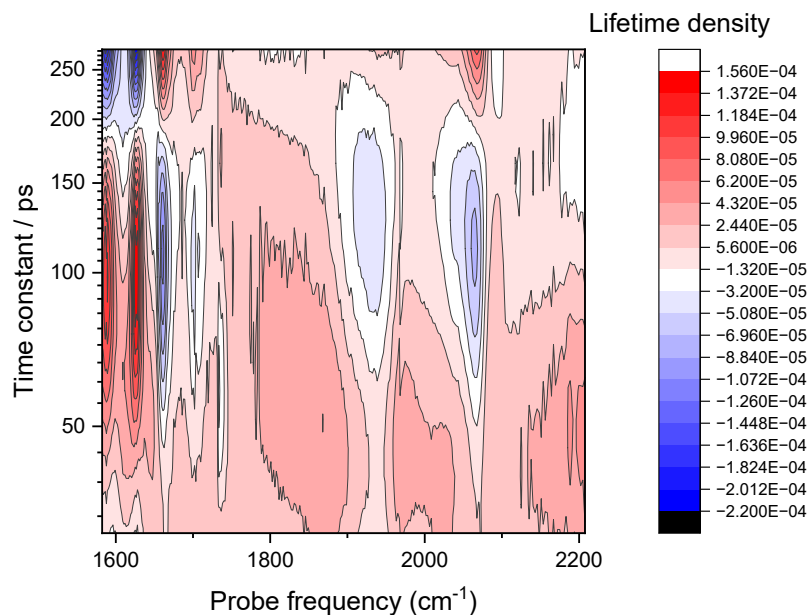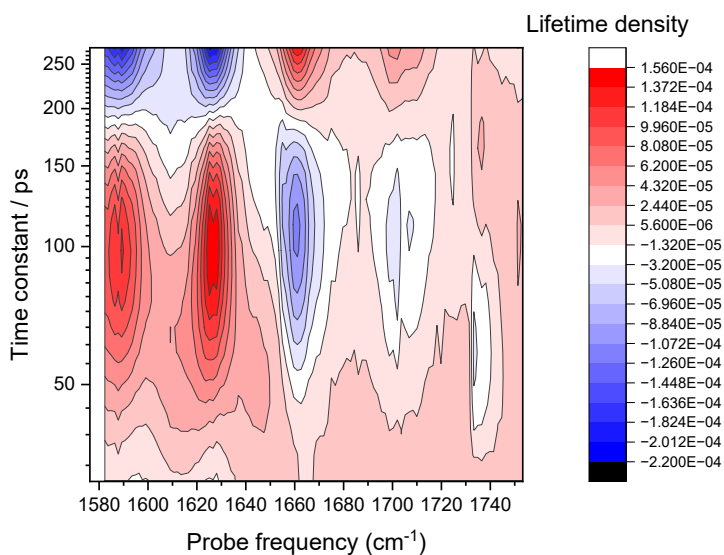

**Fig. S10c. Lifetime density analysis of the TRIR data for 3.** 2D map of the density of the lifetimes in the range 0 – 250 ps (probability of a specific time constant to occur at a specific wavenumber).

Bottom: expanded the lower-frequency region 1580 – 1700 cm<sup>-1</sup>, and up to 250 ps.

Top: full spectra range, including low- and high frequency regions, 1580 – 2200 cm<sup>-1</sup>.

Slavov, C.; Hartmann, H.; Wachtveitl, J. Implementation and Evaluation of Data Analysis Strategies for Time-Resolved Optical Spectroscopy. *Anal. Chem.* 2015, 87 (4), 2328–2336. <https://doi.org/10.1021/ac504348h>.

## 2.6 Transient absorption

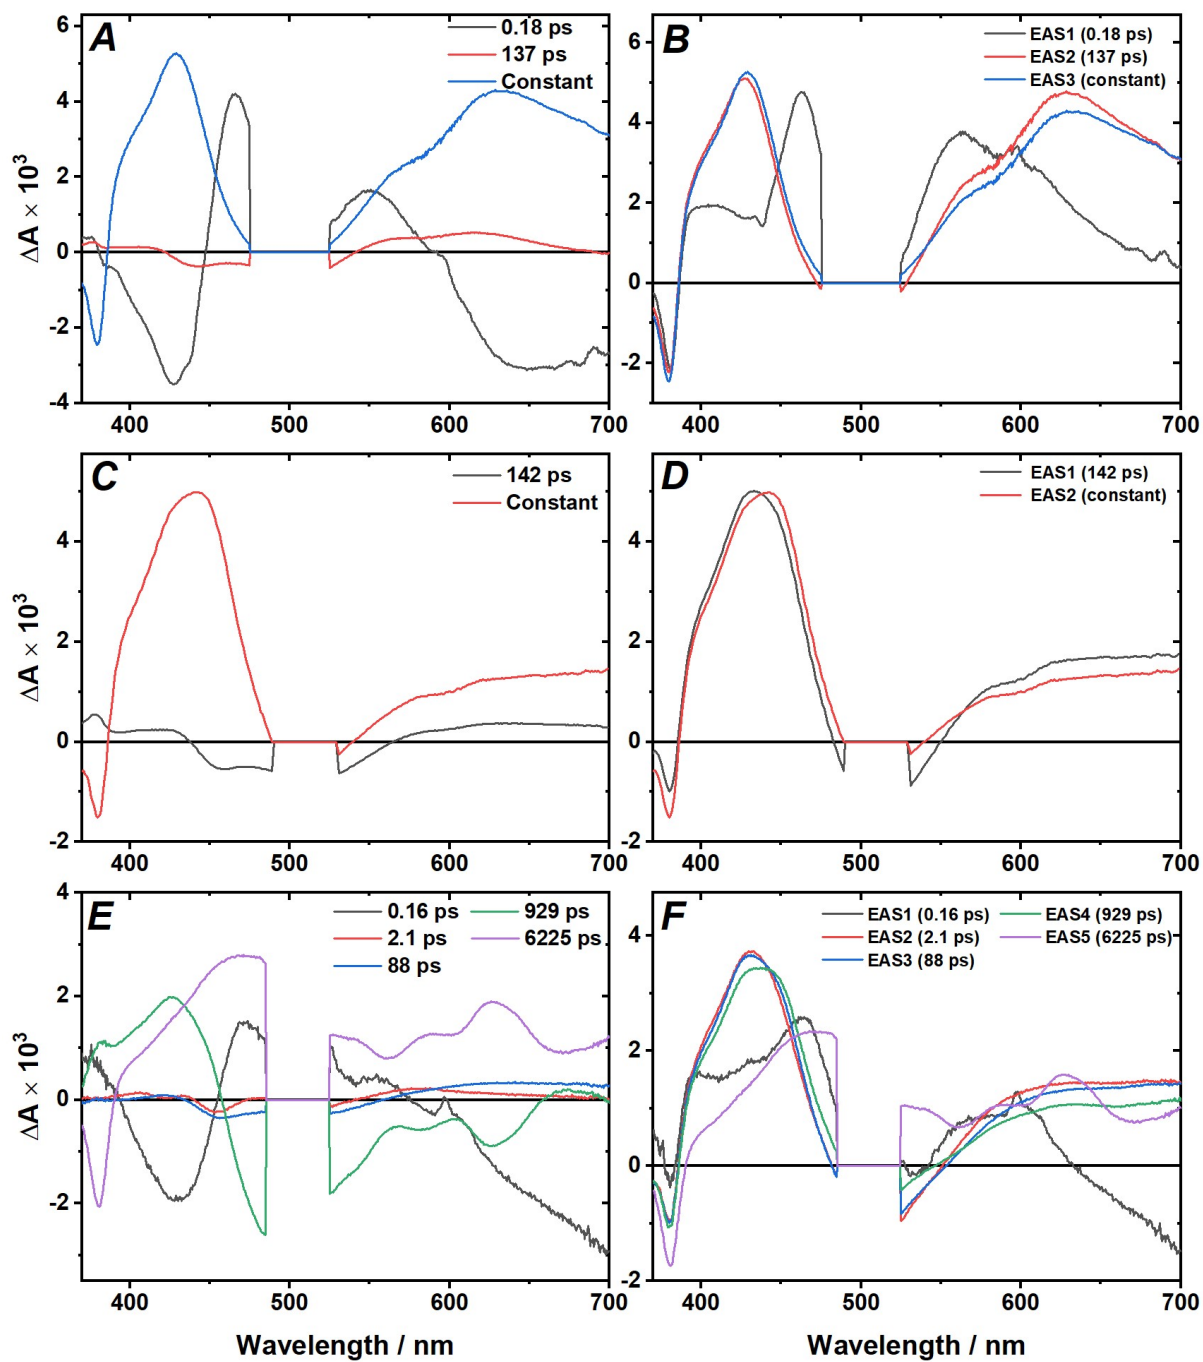

Fig.S11. DAS of the TA spectra (in DCM) of complex 1, 2 and 3 (panel A, C and E, respectively). The associated lifetimes are given as insets. The EAS are also shown for complex 1, 2 and 3 (panel B, D and F, respectively).

## 2.7 Nanosecond Flash Photolysis

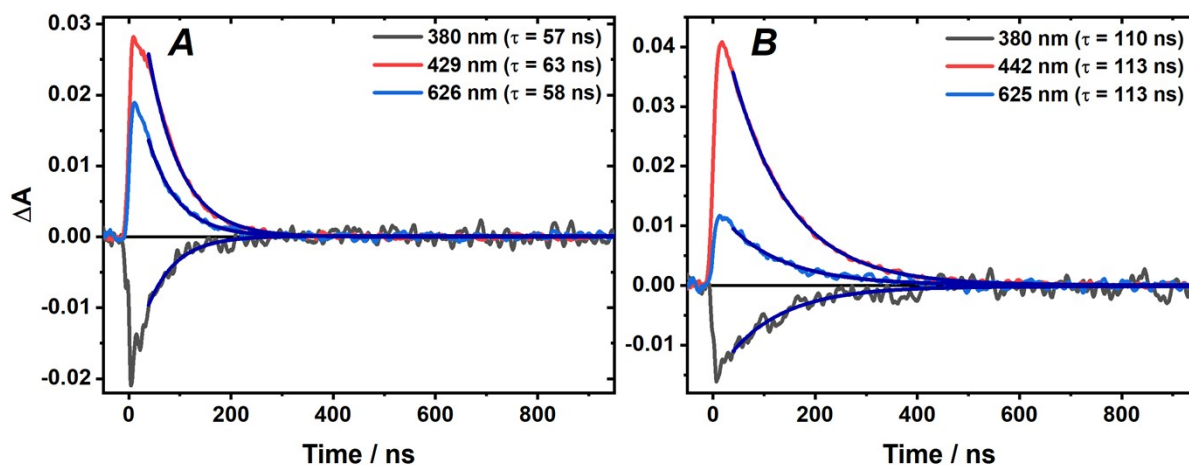

Fig.S12a. Single point kinetic traces at various wavelengths, for complex 1 and 2 (panel A and B, respectively), following excitation at 500 nm in DCM. The solid blue traces overlaid are monoexponential tail fits. The wavelengths and corresponding lifetimes are given in the inset. (the lifetime is estimated as  $112 \text{ ns} \pm 5 \text{ ns}$  from these data).

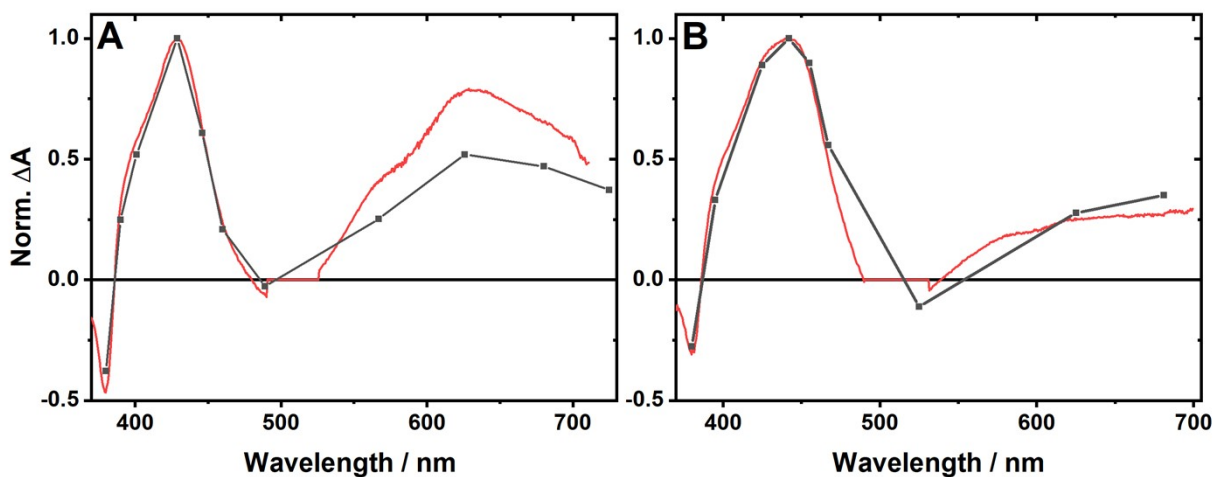

Fig.S12b. Late- and early-time transient UV-vis spectra of complex 1 and 2 (panel A and B, respectively), following excitation at 500 nm in DCM. The red traces are the spectra at 3 ns (TA) and the black traces are the spectra at 50 ns (Flash Photolysis).

## 2.8 Summary of time constants

| <i>Complex</i>         | $\tau/ps$ (TA)      | $\tau/ps$ (LF-TRIR) | $\tau/ps$ (HF-TRIR) | $\tau/ps$ (FLUPS) |
|------------------------|---------------------|---------------------|---------------------|-------------------|
| <i>1</i><br>NDI-Pt-Cl  | 0.18                | 0.4                 | -                   | 0.24              |
|                        | -                   | 8.5                 | 3.6                 | 3.3               |
|                        | 137                 | 199                 | 135                 |                   |
|                        | 60 ns <sup>a</sup>  | 31 ns               | 16 ns               |                   |
| <i>2</i><br>NDI-Pt-Ph  | -                   | 0.25                | 0.3                 | <IRF <sup>c</sup> |
|                        | -                   | 3.9                 | 3                   |                   |
|                        | 142                 | 162                 | 120                 |                   |
|                        | 114 ns <sup>a</sup> | fixed <sup>b</sup>  | fixed <sup>b</sup>  |                   |
| <i>3</i><br>NDI-Pt-PTZ | 0.16                | 0.33                | 0.26                |                   |
|                        | 2.1                 | 3.6                 | 4.5                 |                   |
|                        | 88                  | 61                  | 126                 |                   |
|                        | 929                 | 1191                | 793                 |                   |
|                        | 6225                | 5810                | 5805                |                   |

**Table S1.** A summary of the lifetimes obtained from GLA fittings of the TA and TRIR data of complexes **1**, **2** and **3**.

<sup>a</sup>Lifetimes obtained from a monoexponential tail fitting of transient absorption decay traces obtained from flash photolysis experiments. <sup>b</sup>Using a fixed lifetime obtained from flash photolysis. <sup>c</sup>GLA extracted a 0.02 ps component which indicates this trace lifetime is shorter than IRF of FLUPS setup.

**2.9 Scheme S1. Comparison of energy level diagrams and timescales for compound 3, NDI-Pt-PTZ (left side) and its NAP analog, NAP-Pt-PTZ.**

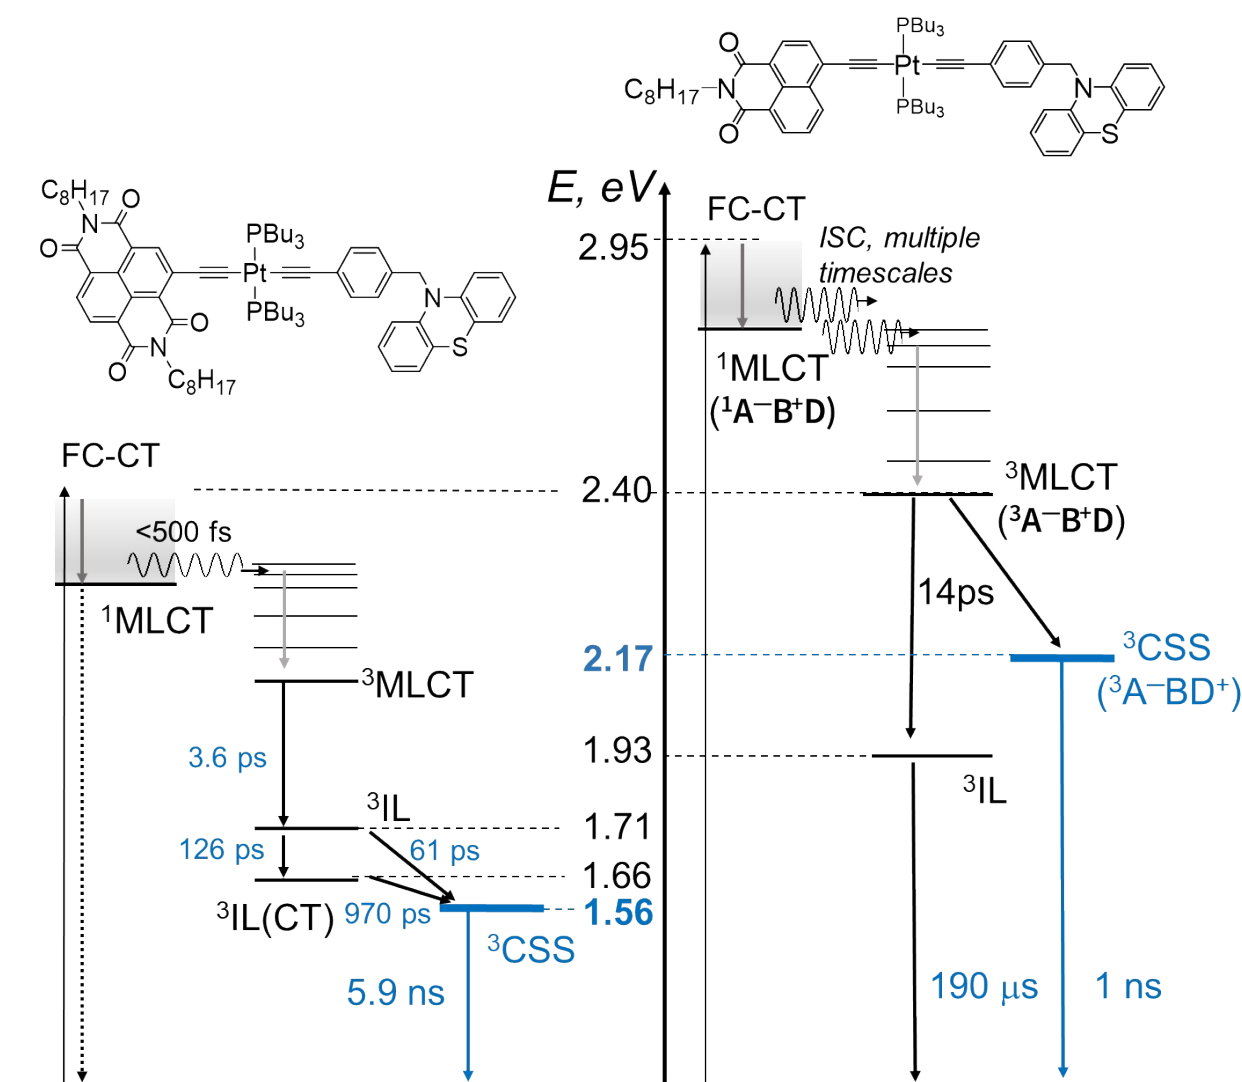

**Scheme S1.**

Comparison of energy level diagrams and timescales for compound 3, NDI-Pt-PTZ (left side) and its NAP analog, NAP-Pt-PTZ.

Data for NAP-Pt-PTZ taken from ref. 2, P. A. Scattergood, M. Delor, I. V. Sazanovich, O. V. Bouganov, S. A. Tikhomirov, A. S. Stasheuski, A. W. Parker, G. M. Greetham, M. Towrie, E. S. Davies, A. J. H. M. Meijer and J. A. Weinstein, *Dalt. Trans.*, 2014, **43**, 17677–17693.

### 3 Further experimental information

#### Global Lifetime Analysis (GLA)

Global lifetime analysis (GLA)<sup>15</sup> of the data was performed using Glotaran 1.5.1. A free software package that serves as a GUI for the R-package TIMP. Details of the software are described elsewhere.<sup>16,17</sup> Such software packages fit the kinetic traces with a sum of decaying exponential functions, like those given below, convoluted with a gaussian function to model the instrument response function.

$$\Delta A(t, \lambda_i) = \sum_{n=1}^{n_{comp}} B_n(\lambda_i) e^{-t/\tau_n} = B_1(\lambda_i) e^{-t/\tau_1} + B_2(\lambda_i) e^{-t/\tau_2} \dots$$

The total number of decaying exponential functions summed is given by  $n_{comp}$ , i.e., the number of components. Such a function is then convoluted with an IRF function.

#### Time-Resolved Infrared Spectroscopy

A fraction of the amplifier output was used to pump a fs-NOPA TOPAS which was used to provide 520 nm excitation pulses. The probe and pump beams were focussed onto a Harrick cell (CaF<sub>2</sub> windows, 630  $\mu\text{m}$  internal path) to yield spot sizes of 70  $\mu\text{m}$  and 120  $\mu\text{m}$  at the sample, respectively. The sample solution was flowed through the cell using a peristaltic pump, while the cell was simultaneously raster-scanned to avoid decomposition. The relative polarisation between the pump and probe was set to magic angle. The IR light transmitted through the sample was recorded using two, linear, 128 array HgCdTe detectors (Infrared Associates). The data was analysed using the same software packages described above.

#### Nanosecond flash photolysis

500 nm excitation pulses (7 ns FWHM, 10 Hz, 2.5 mW) were provided by a Beta-Barium Borate optical parametric oscillator (LT-2214OPO), which was pumped by the 355 nm (7 ns FWHM, 10 Hz, 56 mJ) output of a Q-switched Nd:YAG laser (LS-2137U). Sample probing was performed with a steady state 150 W Hamamatsu arc Xe lamp. The probe light transmitted through the sample was passed through a monochromator and detected with a home-built unit based on a FEU 118 PMT, coupled to a Tektronix TDS 3032B digital oscilloscope. Sample solutions were prepared in 1 cm quartz cells.

#### Cyclic Voltammetry

Experiments were performed using an Autolab Potentiostat 100. The measurements were taken in a glass sample tube using a glassy carbon working electrode, a platinum wire counter electrode and an Ag/AgCl (0.1 mol dm<sup>-3</sup>) reference electrode. Solutions of the analyte were prepared with 0.2 mol dm<sup>-3</sup> [NBu<sub>4</sub>][PF<sub>6</sub>] supporting electrolyte in dry DCM and saturated with N<sub>2</sub>. All potentials were quoted relative to the ferrocene/ferrocenium couple (Fc/Fc<sup>+</sup>).

#### IR and UV-Vis Spectroelectrochemistry

Measurements were carried out using an Autolab Potentiostat. Solutions of the analyte were prepared with 0.2 mol dm<sup>-3</sup> [NBu<sub>4</sub>][PF<sub>6</sub>] supporting electrolyte in dry DCM. Measurements were performed in an optically transparent thin-layer electrochemical (OTTLE) cell, with platinum mesh working and counter electrodes, a silver wire pseudoreference electrode and CaF<sub>2</sub> windows. IR and UV-vis spectra were recorded using a PerkinElmer Spectrum One FTIR spectrometer and an Agilent Cary 5000 UV-vis-NIR spectrometer, respectively.





## 4 Theoretical results

### 4.1 Simulated electronic absorption spectra

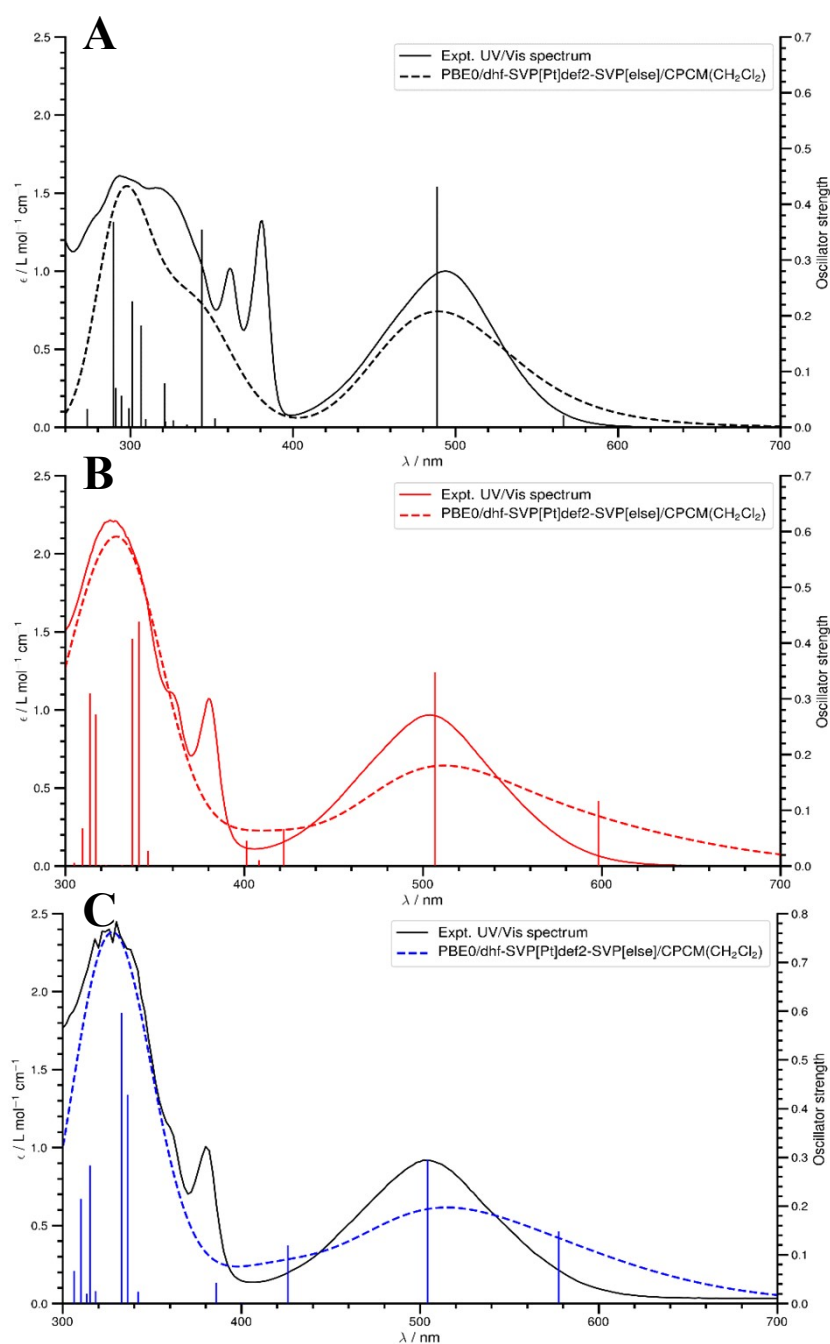

Fig.S13. Experimental electronic absorption spectra (solid traces) of complex 1, 2 and 3 (panel A, B and C, respectively) and the calculated electronic spectra of the ground state at the PBE0//dhf-SVP[Pt]-SVP[else]CPCM( $\text{CH}_2\text{Cl}_2$ ) (dashed traces).

## 4.2 Simulated vibrational absorption spectra

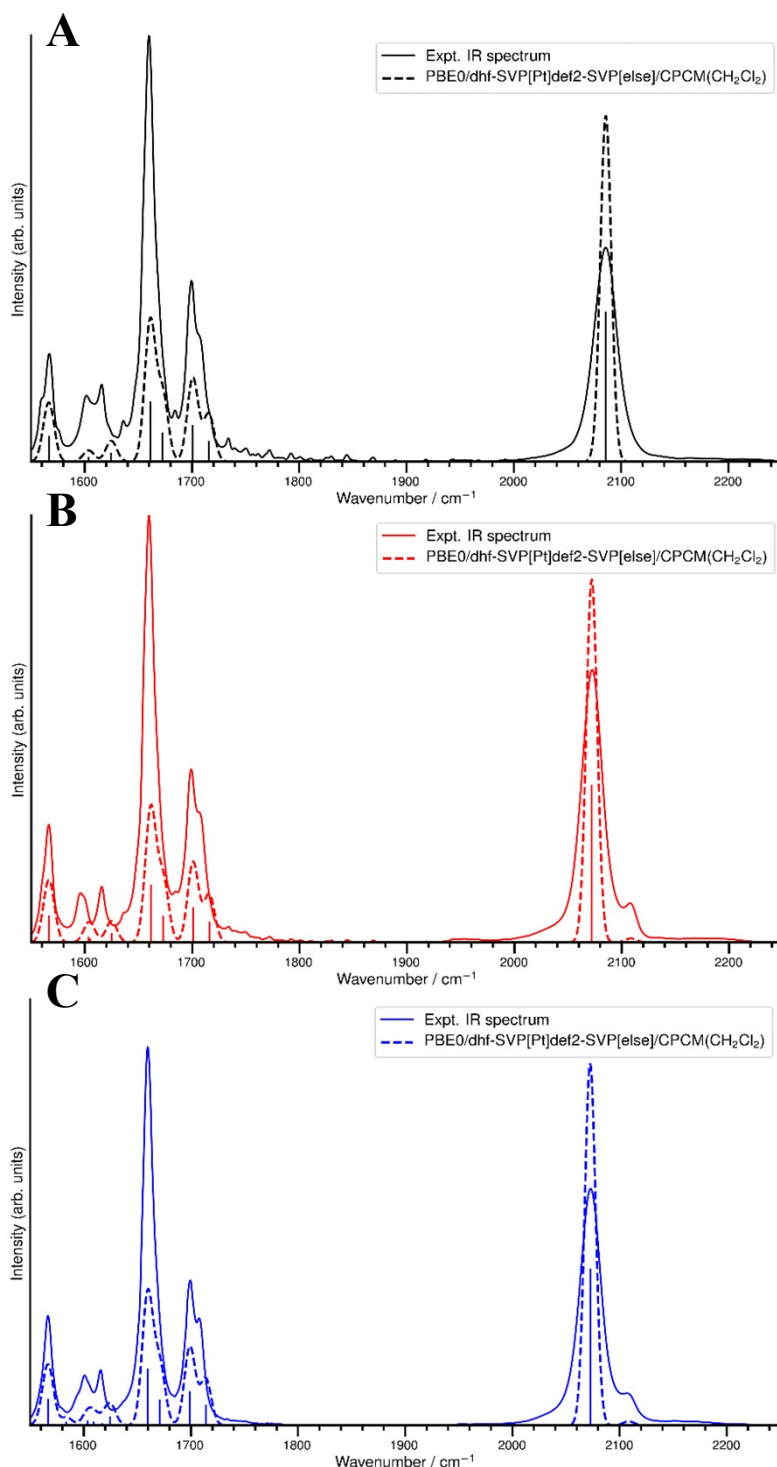

Fig.S14. Experimental vibrational absorption spectra (solid traces) of complex 1, 2 and 3 (panel A, B and C, respectively) and the calculated vibrational spectra of the ground state at the PBE0//dhf-SVP[Pt]-SVP[else]CPCM( $\text{CH}_2\text{Cl}_2$ ) (dashed traces). Scaling factors are as follows: 0.955 (1450 – 1729  $\text{cm}^{-1}$ ) for A, B and C / 0.94 (1730 – 1850  $\text{cm}^{-1}$ ) for A and B, 0.939 (1730 – 1850  $\text{cm}^{-1}$ ) for C / 0.955 (1851 – 2300  $\text{cm}^{-1}$ ) for A, B and C.

### 4.3 Density difference plots of the first 4 singlet excited states vs. the ground state in 1-3

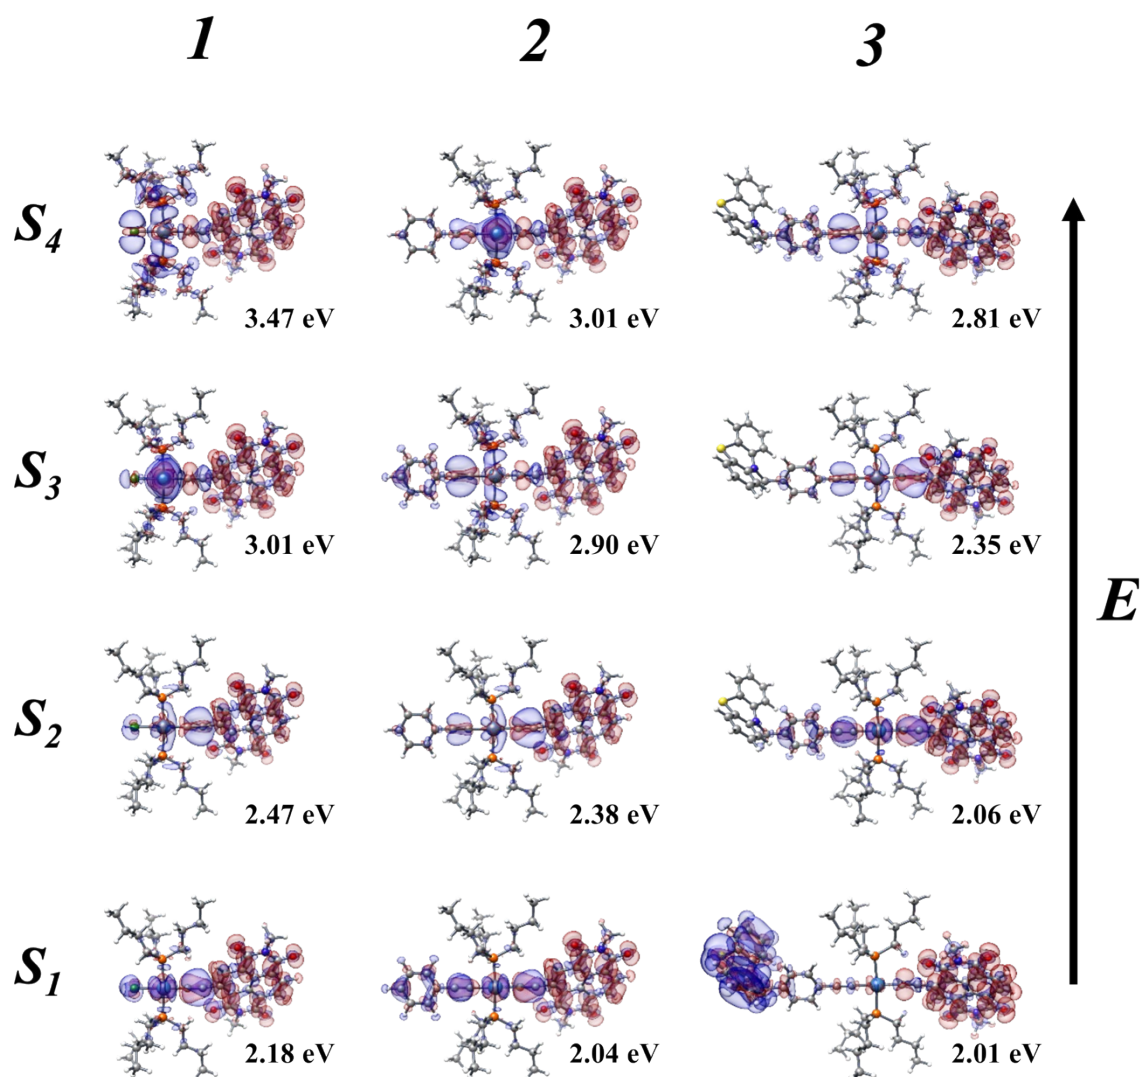

Fig.S15. Electron density difference plots of the first four singlet excited states of complex 1, 2 and 3. The electron density difference is relative to the ground state electron density distribution. Blue shaded regions represent a loss in electron density (relative of the ground state), while red shade regions represent an increase in electron density. For 1, 2 and 3, the geometries are the ground state optimised geometries.

4.4 Density difference plots on the lowest 4 triplet states relative to the ground state.

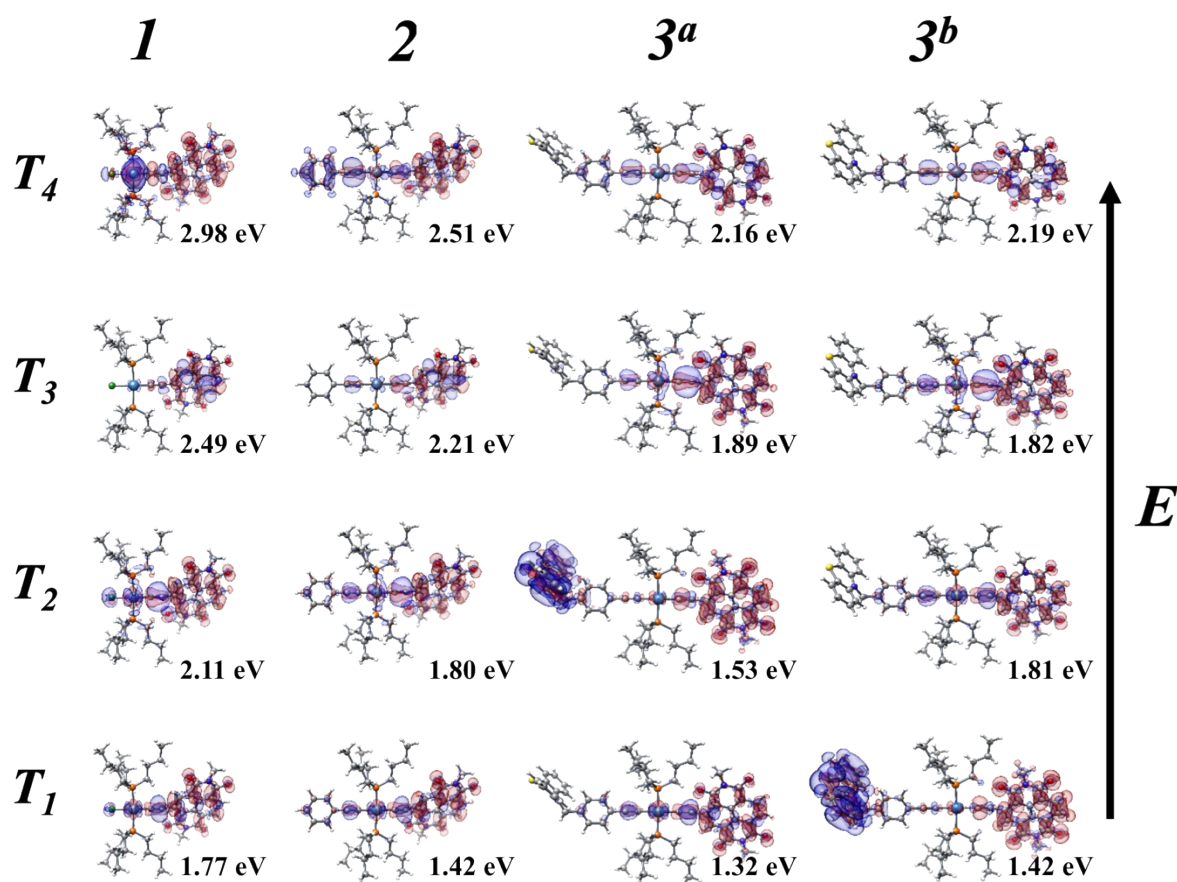

Fig.S16. Electron density difference plots of the first four triplet excited states of complex **1** - **3**. The electron density difference is relative to the ground state electron density distribution. Blue-shaded regions represent a loss in electron density (relative of the ground state), while red-shaded regions represent an increase in electron density. For **1**, **2** and **3<sup>a</sup>**, the geometries are the ground state optimised geometries. For **3<sup>b</sup>** the PTZ donor group is planar, unlike in the ground state optimised geometry where it is puckered.

## 4.5 Experimental ground state and excited state vibrational spectra overlaid with calculated spectra, and electron density maps

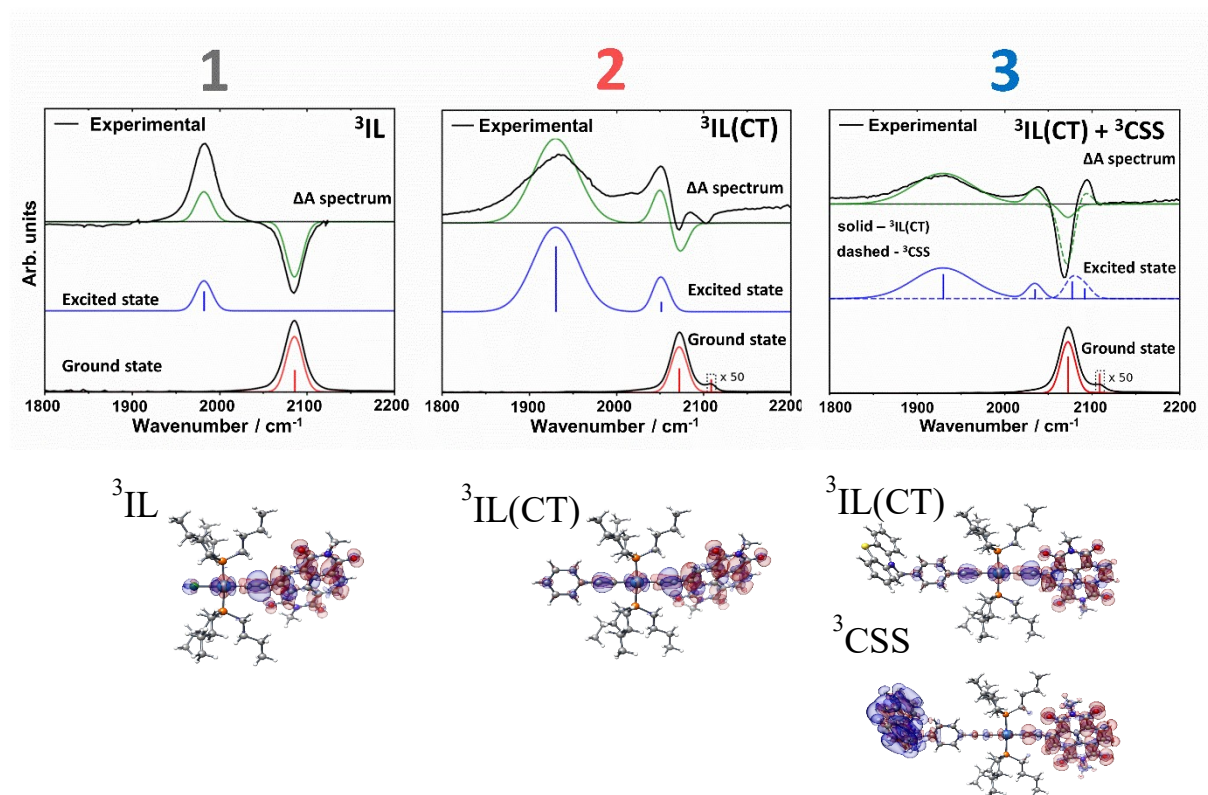

Fig.S17. Experimental ground state and excited state vibrational spectra, in the region 1800 – 2200  $\text{cm}^{-1}$ , overlaid with the simulated spectra, for **1–3**. The experimental TRIR difference spectra are at a pump-probe delay of 2.7 ns. The density difference plots associated with the excited states responsible for the difference spectra signal are also given below.

## 5 Additional computational details

### 1: Cl-Pt-CC-NDI in CH<sub>2</sub>Cl<sub>2</sub> SINGLET

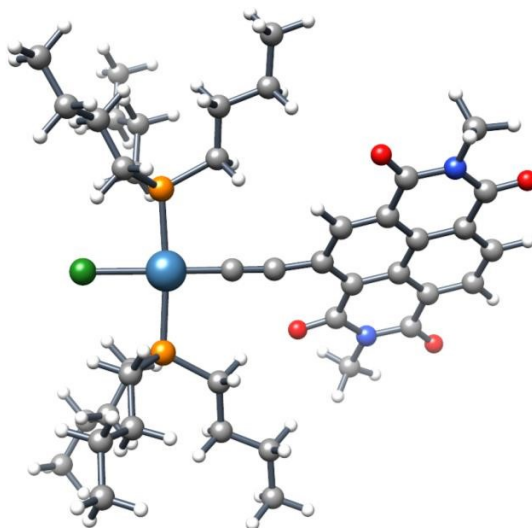

Optimised singlet ground state geometry of Cl-Pt-CC-NDI.

Route : #p opt freq pbe1pbe/genecp  
: scrf=(cpcm,solvent=dichloromethane) geom=connectivity  
: int=(acc2e=13,ultrafine)  
SMILES : CCCC[P](CCCC)(CCCC)[Pt]  
: (C#Cc1cc2c3c(ccc4c3c1C(=O)N(C4=O)C)  
: C(=O)N(C2=O)C)([P](CCCC)(CCCC)CCCC)Cl  
Formula : C<sub>42</sub>H<sub>63</sub>ClN<sub>2</sub>O<sub>4</sub>P<sub>2</sub>Pt  
Charge : 0  
Multiplicity : 1  
Dipole : 7.9749 Debye  
Energy : -3306.83205822 a.u.  
Gibbs Energy : -3305.95602200 a.u.  
Number of imaginary frequencies : 0

Cartesian Co-ordinates (XYZ format)

115

|   |            |             |             |
|---|------------|-------------|-------------|
| C | 2.22091389 | 3.12823892  | 1.95260203  |
| H | 1.95422304 | 2.28128290  | 2.60740089  |
| H | 3.31605506 | 3.06996202  | 1.83123505  |
| C | 1.28287005 | -3.06246591 | -0.56084698 |

|   |             |             |             |
|---|-------------|-------------|-------------|
| H | 0.85339999  | -2.87986398 | -1.56183600 |
| H | 0.51067001  | -2.73095608 | 0.15225200  |
| C | 3.62706304  | -1.87297702 | -1.95727301 |
| H | 3.07018709  | -1.20449495 | -2.63584089 |
| H | 4.55769587  | -1.33255196 | -1.71464503 |
| C | 3.73509693  | -2.39351702 | 0.99393398  |
| H | 4.25764322  | -1.47197998 | 1.29707801  |
| H | 3.04629993  | -2.64829397 | 1.81864500  |
| C | 3.90610600  | -3.19645596 | -2.66140103 |
| H | 2.95303702  | -3.68402195 | -2.92843390 |
| H | 4.43106079  | -3.89416003 | -1.98935497 |
| C | 4.73544502  | -3.00564599 | -3.92804599 |
| H | 5.68982887  | -2.51741290 | -3.66314292 |
| H | 4.21333122  | -2.30014610 | -4.59830809 |
| C | 5.01110888  | -4.30665207 | -4.66558409 |
| H | 5.61129522  | -4.13657618 | -5.57240915 |
| H | 5.56290102  | -5.01785707 | -4.02981091 |
| H | 4.07422781  | -4.79834795 | -4.97381592 |
| C | 1.57511699  | -4.54585123 | -0.35468900 |
| H | 2.36299610  | -4.89634991 | -1.04108405 |
| H | 1.96212006  | -4.70759487 | 0.66597700  |
| C | 0.32792601  | -5.40384817 | -0.54654199 |
| H | -0.06538000 | -5.24580097 | -1.56636596 |
| H | -0.45888099 | -5.04490900 | 0.13922200  |
| C | 0.57909501  | -6.88604689 | -0.31741101 |
| H | -0.33715600 | -7.47825098 | -0.46395901 |
| H | 1.34132802  | -7.27542305 | -1.01177704 |
| H | 0.93851399  | -7.07735777 | 0.70676500  |
| C | 4.75490284  | -3.50566602 | 0.76734602  |
| H | 4.26468801  | -4.42552519 | 0.41021299  |
| H | 5.45902920  | -3.20233703 | -0.02608400 |
| C | 5.54581594  | -3.82157207 | 2.03344393  |
| H | 6.02881813  | -2.89744401 | 2.39681005  |
| H | 4.84447098  | -4.12707996 | 2.82994008  |
| C | 6.59426117  | -4.90414286 | 1.82978499  |
| H | 7.33020210  | -4.60942793 | 1.06424797  |
| H | 7.14621019  | -5.11087418 | 2.75936198  |
| H | 6.13452291  | -5.84932899 | 1.49841797  |
| C | 1.79189897  | 4.43614006  | 2.60910010  |
| H | 0.69912797  | 4.43451691  | 2.76165509  |
| H | 2.00984097  | 5.29376316  | 1.95267797  |
| C | 2.47776294  | 4.65212584  | 3.95503902  |
| H | 2.26705003  | 3.78851104  | 4.61023188  |
| H | 3.57175112  | 4.65526390  | 3.80491590  |
| C | 2.04975009  | 5.93768787  | 4.64541721  |
| H | 2.27986908  | 6.81999588  | 4.02649307  |
| H | 0.96506900  | 5.94544077  | 4.84009790  |
| H | 2.56184793  | 6.06632090  | 5.61115122  |
| C | -0.63362098 | 4.57259178  | 0.01659100  |
| H | -0.18284599 | 5.23896313  | 0.76964903  |
| H | -0.24126200 | 4.90210199  | -0.96053398 |

|    |             |             |             |
|----|-------------|-------------|-------------|
| C  | -2.14832997 | 4.76047993  | 0.02842000  |
| H  | -2.60544705 | 4.09419107  | -0.72431397 |
| H  | -2.54450989 | 4.42775106  | 1.00415397  |
| C  | -2.57397699 | 6.19669294  | -0.23447400 |
| H  | -3.66957593 | 6.30104780  | -0.21889900 |
| H  | -2.16325307 | 6.88202620  | 0.52462202  |
| H  | -2.22086000 | 6.54484987  | -1.21866298 |
| C  | 2.77916288  | 5.09706020  | -0.72585100 |
| H  | 3.45839095  | 5.14766693  | 0.14212300  |
| H  | 1.88951302  | 5.68873501  | -0.45676899 |
| C  | 3.46326995  | 5.74459410  | -1.92626798 |
| H  | 4.34978008  | 5.14683819  | -2.20208311 |
| H  | 2.78549790  | 5.69603300  | -2.79684091 |
| C  | 3.87315702  | 7.18737221  | -1.67513299 |
| H  | 3.00062299  | 7.81446123  | -1.43022394 |
| H  | 4.57959414  | 7.26183891  | -0.83259898 |
| H  | 4.36125183  | 7.62722778  | -2.55817103 |
| C  | 0.12265100  | -0.06847700 | -0.06195900 |
| C  | -1.07681501 | -0.36197200 | -0.02418100 |
| C  | -2.48225689 | -0.50028098 | -0.07099600 |
| C  | -3.24210501 | -1.48486495 | 0.59449297  |
| C  | -3.18443108 | 0.46932501  | -0.85545099 |
| C  | -4.65801001 | -1.48711395 | 0.48324999  |
| C  | -2.59545898 | -2.52593803 | 1.41852498  |
| C  | -4.55167913 | 0.47638801  | -0.96289802 |
| H  | -2.61316800 | 1.23343694  | -1.38395202 |
| C  | -5.44656992 | -2.45749998 | 1.14549696  |
| C  | -5.32240009 | -0.50684500 | -0.29741800 |
| O  | -1.39111197 | -2.62080193 | 1.56279099  |
| N  | -3.42353296 | -3.45166397 | 2.06291103  |
| C  | -5.22045708 | 1.52290905  | -1.77384496 |
| C  | -4.80933619 | -3.49836898 | 1.98130095  |
| C  | -6.82927084 | -2.44771194 | 1.02620900  |
| C  | -6.72630405 | -0.51171798 | -0.40711999 |
| C  | -2.74743295 | -4.45448017 | 2.86956191  |
| O  | -4.60753012 | 2.40143204  | -2.34780788 |
| N  | -6.60757303 | 1.46720302  | -1.85409796 |
| O  | -5.45567608 | -4.34772205 | 2.56546092  |
| C  | -7.47465277 | -1.47758496 | 0.24961799  |
| H  | -7.39949894 | -3.21432900 | 1.55377996  |
| C  | -7.41550398 | 0.51666898  | -1.22655702 |
| H  | -2.13798809 | -5.11147881 | 2.23258805  |
| H  | -2.08394098 | -3.96646690 | 3.59498405  |
| H  | -3.51193500 | -5.04270601 | 3.38478899  |
| C  | -7.24461412 | 2.49954009  | -2.65622807 |
| H  | -8.56122398 | -1.46452796 | 0.15096000  |
| O  | -8.62333488 | 0.53826499  | -1.34772301 |
| H  | -6.88409090 | 2.44809103  | -3.69257808 |
| H  | -8.32497025 | 2.33357692  | -2.62420988 |
| H  | -7.00116396 | 3.49259496  | -2.25467396 |
| Cl | 4.33674717  | 0.93443400  | 0.08161000  |



## Frequencies

| Mode | IR frequency | IR intensity |
|------|--------------|--------------|
| 1    | 9.31920000   | 0.00340000   |
| 2    | 9.97400000   | 0.01580000   |
| 3    | 11.64280000  | 0.11050000   |
| 4    | 15.25810000  | 0.32840000   |
| 5    | 17.17350000  | 0.32630000   |
| 6    | 25.93930000  | 0.57750000   |
| 7    | 35.75830000  | 0.05750000   |
| 8    | 37.77220000  | 0.01610000   |
| 9    | 39.01810000  | 0.04490000   |
| 10   | 40.31970000  | 0.02060000   |
| 11   | 40.60910000  | 0.03420000   |
| 12   | 44.33220000  | 0.20020000   |
| 13   | 50.83040000  | 0.03800000   |
| 14   | 52.78900000  | 0.16140000   |
| 15   | 54.05190000  | 0.19620000   |
| 16   | 57.93270000  | 0.10530000   |
| 17   | 60.07910000  | 0.41410000   |
| 18   | 65.84370000  | 0.28350000   |
| 19   | 65.99170000  | 0.66260000   |
| 20   | 70.20500000  | 0.61570000   |
| 21   | 73.51760000  | 0.32760000   |
| 22   | 76.10840000  | 0.79640000   |
| 23   | 76.89920000  | 0.64550000   |
| 24   | 79.42300000  | 1.77280000   |
| 25   | 81.10390000  | 0.04610000   |
| 26   | 82.63510000  | 1.80640000   |
| 27   | 89.72310000  | 3.51870000   |
| 28   | 94.70540000  | 4.93400000   |
| 29   | 101.48650000 | 4.30760000   |
| 30   | 107.62610000 | 2.63130000   |
| 31   | 113.53940000 | 1.42720000   |
| 32   | 114.94570000 | 1.40390000   |
| 33   | 118.06720000 | 0.95530000   |
| 34   | 130.87380000 | 0.95840000   |
| 35   | 133.59340000 | 3.61200000   |
| 36   | 135.52060000 | 5.49020000   |
| 37   | 136.48750000 | 10.09430000  |
| 38   | 139.37530000 | 2.36300000   |
| 39   | 142.97470000 | 2.25160000   |
| 40   | 148.15210000 | 1.07820000   |
| 41   | 153.05840000 | 2.00730000   |
| 42   | 159.56030000 | 1.57800000   |
| 43   | 164.15410000 | 1.94940000   |
| 44   | 166.90190000 | 2.30100000   |
| 45   | 169.35130000 | 1.34390000   |
| 46   | 171.16770000 | 0.69160000   |
| 47   | 176.63980000 | 3.96760000   |
| 48   | 179.43680000 | 2.16530000   |

|    |              |             |
|----|--------------|-------------|
| 49 | 185.83840000 | 0.24970000  |
| 50 | 197.43130000 | 0.25430000  |
| 51 | 211.99710000 | 15.38920000 |
| 52 | 216.41920000 | 0.34650000  |
| 53 | 221.68270000 | 1.29400000  |
| 54 | 222.84260000 | 1.32810000  |
| 55 | 224.16110000 | 0.89240000  |
| 56 | 233.75290000 | 0.01530000  |
| 57 | 234.80230000 | 0.09090000  |
| 58 | 256.41110000 | 0.00540000  |
| 59 | 257.24400000 | 4.44140000  |
| 60 | 257.73240000 | 0.12620000  |
| 61 | 257.92390000 | 0.00670000  |
| 62 | 258.67100000 | 0.46950000  |
| 63 | 258.75750000 | 0.08700000  |
| 64 | 259.11260000 | 0.42500000  |
| 65 | 273.64600000 | 0.30150000  |
| 66 | 294.87390000 | 48.13680000 |
| 67 | 299.15740000 | 0.52830000  |
| 68 | 302.03300000 | 1.74220000  |
| 69 | 322.75560000 | 0.11650000  |
| 70 | 334.78440000 | 3.78780000  |
| 71 | 335.53440000 | 0.43580000  |
| 72 | 339.41000000 | 0.88580000  |
| 73 | 340.87670000 | 9.95060000  |
| 74 | 343.28070000 | 21.05740000 |
| 75 | 362.66330000 | 7.38010000  |
| 76 | 371.88590000 | 41.55070000 |
| 77 | 376.71350000 | 7.57400000  |
| 78 | 383.93240000 | 4.00640000  |
| 79 | 389.37840000 | 28.24910000 |
| 80 | 404.03990000 | 0.18970000  |
| 81 | 409.26920000 | 0.09430000  |
| 82 | 409.79200000 | 94.70250000 |
| 83 | 411.15640000 | 23.13070000 |
| 84 | 414.41580000 | 10.82120000 |
| 85 | 420.48500000 | 4.12150000  |
| 86 | 421.64310000 | 0.56520000  |
| 87 | 457.37850000 | 17.31340000 |
| 88 | 461.65870000 | 0.16550000  |
| 89 | 476.34410000 | 6.88430000  |
| 90 | 490.82490000 | 20.69710000 |
| 91 | 505.77590000 | 93.43780000 |
| 92 | 521.58430000 | 33.99030000 |
| 93 | 525.39030000 | 33.22490000 |
| 94 | 561.37170000 | 20.49590000 |
| 95 | 576.60710000 | 3.37740000  |
| 96 | 588.98460000 | 8.64180000  |
| 97 | 597.31480000 | 16.33210000 |
| 98 | 613.36520000 | 4.36740000  |
| 99 | 635.38190000 | 0.76860000  |

|     |               |             |
|-----|---------------|-------------|
| 100 | 685.23270000  | 1.24690000  |
| 101 | 690.56400000  | 30.18090000 |
| 102 | 691.91190000  | 2.88500000  |
| 103 | 701.05660000  | 2.79630000  |
| 104 | 704.53650000  | 4.22630000  |
| 105 | 722.18490000  | 23.07550000 |
| 106 | 723.53670000  | 30.26250000 |
| 107 | 723.97880000  | 11.04560000 |
| 108 | 726.72360000  | 17.47310000 |
| 109 | 744.18560000  | 16.26610000 |
| 110 | 749.67280000  | 0.01690000  |
| 111 | 756.37220000  | 0.08410000  |
| 112 | 756.66450000  | 0.13840000  |
| 113 | 762.13390000  | 7.50350000  |
| 114 | 762.97500000  | 2.33470000  |
| 115 | 764.27790000  | 7.84590000  |
| 116 | 764.94410000  | 3.81530000  |
| 117 | 768.41380000  | 6.59690000  |
| 118 | 769.90760000  | 20.70270000 |
| 119 | 787.85580000  | 1.54980000  |
| 120 | 789.20200000  | 3.87970000  |
| 121 | 791.09660000  | 14.81440000 |
| 122 | 792.46850000  | 42.72750000 |
| 123 | 793.83080000  | 21.64100000 |
| 124 | 796.01780000  | 76.16310000 |
| 125 | 813.92640000  | 43.20510000 |
| 126 | 858.70500000  | 0.03440000  |
| 127 | 869.01030000  | 4.26320000  |
| 128 | 884.51380000  | 4.89540000  |
| 129 | 884.60200000  | 0.74370000  |
| 130 | 903.99470000  | 8.34310000  |
| 131 | 904.59060000  | 10.13230000 |
| 132 | 904.81740000  | 25.81640000 |
| 133 | 905.93820000  | 25.26420000 |
| 134 | 906.16660000  | 10.90020000 |
| 135 | 914.94300000  | 7.86590000  |
| 136 | 915.23040000  | 8.76400000  |
| 137 | 915.45400000  | 10.36950000 |
| 138 | 915.64090000  | 16.99070000 |
| 139 | 915.99900000  | 9.00870000  |
| 140 | 916.12900000  | 2.41230000  |
| 141 | 931.63600000  | 1.70340000  |
| 142 | 971.86540000  | 14.76370000 |
| 143 | 976.24980000  | 0.29520000  |
| 144 | 1027.04690000 | 0.01430000  |
| 145 | 1031.44020000 | 88.41500000 |
| 146 | 1035.87890000 | 2.76580000  |
| 147 | 1036.29410000 | 0.88520000  |
| 148 | 1048.79660000 | 22.73770000 |
| 149 | 1051.42280000 | 2.74660000  |
| 150 | 1051.70730000 | 2.84080000  |

|     |               |              |
|-----|---------------|--------------|
| 151 | 1052.01810000 | 3.74080000   |
| 152 | 1052.79730000 | 6.66820000   |
| 153 | 1053.44010000 | 8.39270000   |
| 154 | 1054.24840000 | 0.26530000   |
| 155 | 1066.73740000 | 102.46670000 |
| 156 | 1074.69650000 | 3.60150000   |
| 157 | 1075.37160000 | 4.31420000   |
| 158 | 1077.09820000 | 7.69940000   |
| 159 | 1078.59760000 | 10.33820000  |
| 160 | 1089.35240000 | 0.74910000   |
| 161 | 1089.56730000 | 0.72960000   |
| 162 | 1089.93530000 | 0.93160000   |
| 163 | 1090.26140000 | 4.13250000   |
| 164 | 1092.56660000 | 6.03990000   |
| 165 | 1092.99350000 | 0.97490000   |
| 166 | 1095.78720000 | 26.17000000  |
| 167 | 1116.48860000 | 15.43890000  |
| 168 | 1116.64460000 | 0.93530000   |
| 169 | 1117.35240000 | 26.56390000  |
| 170 | 1117.46770000 | 44.81230000  |
| 171 | 1120.92380000 | 128.28700000 |
| 172 | 1124.23830000 | 16.77310000  |
| 173 | 1140.67120000 | 0.96990000   |
| 174 | 1141.70350000 | 0.18300000   |
| 175 | 1163.09010000 | 97.30180000  |
| 176 | 1189.37010000 | 9.64090000   |
| 177 | 1205.22290000 | 172.91290000 |
| 178 | 1212.92010000 | 3.26020000   |
| 179 | 1214.47830000 | 1.60250000   |
| 180 | 1216.30520000 | 2.46560000   |
| 181 | 1216.56000000 | 2.26040000   |
| 182 | 1216.81580000 | 2.00250000   |
| 183 | 1217.80080000 | 4.07650000   |
| 184 | 1229.29410000 | 5.26650000   |
| 185 | 1230.02970000 | 16.42340000  |
| 186 | 1230.21260000 | 20.03940000  |
| 187 | 1230.80780000 | 13.55050000  |
| 188 | 1233.52770000 | 1.18760000   |
| 189 | 1248.79220000 | 38.55550000  |
| 190 | 1250.68050000 | 12.77990000  |
| 191 | 1253.08960000 | 43.74600000  |
| 192 | 1289.93430000 | 1.95000000   |
| 193 | 1290.86250000 | 2.12920000   |
| 194 | 1293.68290000 | 3.69640000   |
| 195 | 1295.83020000 | 2.05200000   |
| 196 | 1297.34860000 | 5.58350000   |
| 197 | 1298.07350000 | 4.97710000   |
| 198 | 1308.30900000 | 248.05970000 |
| 199 | 1317.93720000 | 6.61660000   |
| 200 | 1318.10010000 | 4.18710000   |
| 201 | 1318.36700000 | 2.62470000   |

|     |               |              |
|-----|---------------|--------------|
| 202 | 1318.75340000 | 3.05860000   |
| 203 | 1319.37230000 | 1.26980000   |
| 204 | 1320.30200000 | 3.57920000   |
| 205 | 1320.80570000 | 1.33330000   |
| 206 | 1320.97680000 | 0.20230000   |
| 207 | 1322.13030000 | 6.96350000   |
| 208 | 1322.75470000 | 3.04040000   |
| 209 | 1326.29660000 | 23.72790000  |
| 210 | 1329.18210000 | 10.38240000  |
| 211 | 1334.79020000 | 318.46900000 |
| 212 | 1347.06410000 | 667.76650000 |
| 213 | 1370.92200000 | 128.35790000 |
| 214 | 1380.79240000 | 0.23380000   |
| 215 | 1381.01200000 | 0.21750000   |
| 216 | 1381.31050000 | 0.29990000   |
| 217 | 1382.08000000 | 0.15530000   |
| 218 | 1384.00600000 | 0.44110000   |
| 219 | 1384.56360000 | 0.20600000   |
| 220 | 1388.83070000 | 353.71350000 |
| 221 | 1398.32190000 | 0.28570000   |
| 222 | 1398.52290000 | 0.73090000   |
| 223 | 1398.79720000 | 0.66690000   |
| 224 | 1398.91150000 | 0.97250000   |
| 225 | 1401.08220000 | 16.34450000  |
| 226 | 1401.36930000 | 3.55800000   |
| 227 | 1403.95640000 | 32.39140000  |
| 228 | 1414.70850000 | 120.73550000 |
| 229 | 1415.62580000 | 72.69060000  |
| 230 | 1422.00820000 | 28.03020000  |
| 231 | 1422.50780000 | 3.39770000   |
| 232 | 1424.41860000 | 19.94490000  |
| 233 | 1426.55130000 | 17.14600000  |
| 234 | 1429.94220000 | 30.04970000  |
| 235 | 1442.74580000 | 145.59800000 |
| 236 | 1447.78900000 | 5.27010000   |
| 237 | 1447.89270000 | 0.79950000   |
| 238 | 1449.43710000 | 1.57280000   |
| 239 | 1449.57540000 | 1.82110000   |
| 240 | 1450.76270000 | 2.33200000   |
| 241 | 1450.79870000 | 3.01160000   |
| 242 | 1453.92810000 | 29.24450000  |
| 243 | 1456.11150000 | 18.35320000  |
| 244 | 1458.43410000 | 9.47970000   |
| 245 | 1458.48130000 | 8.66430000   |
| 246 | 1458.55730000 | 9.69380000   |
| 247 | 1458.61400000 | 9.64220000   |
| 248 | 1458.71840000 | 10.46130000  |
| 249 | 1458.89010000 | 10.10820000  |
| 250 | 1460.35880000 | 0.39190000   |
| 251 | 1460.48100000 | 0.51480000   |
| 252 | 1462.06490000 | 20.08700000  |

|     |               |               |
|-----|---------------|---------------|
| 253 | 1465.18870000 | 0.77590000    |
| 254 | 1465.43400000 | 21.83640000   |
| 255 | 1465.50580000 | 29.36150000   |
| 256 | 1465.64170000 | 0.26900000    |
| 257 | 1465.80350000 | 22.82350000   |
| 258 | 1473.72160000 | 5.75060000    |
| 259 | 1473.75630000 | 5.12160000    |
| 260 | 1476.36730000 | 168.19720000  |
| 261 | 1476.83870000 | 16.06010000   |
| 262 | 1476.93920000 | 16.72760000   |
| 263 | 1477.61480000 | 22.39460000   |
| 264 | 1477.66760000 | 14.83300000   |
| 265 | 1491.40530000 | 300.08600000  |
| 266 | 1501.92750000 | 331.59780000  |
| 267 | 1521.03630000 | 275.68760000  |
| 268 | 1570.66000000 | 32.31280000   |
| 269 | 1638.58390000 | 463.08590000  |
| 270 | 1677.46340000 | 87.46170000   |
| 271 | 1699.57770000 | 162.22680000  |
| 272 | 1767.05770000 | 1091.00970000 |
| 273 | 1779.56250000 | 517.10010000  |
| 274 | 1809.35600000 | 655.16180000  |
| 275 | 1825.27470000 | 371.72790000  |
| 276 | 2184.02460000 | 2709.44290000 |
| 277 | 3044.37620000 | 28.24440000   |
| 278 | 3044.64560000 | 35.08830000   |
| 279 | 3044.73880000 | 41.08420000   |
| 280 | 3044.82600000 | 26.96220000   |
| 281 | 3045.00230000 | 32.80240000   |
| 282 | 3045.84520000 | 34.73860000   |
| 283 | 3047.77850000 | 21.74970000   |
| 284 | 3047.80770000 | 20.94200000   |
| 285 | 3048.12670000 | 18.65610000   |
| 286 | 3048.23080000 | 27.26820000   |
| 287 | 3048.24660000 | 46.30950000   |
| 288 | 3048.34580000 | 33.31070000   |
| 289 | 3056.66270000 | 38.58110000   |
| 290 | 3057.45210000 | 31.23020000   |
| 291 | 3057.67940000 | 0.74190000    |
| 292 | 3058.96590000 | 34.85860000   |
| 293 | 3060.01070000 | 42.64220000   |
| 294 | 3060.41490000 | 19.15140000   |
| 295 | 3064.23400000 | 44.03660000   |
| 296 | 3065.24230000 | 38.23030000   |
| 297 | 3065.54200000 | 39.86100000   |
| 298 | 3066.77170000 | 30.96690000   |
| 299 | 3067.41440000 | 36.42170000   |
| 300 | 3070.65650000 | 21.09410000   |
| 301 | 3085.06360000 | 28.46520000   |
| 302 | 3086.90320000 | 27.84140000   |
| 303 | 3089.58700000 | 10.54290000   |

|     |               |             |
|-----|---------------|-------------|
| 304 | 3089.64160000 | 7.33070000  |
| 305 | 3089.66520000 | 11.96500000 |
| 306 | 3089.94460000 | 15.67780000 |
| 307 | 3090.04350000 | 7.71730000  |
| 308 | 3092.80410000 | 3.73090000  |
| 309 | 3114.94670000 | 7.05500000  |
| 310 | 3114.97960000 | 48.35870000 |
| 311 | 3115.57400000 | 7.75410000  |
| 312 | 3116.45950000 | 17.03190000 |
| 313 | 3116.83120000 | 23.97280000 |
| 314 | 3117.48920000 | 18.24300000 |
| 315 | 3130.38390000 | 15.83490000 |
| 316 | 3131.03120000 | 11.51840000 |
| 317 | 3132.12260000 | 16.67650000 |
| 318 | 3133.50180000 | 1.86530000  |
| 319 | 3133.91360000 | 6.38830000  |
| 320 | 3136.34320000 | 0.60640000  |
| 321 | 3137.21090000 | 55.93270000 |
| 322 | 3138.16450000 | 56.79070000 |
| 323 | 3138.24920000 | 50.33330000 |
| 324 | 3138.36770000 | 66.00790000 |
| 325 | 3138.41610000 | 59.01500000 |
| 326 | 3138.50110000 | 74.21820000 |
| 327 | 3145.61470000 | 34.00140000 |
| 328 | 3146.93980000 | 36.05630000 |
| 329 | 3146.97020000 | 34.27030000 |
| 330 | 3147.09460000 | 29.94310000 |
| 331 | 3147.20200000 | 36.27280000 |
| 332 | 3147.37340000 | 30.38730000 |
| 333 | 3177.61560000 | 8.56460000  |
| 334 | 3178.85210000 | 7.39570000  |
| 335 | 3233.88180000 | 2.17300000  |
| 336 | 3234.94960000 | 2.64220000  |
| 337 | 3237.45590000 | 1.33320000  |
| 338 | 3245.40330000 | 0.72680000  |
| 339 | 3248.04790000 | 0.79630000  |

## 2: Cl-Pt-CC-NDI in CH<sub>2</sub>Cl<sub>2</sub> TRIPLET

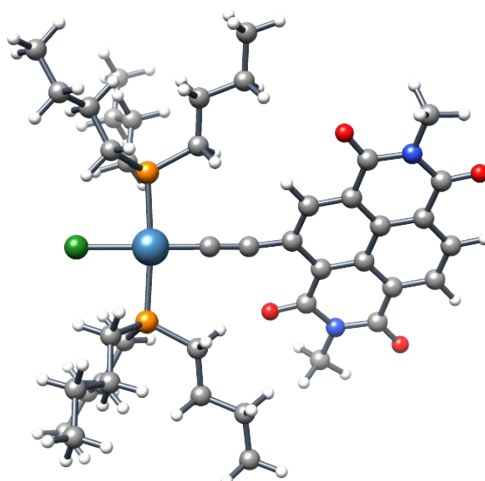

Optimised triplet ground state geometry of Cl-Pt-CC-NDI.

Route : #p opt freq genecp  
: scrf=(cpcm,solvent=dichloromethane) geom=connectivity  
: int=(acc2e=13,ultrafine) pbe1pbe  
SMILES : CCCC[P](CCCC)(CCCC)[Pt]  
: (C#Cc1cc2c3c(ccc4c3c1C(=O)N(C4=O)C)  
: C(=O)N(C2=O)C)([P](CCCC)(CCCC)CCCC)Cl  
Formula : C<sub>42</sub>H<sub>63</sub>ClN<sub>2</sub>O<sub>4</sub>P<sub>2</sub>Pt<sup>3</sup>  
Charge : 0  
Multiplicity : 3  
Dipole : 35.6730 Debye  
Energy : -3306.77342362 a.u.  
Gibbs Energy : -3305.90077700 a.u.  
Number of imaginary frequencies : 0

Cartesian Co-ordinates (XYZ format)

115

|    |             |             |             |
|----|-------------|-------------|-------------|
| Pt | 1.99737000  | 0.33224899  | -0.06121000 |
| P  | 1.67289603  | 2.65889096  | 0.24825400  |
| P  | 2.53574896  | -1.95172000 | -0.38566601 |
| C  | 2.61632609  | 3.56862712  | -1.04215395 |
| H  | 3.50081897  | 2.93824911  | -1.22652805 |
| H  | 1.99427795  | 3.50784898  | -1.95247805 |
| C  | -0.08004000 | 3.20106697  | 0.16167700  |
| H  | -0.54788297 | 2.84203410  | 1.09501803  |
| H  | -0.52202600 | 2.58995104  | -0.64081299 |



|   |             |             |             |
|---|-------------|-------------|-------------|
| C | 2.33521891  | 3.08483601  | 1.91077197  |
| H | 2.00555706  | 2.25652790  | 2.56062889  |
| H | 3.42799592  | 2.96657801  | 1.81535995  |
| C | 1.09311295  | -3.04561210 | -0.67500401 |
| H | 0.75403202  | -2.81178594 | -1.69987905 |
| H | 0.30203399  | -2.67529607 | -0.00196800 |
| C | 3.63385201  | -2.03962398 | -1.86053002 |
| H | 3.18597388  | -1.33386898 | -2.58075905 |
| H | 4.57808399  | -1.56946099 | -1.53844202 |
| C | 3.45116401  | -2.54954696 | 1.09325504  |
| H | 4.01825094  | -1.66810799 | 1.43341100  |
| H | 2.67727995  | -2.73636508 | 1.85836399  |
| C | 3.87507296  | -3.38198805 | -2.54315996 |
| H | 2.91691995  | -3.79650307 | -2.89958811 |
| H | 4.28272486  | -4.11575699 | -1.82945502 |
| C | 4.82979918  | -3.25441504 | -3.72669792 |
| H | 5.78924894  | -2.83861589 | -3.37196803 |
| H | 4.42552280  | -2.51292300 | -4.43816614 |
| C | 5.07441711  | -4.57366896 | -4.44234514 |
| H | 5.76667690  | -4.44992590 | -5.28897810 |
| H | 5.51085281  | -5.32291985 | -3.76222491 |
| H | 4.13602114  | -4.99445295 | -4.83825779 |
| C | 1.26036501  | -4.55058479 | -0.48223600 |
| H | 2.09890199  | -4.94169903 | -1.08039200 |
| H | 1.50961006  | -4.75859118 | 0.57238102  |
| C | -0.00931100 | -5.31336498 | -0.84861702 |
| H | -0.25262499 | -5.11978483 | -1.90821099 |
| H | -0.85185498 | -4.90300608 | -0.26597199 |
| C | 0.10248500  | -6.81124306 | -0.61204100 |
| H | -0.82490999 | -7.33368921 | -0.89213401 |
| H | 0.92305499  | -7.25025988 | -1.20242798 |
| H | 0.30305901  | -7.03477812 | 0.44836599  |
| C | 4.39425707  | -3.74221301 | 0.96162897  |
| H | 3.86114907  | -4.62590313 | 0.57606798  |
| H | 5.18168688  | -3.50884295 | 0.22501500  |
| C | 5.05186987  | -4.09675407 | 2.29208994  |
| H | 5.57683897  | -3.20747900 | 2.68309307  |
| H | 4.26592779  | -4.33131599 | 3.03147292  |
| C | 6.02264595  | -5.26252890 | 2.18706989  |
| H | 6.83954716  | -5.04073715 | 1.48146296  |
| H | 6.47871304  | -5.49540901 | 3.16129303  |
| H | 5.51652193  | -6.17398405 | 1.83001602  |
| C | 1.96507895  | 4.41800785  | 2.55272698  |
| H | 0.87103999  | 4.47761822  | 2.68135095  |
| H | 2.24543810  | 5.25861120  | 1.89806199  |
| C | 2.63319612  | 4.60057116  | 3.91241503  |
| H | 2.35963511  | 3.75336695  | 4.56569719  |
| H | 3.72854400  | 4.54151583  | 3.78601289  |
| C | 2.26322103  | 5.91161489  | 4.58816910  |
| H | 2.55653691  | 6.77642488  | 3.97135997  |
| H | 1.17676103  | 5.98135281  | 4.75874901  |

|    |             |             |             |
|----|-------------|-------------|-------------|
| H  | 2.76056600  | 6.01548195  | 5.56445408  |
| C  | -0.39616099 | 4.67364788  | -0.08268300 |
| H  | 0.09051500  | 5.31168795  | 0.67228699  |
| H  | 0.01532000  | 4.98179483  | -1.05888295 |
| C  | -1.89814496 | 4.94535589  | -0.06934000 |
| H  | -2.39881706 | 4.29728699  | -0.80976099 |
| H  | -2.30726409 | 4.64841795  | 0.91256100  |
| C  | -2.24236798 | 6.40017986  | -0.34842500 |
| H  | -3.33025789 | 6.56568193  | -0.32871899 |
| H  | -1.78934002 | 7.07108688  | 0.39942300  |
| H  | -1.87632895 | 6.71498299  | -1.33909404 |
| C  | 3.05868602  | 5.00452185  | -0.77423197 |
| H  | 3.71751904  | 5.02735281  | 0.11036600  |
| H  | 2.19553995  | 5.64593506  | -0.53448498 |
| C  | 3.80729795  | 5.59963989  | -1.96326697 |
| H  | 4.66733408  | 4.95211077  | -2.20873499 |
| H  | 3.15056491  | 5.57685804  | -2.85073590 |
| C  | 4.28718996  | 7.02130222  | -1.71618903 |
| H  | 3.44343209  | 7.69694805  | -1.50179303 |
| H  | 4.97429609  | 7.06803513  | -0.85592002 |
| H  | 4.82115984  | 7.42332697  | -2.59058690 |
| C  | 0.13743900  | -0.00015700 | -0.08941600 |
| C  | -1.09258294 | -0.22776200 | -0.02380600 |
| Cl | 4.34363890  | 0.75368297  | 0.09998800  |
| C  | -2.48462796 | -0.30687901 | -0.04314700 |
| C  | -3.25201797 | -1.39157796 | 0.56723398  |
| C  | -3.18254209 | 0.72403502  | -0.70057303 |
| C  | -4.65829897 | -1.39034200 | 0.44988200  |
| C  | -2.59945607 | -2.46082497 | 1.32544005  |
| C  | -4.56426191 | 0.73108101  | -0.81077898 |
| H  | -2.62297392 | 1.54101503  | -1.15716600 |
| C  | -5.43952179 | -2.42932701 | 1.01627803  |
| C  | -5.32897282 | -0.33101201 | -0.24623699 |
| O  | -1.38988400 | -2.52214909 | 1.51170397  |
| N  | -3.41381097 | -3.45812988 | 1.86122203  |
| C  | -5.23346710 | 1.82671595  | -1.50894797 |
| C  | -4.80042410 | -3.52447200 | 1.74988401  |
| C  | -6.83947706 | -2.42299104 | 0.88623399  |
| C  | -6.72265720 | -0.34324700 | -0.35827801 |
| C  | -2.73263788 | -4.50258303 | 2.60641098  |
| O  | -4.64055014 | 2.77545595  | -2.00746703 |
| N  | -6.62390423 | 1.75638604  | -1.59257698 |
| O  | -5.43412685 | -4.44403791 | 2.24771690  |
| C  | -7.47359324 | -1.39932501 | 0.21024300  |
| H  | -7.40210009 | -3.24316311 | 1.33445597  |
| C  | -7.42103100 | 0.73806602  | -1.06324995 |
| H  | -2.05876303 | -5.06789684 | 1.94701803  |
| H  | -2.13121700 | -4.06017208 | 3.41166091  |
| H  | -3.49492598 | -5.16900587 | 3.01985693  |
| C  | -7.27552319 | 2.84977603  | -2.29124594 |
| H  | -8.55919933 | -1.37702203 | 0.10102900  |

|   |             |            |             |
|---|-------------|------------|-------------|
| O | -8.63705730 | 0.76060802 | -1.18791401 |
| H | -6.91419983 | 2.90703797 | -3.32746792 |
| H | -8.35330868 | 2.66439390 | -2.27592993 |
| H | -7.04640913 | 3.80481195 | -1.79831398 |

Frequencies

| Mode | IR frequency | IR intensity |
|------|--------------|--------------|
| 1    | 5.45370000   | 0.19910000   |
| 2    | 9.45600000   | 0.05920000   |
| 3    | 10.29900000  | 0.12990000   |
| 4    | 15.49910000  | 0.34360000   |
| 5    | 18.08050000  | 0.27500000   |
| 6    | 24.56420000  | 0.28100000   |
| 7    | 34.96010000  | 0.60680000   |
| 8    | 38.63270000  | 0.03210000   |
| 9    | 39.32740000  | 0.16710000   |
| 10   | 39.92070000  | 0.01030000   |
| 11   | 40.72690000  | 0.03420000   |
| 12   | 43.15380000  | 0.85170000   |
| 13   | 50.51900000  | 0.05630000   |
| 14   | 52.92330000  | 0.05950000   |
| 15   | 55.65670000  | 0.10000000   |
| 16   | 60.01040000  | 0.11260000   |
| 17   | 61.22670000  | 0.55240000   |
| 18   | 65.37330000  | 0.32330000   |
| 19   | 66.37030000  | 0.38210000   |
| 20   | 69.18800000  | 0.24970000   |
| 21   | 72.68770000  | 0.22930000   |
| 22   | 76.01970000  | 0.22370000   |
| 23   | 78.58040000  | 0.48980000   |
| 24   | 79.45880000  | 0.31810000   |
| 25   | 89.22410000  | 3.32900000   |
| 26   | 91.28580000  | 0.17340000   |
| 27   | 92.70200000  | 4.95980000   |
| 28   | 97.87240000  | 3.39180000   |
| 29   | 103.25490000 | 2.10310000   |
| 30   | 111.52970000 | 3.82130000   |
| 31   | 112.87410000 | 1.39310000   |
| 32   | 116.20480000 | 3.13730000   |
| 33   | 120.50110000 | 1.23040000   |
| 34   | 130.11800000 | 0.15160000   |
| 35   | 134.50780000 | 2.22700000   |
| 36   | 135.38550000 | 3.15860000   |
| 37   | 138.83330000 | 5.48210000   |
| 38   | 139.23460000 | 17.61050000  |
| 39   | 142.53220000 | 2.96840000   |
| 40   | 148.65830000 | 1.66820000   |
| 41   | 153.65160000 | 1.90280000   |
| 42   | 159.83400000 | 1.86010000   |
| 43   | 162.84230000 | 1.69250000   |
| 44   | 164.98670000 | 4.29990000   |

|    |              |              |
|----|--------------|--------------|
| 45 | 167.76150000 | 1.35890000   |
| 46 | 171.53570000 | 4.19970000   |
| 47 | 176.04520000 | 2.84510000   |
| 48 | 177.00570000 | 3.28700000   |
| 49 | 186.31720000 | 6.11700000   |
| 50 | 196.78750000 | 4.71620000   |
| 51 | 210.92830000 | 1.14440000   |
| 52 | 218.13730000 | 0.00300000   |
| 53 | 219.16820000 | 2.19140000   |
| 54 | 223.30110000 | 1.97170000   |
| 55 | 223.93570000 | 0.99610000   |
| 56 | 232.89250000 | 0.67550000   |
| 57 | 233.95070000 | 0.78040000   |
| 58 | 246.05790000 | 3.35590000   |
| 59 | 256.69830000 | 0.11150000   |
| 60 | 257.05040000 | 0.14570000   |
| 61 | 257.44760000 | 0.02500000   |
| 62 | 257.98860000 | 0.16070000   |
| 63 | 258.28780000 | 0.14890000   |
| 64 | 258.44980000 | 0.17430000   |
| 65 | 281.57500000 | 1.48570000   |
| 66 | 296.98680000 | 35.57960000  |
| 67 | 301.34750000 | 3.58270000   |
| 68 | 307.01980000 | 206.36670000 |
| 69 | 311.49770000 | 7.60760000   |
| 70 | 335.05580000 | 32.06750000  |
| 71 | 337.03700000 | 0.18650000   |
| 72 | 338.66720000 | 11.62120000  |
| 73 | 342.32310000 | 12.39210000  |
| 74 | 343.03580000 | 22.70510000  |
| 75 | 353.58060000 | 24.93290000  |
| 76 | 371.61890000 | 6.86810000   |
| 77 | 377.22270000 | 4.53930000   |
| 78 | 382.56610000 | 37.01880000  |
| 79 | 386.75820000 | 38.28020000  |
| 80 | 403.76410000 | 0.09290000   |
| 81 | 408.86730000 | 0.47830000   |
| 82 | 409.84990000 | 58.38020000  |
| 83 | 410.91890000 | 49.02560000  |
| 84 | 413.31660000 | 1.85840000   |
| 85 | 421.08980000 | 14.91390000  |
| 86 | 422.51040000 | 55.46910000  |
| 87 | 433.63720000 | 1.41770000   |
| 88 | 464.90190000 | 92.42170000  |
| 89 | 480.84510000 | 10.37410000  |
| 90 | 495.67480000 | 33.70140000  |
| 91 | 508.81420000 | 84.49110000  |
| 92 | 520.81390000 | 218.08640000 |
| 93 | 523.76930000 | 61.62090000  |
| 94 | 557.85280000 | 2.23810000   |
| 95 | 564.58570000 | 4.43380000   |

|     |               |              |
|-----|---------------|--------------|
| 96  | 585.48550000  | 49.15810000  |
| 97  | 591.02330000  | 11.57300000  |
| 98  | 609.95120000  | 14.08030000  |
| 99  | 629.77500000  | 59.86210000  |
| 100 | 655.01990000  | 5.96330000   |
| 101 | 690.86950000  | 29.04560000  |
| 102 | 692.25170000  | 14.56440000  |
| 103 | 703.20380000  | 4.43410000   |
| 104 | 706.11740000  | 10.50830000  |
| 105 | 722.52690000  | 24.40400000  |
| 106 | 723.70250000  | 31.30500000  |
| 107 | 724.02200000  | 6.83370000   |
| 108 | 728.74320000  | 18.31300000  |
| 109 | 741.49650000  | 4.72270000   |
| 110 | 743.09300000  | 6.30680000   |
| 111 | 755.97750000  | 0.36160000   |
| 112 | 755.99870000  | 2.34760000   |
| 113 | 756.84880000  | 20.81310000  |
| 114 | 762.57830000  | 5.59820000   |
| 115 | 763.30020000  | 0.91980000   |
| 116 | 763.90670000  | 4.36050000   |
| 117 | 765.01200000  | 4.03990000   |
| 118 | 767.98240000  | 0.13330000   |
| 119 | 778.20550000  | 2.39930000   |
| 120 | 786.61970000  | 68.68910000  |
| 121 | 790.28840000  | 1.56750000   |
| 122 | 793.55140000  | 6.70110000   |
| 123 | 794.25580000  | 3.14220000   |
| 124 | 794.85170000  | 56.90600000  |
| 125 | 798.03750000  | 53.36640000  |
| 126 | 849.95930000  | 3.65330000   |
| 127 | 863.68670000  | 72.49090000  |
| 128 | 872.35080000  | 6.22330000   |
| 129 | 884.93500000  | 5.03860000   |
| 130 | 885.08490000  | 3.41030000   |
| 131 | 904.48810000  | 1.78320000   |
| 132 | 905.00850000  | 19.10470000  |
| 133 | 905.18670000  | 14.61790000  |
| 134 | 906.30790000  | 20.69770000  |
| 135 | 915.31830000  | 10.97790000  |
| 136 | 915.75760000  | 19.05180000  |
| 137 | 915.80500000  | 9.64630000   |
| 138 | 916.10240000  | 8.22510000   |
| 139 | 916.50860000  | 5.35760000   |
| 140 | 917.29370000  | 12.03470000  |
| 141 | 922.01810000  | 118.43140000 |
| 142 | 948.47750000  | 14.26980000  |
| 143 | 968.76480000  | 34.21920000  |
| 144 | 1015.10930000 | 0.10270000   |
| 145 | 1029.20730000 | 39.80150000  |
| 146 | 1037.79010000 | 3.68990000   |

|     |               |               |
|-----|---------------|---------------|
| 147 | 1038.63050000 | 5.00880000    |
| 148 | 1044.57260000 | 58.37990000   |
| 149 | 1051.71640000 | 0.96630000    |
| 150 | 1052.07250000 | 7.74920000    |
| 151 | 1052.46580000 | 6.25720000    |
| 152 | 1053.16260000 | 7.20990000    |
| 153 | 1053.74450000 | 4.52030000    |
| 154 | 1054.32900000 | 1.43090000    |
| 155 | 1062.18370000 | 67.26280000   |
| 156 | 1075.74830000 | 4.34310000    |
| 157 | 1077.02560000 | 3.10360000    |
| 158 | 1078.56040000 | 5.89060000    |
| 159 | 1080.43910000 | 2.59930000    |
| 160 | 1087.81010000 | 17.87050000   |
| 161 | 1089.33040000 | 0.60720000    |
| 162 | 1089.73390000 | 1.20050000    |
| 163 | 1089.96570000 | 0.50070000    |
| 164 | 1090.19100000 | 1.31960000    |
| 165 | 1092.45900000 | 7.67000000    |
| 166 | 1092.84220000 | 0.73030000    |
| 167 | 1116.12190000 | 11.69710000   |
| 168 | 1116.63480000 | 5.75320000    |
| 169 | 1117.23930000 | 21.05310000   |
| 170 | 1117.40870000 | 47.78660000   |
| 171 | 1120.69730000 | 132.60770000  |
| 172 | 1123.41460000 | 130.89280000  |
| 173 | 1140.47800000 | 0.34350000    |
| 174 | 1141.66680000 | 0.22960000    |
| 175 | 1157.70880000 | 6.73950000    |
| 176 | 1180.34440000 | 444.82120000  |
| 177 | 1212.22450000 | 23.77780000   |
| 178 | 1213.55650000 | 0.89080000    |
| 179 | 1215.04160000 | 0.92270000    |
| 180 | 1217.04870000 | 0.58890000    |
| 181 | 1217.13000000 | 5.62620000    |
| 182 | 1217.65020000 | 1.89660000    |
| 183 | 1218.36750000 | 0.34430000    |
| 184 | 1227.07010000 | 34.94620000   |
| 185 | 1230.18020000 | 1.21730000    |
| 186 | 1230.35540000 | 1.93950000    |
| 187 | 1232.00690000 | 2.03230000    |
| 188 | 1235.20690000 | 3.00060000    |
| 189 | 1250.08660000 | 77.61770000   |
| 190 | 1251.86330000 | 77.21630000   |
| 191 | 1256.02820000 | 57.38050000   |
| 192 | 1273.15810000 | 1235.19580000 |
| 193 | 1290.87700000 | 0.92680000    |
| 194 | 1291.49860000 | 0.91960000    |
| 195 | 1294.89180000 | 2.78820000    |
| 196 | 1296.91330000 | 2.11280000    |
| 197 | 1297.78990000 | 3.85630000    |

|     |               |               |
|-----|---------------|---------------|
| 198 | 1299.71010000 | 1.96650000    |
| 199 | 1316.11700000 | 299.01770000  |
| 200 | 1317.92270000 | 3.11830000    |
| 201 | 1318.95510000 | 4.56100000    |
| 202 | 1319.35960000 | 4.79960000    |
| 203 | 1319.51590000 | 3.70490000    |
| 204 | 1319.66160000 | 0.05890000    |
| 205 | 1320.02870000 | 3.49710000    |
| 206 | 1320.78660000 | 1.42490000    |
| 207 | 1321.74140000 | 0.67370000    |
| 208 | 1322.85920000 | 15.98100000   |
| 209 | 1323.37580000 | 33.31870000   |
| 210 | 1326.56580000 | 252.39580000  |
| 211 | 1327.89200000 | 187.15040000  |
| 212 | 1330.60150000 | 13.40310000   |
| 213 | 1366.52030000 | 302.16500000  |
| 214 | 1377.45270000 | 1383.53590000 |
| 215 | 1381.19490000 | 0.23900000    |
| 216 | 1381.31090000 | 0.11580000    |
| 217 | 1381.81610000 | 0.38880000    |
| 218 | 1381.97280000 | 0.18840000    |
| 219 | 1384.53170000 | 0.25710000    |
| 220 | 1384.79340000 | 1.46250000    |
| 221 | 1398.68250000 | 0.15840000    |
| 222 | 1398.72700000 | 0.11480000    |
| 223 | 1398.81930000 | 1.73640000    |
| 224 | 1399.28520000 | 0.79460000    |
| 225 | 1400.93130000 | 295.87320000  |
| 226 | 1401.45200000 | 27.55520000   |
| 227 | 1401.84220000 | 21.47290000   |
| 228 | 1403.26780000 | 292.44400000  |
| 229 | 1417.39350000 | 68.38950000   |
| 230 | 1420.68540000 | 46.56340000   |
| 231 | 1420.99510000 | 190.02190000  |
| 232 | 1421.60590000 | 384.30920000  |
| 233 | 1423.06160000 | 13.19170000   |
| 234 | 1425.65080000 | 24.27840000   |
| 235 | 1431.89040000 | 16.17160000   |
| 236 | 1447.65210000 | 5.13170000    |
| 237 | 1447.76470000 | 7.89090000    |
| 238 | 1449.39950000 | 1.64900000    |
| 239 | 1449.57390000 | 0.98570000    |
| 240 | 1449.78630000 | 10.94250000   |
| 241 | 1451.02290000 | 2.15990000    |
| 242 | 1452.14860000 | 226.77360000  |
| 243 | 1454.04330000 | 21.99070000   |
| 244 | 1456.04580000 | 14.84840000   |
| 245 | 1458.19200000 | 10.32830000   |
| 246 | 1458.67520000 | 8.21510000    |
| 247 | 1458.69990000 | 12.67180000   |
| 248 | 1458.71820000 | 7.07390000    |

|     |               |               |
|-----|---------------|---------------|
| 249 | 1458.85020000 | 11.93030000   |
| 250 | 1458.96360000 | 9.51980000    |
| 251 | 1459.27290000 | 31.64900000   |
| 252 | 1460.21980000 | 1.16980000    |
| 253 | 1460.38330000 | 0.26030000    |
| 254 | 1465.14890000 | 0.16300000    |
| 255 | 1465.31900000 | 0.09950000    |
| 256 | 1465.51030000 | 0.03600000    |
| 257 | 1465.53330000 | 0.13990000    |
| 258 | 1466.16050000 | 4.03260000    |
| 259 | 1473.37990000 | 3.93530000    |
| 260 | 1473.70550000 | 7.73760000    |
| 261 | 1476.78530000 | 15.38460000   |
| 262 | 1476.88470000 | 15.71170000   |
| 263 | 1477.31380000 | 14.98470000   |
| 264 | 1477.59950000 | 18.23320000   |
| 265 | 1482.87980000 | 24.59150000   |
| 266 | 1493.65890000 | 62.32340000   |
| 267 | 1513.68250000 | 278.33230000  |
| 268 | 1542.03250000 | 366.45020000  |
| 269 | 1571.45750000 | 2242.23630000 |
| 270 | 1601.55270000 | 1242.10480000 |
| 271 | 1657.20330000 | 378.05670000  |
| 272 | 1714.55720000 | 1169.46540000 |
| 273 | 1734.58470000 | 1507.90290000 |
| 274 | 1760.78530000 | 1137.87450000 |
| 275 | 1778.39910000 | 979.83170000  |
| 276 | 2104.27420000 | 75.47070000   |
| 277 | 3045.46390000 | 33.61890000   |
| 278 | 3045.53820000 | 43.06610000   |
| 279 | 3045.65610000 | 26.42200000   |
| 280 | 3045.71020000 | 33.11180000   |
| 281 | 3046.19550000 | 25.91320000   |
| 282 | 3046.80840000 | 34.82690000   |
| 283 | 3048.06890000 | 24.42890000   |
| 284 | 3048.73470000 | 13.73880000   |
| 285 | 3048.80440000 | 45.69890000   |
| 286 | 3048.91580000 | 12.38060000   |
| 287 | 3048.95810000 | 47.77060000   |
| 288 | 3049.00290000 | 19.16440000   |
| 289 | 3055.25750000 | 45.76670000   |
| 290 | 3059.22970000 | 26.90510000   |
| 291 | 3059.55050000 | 14.25090000   |
| 292 | 3060.57080000 | 23.96350000   |
| 293 | 3061.43080000 | 50.92780000   |
| 294 | 3061.51100000 | 12.42040000   |
| 295 | 3063.72550000 | 47.03930000   |
| 296 | 3066.79230000 | 38.61520000   |
| 297 | 3067.21100000 | 26.52210000   |
| 298 | 3067.72770000 | 28.83370000   |
| 299 | 3068.92270000 | 26.69550000   |



|     |               |             |
|-----|---------------|-------------|
| 300 | 3070.59490000 | 26.48760000 |
| 301 | 3081.82370000 | 48.81360000 |
| 302 | 3083.12870000 | 27.48930000 |
| 303 | 3090.67930000 | 11.87390000 |
| 304 | 3090.73210000 | 9.35850000  |
| 305 | 3090.77800000 | 12.65390000 |
| 306 | 3090.92410000 | 9.59360000  |
| 307 | 3092.11130000 | 5.09680000  |
| 308 | 3094.61230000 | 4.23700000  |
| 309 | 3115.64530000 | 55.14940000 |
| 310 | 3116.18400000 | 7.20420000  |
| 311 | 3117.47520000 | 10.10840000 |
| 312 | 3118.28800000 | 16.69440000 |
| 313 | 3118.47130000 | 14.39610000 |
| 314 | 3118.71580000 | 16.48920000 |
| 315 | 3130.73020000 | 7.15250000  |
| 316 | 3131.57440000 | 14.59920000 |
| 317 | 3132.98460000 | 11.43620000 |
| 318 | 3134.66380000 | 4.00300000  |
| 319 | 3136.14160000 | 3.91150000  |
| 320 | 3136.79920000 | 1.51310000  |
| 321 | 3138.01630000 | 56.17760000 |
| 322 | 3138.59060000 | 59.79970000 |
| 323 | 3139.07640000 | 49.83250000 |
| 324 | 3139.16040000 | 66.12620000 |
| 325 | 3139.25530000 | 56.96400000 |
| 326 | 3139.41620000 | 66.35600000 |
| 327 | 3147.02150000 | 30.46600000 |
| 328 | 3147.99360000 | 36.88610000 |
| 329 | 3148.01080000 | 31.54070000 |
| 330 | 3148.06460000 | 27.38040000 |
| 331 | 3148.14480000 | 34.06680000 |
| 332 | 3148.36480000 | 30.67560000 |
| 333 | 3170.13720000 | 11.23630000 |
| 334 | 3173.27260000 | 10.40830000 |
| 335 | 3230.76820000 | 2.69350000  |
| 336 | 3231.73670000 | 2.21750000  |
| 337 | 3235.46680000 | 4.94300000  |
| 338 | 3243.69790000 | 3.50230000  |
| 339 | 3247.92750000 | 6.53390000  |

### 3: Ph-CC-Pt-CC-NDI in CH<sub>2</sub>Cl<sub>2</sub>, SINGLET

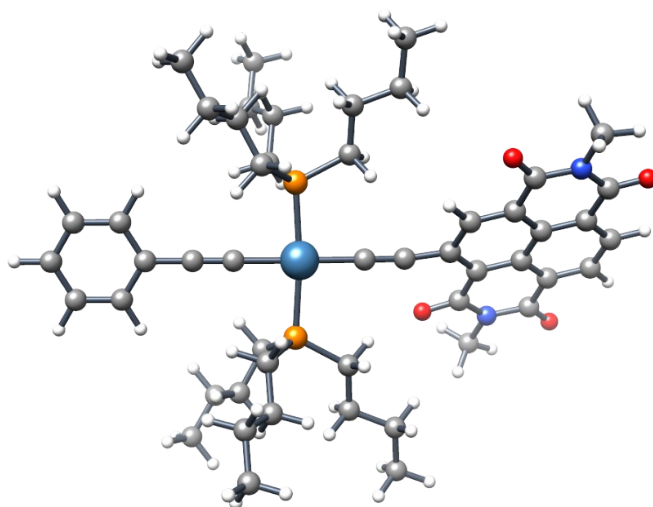

Optimised singlet ground state geometry of Ph-CC-Pt-CC-NDI.

Route : #p opt freq PBE1PBE/genecp  
: scrf=(cpcm,solvent=dichloromethane) geom=connectivity  
: int=(acc2e=13,ultrafine)  
SMILES : CCCC[P](CCCC)(CCCC)[Pt]  
: (C#Cc1ccccc1)(C#Cc2cc3c4c(ccc5c4c2C(=O)N(C5=O)C)  
: C(=O)N(C3=O)C)[P](CCCC)(CCCC)CCCC  
Formula : C<sub>50</sub>H<sub>68</sub>N<sub>2</sub>O<sub>4</sub>P<sub>2</sub>Pt  
Charge : 0  
Multiplicity : 1  
Dipole : 12.5326 Debye  
Energy : -3154.10664104 a.u.  
Gibbs Energy : -3153.13992300 a.u.  
Number of imaginary frequencies : 0

Cartesian Co-ordinates (XYZ format)

127

|    |            |             |             |
|----|------------|-------------|-------------|
| Pt | 1.44295299 | 0.07700500  | -0.08976700 |
| C  | 3.43394804 | 0.31483901  | -0.03172800 |
| P  | 1.27538502 | 2.39403701  | 0.25383800  |
| P  | 1.85283196 | -2.20793009 | -0.42944100 |
| C  | 4.65732002 | 0.45934501  | 0.01820400  |
| C  | 6.07598877 | 0.62532300  | 0.07376200  |
| C  | 6.93309116 | -0.49048200 | 0.16729701  |
| C  | 6.65789223 | 1.90920401  | 0.03634800  |
| C  | 8.31428719 | -0.32573599 | 0.22070500  |

|   |             |             |             |
|---|-------------|-------------|-------------|
| H | 6.49825716  | -1.49245405 | 0.19768500  |
| C | 8.03989124  | 2.06709099  | 0.08986900  |
| H | 6.00784492  | 2.78452992  | -0.03585100 |
| C | 8.87519455  | 0.95221299  | 0.18236400  |
| H | 8.96026230  | -1.20453894 | 0.29322800  |
| H | 8.47000122  | 3.07153201  | 0.05922900  |
| C | 2.26625395  | 3.30123806  | -1.00735402 |
| H | 3.10158205  | 2.62142992  | -1.23797405 |
| H | 1.63295496  | 3.32903695  | -1.91163898 |
| C | -0.43975499 | 3.05615211  | 0.18134899  |
| H | -0.92667103 | 2.71877289  | 1.11279297  |
| H | -0.92347300 | 2.47575307  | -0.62016302 |
| C | 1.95827103  | 2.76474595  | 1.92487597  |
| H | 1.60934305  | 1.93031597  | 2.55633497  |
| H | 3.04769897  | 2.61992407  | 1.82472801  |
| C | 0.34943399  | -3.25355911 | -0.57702303 |
| H | -0.05676000 | -3.04216194 | -1.58205295 |
| H | -0.37721401 | -2.81698799 | 0.12724800  |
| C | 2.81830406  | -2.38145089 | -1.99021494 |
| H | 2.37021089  | -1.64192903 | -2.67523789 |
| H | 3.82072902  | -1.98729897 | -1.75105095 |
| C | 2.86156607  | -2.86941791 | 0.96409303  |
| H | 3.47886395  | -2.01471400 | 1.28292799  |
| H | 2.14384389  | -3.05338097 | 1.78290606  |
| C | 2.89968395  | -3.73615694 | -2.68540812 |
| H | 1.88506496  | -4.08247805 | -2.94610596 |
| H | 3.32068801  | -4.49774408 | -2.00946307 |
| C | 3.74264693  | -3.67733788 | -3.95607305 |
| H | 4.75918484  | -3.33121610 | -3.69856811 |
| H | 3.32575798  | -2.90844297 | -4.63029003 |
| C | 3.82290697  | -5.01008320 | -4.68410683 |
| H | 4.43762112  | -4.93602991 | -5.59412003 |
| H | 4.26785517  | -5.78936815 | -4.04437304 |
| H | 2.82309008  | -5.36233521 | -4.98546410 |
| C | 0.46252799  | -4.75619984 | -0.33787000 |
| H | 1.19207001  | -5.21551704 | -1.02453995 |
| H | 0.84207797  | -4.94014502 | 0.68191302  |
| C | -0.88243997 | -5.46022606 | -0.49310499 |
| H | -1.26956904 | -5.27853394 | -1.51137996 |
| H | -1.60881603 | -4.99254704 | 0.19378200  |
| C | -0.80978101 | -6.95650196 | -0.23146400 |
| H | -1.79362297 | -7.43554211 | -0.35117701 |
| H | -0.11213000 | -7.45174789 | -0.92630303 |
| H | -0.45972699 | -7.16721582 | 0.79217201  |
| C | 3.75517201  | -4.08489418 | 0.73663402  |
| H | 3.16584396  | -4.94873095 | 0.38938701  |
| H | 4.48072290  | -3.86337399 | -0.06480400 |
| C | 4.51947117  | -4.47668982 | 1.99785101  |
| H | 5.10759783  | -3.60932803 | 2.34640503  |
| H | 3.79741001  | -4.69403982 | 2.80465794  |
| C | 5.43751383  | -5.67199707 | 1.79486597  |

|   |             |             |             |
|---|-------------|-------------|-------------|
| H | 6.19269323  | -5.46915007 | 1.01826096  |
| H | 5.97381592  | -5.93033314 | 2.72068095  |
| H | 4.87085676  | -6.56280422 | 1.47883296  |
| C | 1.63056302  | 4.09026098  | 2.60371304  |
| H | 0.53807998  | 4.18560791  | 2.72489095  |
| H | 1.94639003  | 4.93907309  | 1.97621405  |
| C | 2.29138708  | 4.21011496  | 3.97391391  |
| H | 1.98179996  | 3.35453200  | 4.59972000  |
| H | 3.38526607  | 4.11545706  | 3.85600209  |
| C | 1.96243298  | 5.51308918  | 4.68573523  |
| H | 2.29241204  | 6.38476992  | 4.09769392  |
| H | 0.87753099  | 5.61714888  | 4.84899712  |
| H | 2.45363903  | 5.57023716  | 5.66904116  |
| C | -0.66665798 | 4.54622221  | -0.05100000 |
| H | -0.16766900 | 5.14711285  | 0.72635001  |
| H | -0.21184801 | 4.84555006  | -1.01068699 |
| C | -2.15090394 | 4.90180683  | -0.07731700 |
| H | -2.65835404 | 4.29801178  | -0.85030103 |
| H | -2.60879207 | 4.60517216  | 0.88292801  |
| C | -2.40708089 | 6.37908316  | -0.33230501 |
| H | -3.48431301 | 6.60471392  | -0.34431401 |
| H | -1.94395804 | 7.00665712  | 0.44635001  |
| H | -1.99022806 | 6.69575977  | -1.30209899 |
| C | 2.81265903  | 4.68752813  | -0.67999798 |
| H | 3.46395111  | 4.62601423  | 0.20871601  |
| H | 1.99789298  | 5.38170004  | -0.41820800 |
| C | 3.61500692  | 5.27387094  | -1.83793402 |
| H | 4.42998314  | 4.57634878  | -2.10062408 |
| H | 2.96918011  | 5.33202982  | -2.73183393 |
| C | 4.19244814  | 6.64696217  | -1.53151095 |
| H | 3.39673305  | 7.37286282  | -1.29822898 |
| H | 4.87073278  | 6.61121416  | -0.66363698 |
| H | 4.76438904  | 7.04325914  | -2.38432789 |
| C | -0.52675301 | -0.15387399 | -0.09782800 |
| C | -1.75374305 | -0.30068299 | -0.04617800 |
| C | -3.16634798 | -0.26947001 | -0.07635300 |
| C | -4.03215313 | -1.15006304 | 0.60494000  |
| C | -3.75395107 | 0.77284098  | -0.86181003 |
| C | -5.43906689 | -0.98018003 | 0.50889403  |
| C | -3.50734401 | -2.25861597 | 1.42826998  |
| C | -5.11131716 | 0.94411200  | -0.95722502 |
| H | -3.09877110 | 1.45888805  | -1.40001297 |
| C | -6.33231401 | -1.84176803 | 1.18850899  |
| C | -5.98813295 | 0.06729100  | -0.27426201 |
| O | -2.32237291 | -2.50136709 | 1.55817902  |
| N | -4.43526888 | -3.07182002 | 2.08896589  |
| C | -5.65711880 | 2.05643511  | -1.77253902 |
| C | -5.81699896 | -2.94709110 | 2.02564406  |
| C | -7.70483923 | -1.66413796 | 1.08412504  |
| C | -7.38335800 | 0.23249300  | -0.36936501 |
| C | -3.87753391 | -4.14725399 | 2.89255810  |

|   |             |             |             |
|---|-------------|-------------|-------------|
| O | -4.94884014 | 2.84886503  | -2.36183691 |
| N | -7.04168177 | 2.16798401  | -1.83946502 |
| O | -6.55545521 | -3.70588589 | 2.62524390  |
| C | -8.23616219 | -0.62907600 | 0.30502999  |
| H | -8.35805798 | -2.35126090 | 1.62484598  |
| C | -7.95177984 | 1.32936895  | -1.19270504 |
| H | -3.36023998 | -4.87538099 | 2.25148201  |
| H | -3.15095401 | -3.74209499 | 3.60852504  |
| H | -4.70228195 | -4.63612413 | 3.41867900  |
| C | -7.55746508 | 3.26164794  | -2.64740801 |
| H | -9.31409836 | -0.48428699 | 0.21751601  |
| O | -9.14941788 | 1.49673796  | -1.30143404 |
| H | -7.20952797 | 3.16080403  | -3.68436909 |
| H | -8.64966488 | 3.22352695  | -2.61035991 |
| H | -7.19830608 | 4.22267389  | -2.25468206 |
| H | 9.95973015  | 1.07887304  | 0.22444300  |

### Frequencies

| Mode | IR frequency | IR intensity |
|------|--------------|--------------|
| 1    | 7.39180000   | 0.00900000   |
| 2    | 8.72290000   | 0.09350000   |
| 3    | 10.30850000  | 0.08480000   |
| 4    | 12.10600000  | 0.04860000   |
| 5    | 13.03070000  | 0.01090000   |
| 6    | 16.13530000  | 0.07110000   |
| 7    | 18.80660000  | 0.06760000   |
| 8    | 20.20490000  | 0.34660000   |
| 9    | 25.39480000  | 0.67010000   |
| 10   | 34.46910000  | 0.17260000   |
| 11   | 39.15800000  | 0.02090000   |
| 12   | 39.46160000  | 0.00900000   |
| 13   | 40.19130000  | 0.02570000   |
| 14   | 40.84020000  | 0.14470000   |
| 15   | 46.11170000  | 0.23550000   |
| 16   | 50.85550000  | 0.05510000   |
| 17   | 53.61730000  | 0.14580000   |
| 18   | 55.51250000  | 0.10070000   |
| 19   | 61.49750000  | 0.14830000   |
| 20   | 63.76990000  | 0.16760000   |
| 21   | 67.07480000  | 0.35460000   |
| 22   | 68.74240000  | 0.21240000   |
| 23   | 70.70910000  | 0.05660000   |
| 24   | 72.51990000  | 0.77950000   |
| 25   | 78.35220000  | 0.24050000   |
| 26   | 78.66630000  | 0.32870000   |
| 27   | 81.88240000  | 0.04040000   |
| 28   | 85.61150000  | 3.90070000   |
| 29   | 88.60960000  | 1.71730000   |
| 30   | 89.94120000  | 4.01310000   |
| 31   | 96.91800000  | 2.42360000   |
| 32   | 102.47540000 | 8.33360000   |

|    |              |             |
|----|--------------|-------------|
| 33 | 106.96800000 | 1.62460000  |
| 34 | 109.25940000 | 2.46010000  |
| 35 | 114.21950000 | 0.15580000  |
| 36 | 115.54850000 | 0.21610000  |
| 37 | 119.51930000 | 3.81170000  |
| 38 | 122.72510000 | 4.19810000  |
| 39 | 136.21870000 | 0.12860000  |
| 40 | 137.50290000 | 12.41340000 |
| 41 | 139.81880000 | 1.90330000  |
| 42 | 143.02240000 | 0.31550000  |
| 43 | 147.93830000 | 1.46310000  |
| 44 | 151.53010000 | 1.69080000  |
| 45 | 161.42400000 | 1.13460000  |
| 46 | 163.45850000 | 0.47760000  |
| 47 | 165.48170000 | 0.73920000  |
| 48 | 169.09470000 | 0.56590000  |
| 49 | 170.74830000 | 0.84600000  |
| 50 | 172.44280000 | 0.45950000  |
| 51 | 176.70680000 | 0.48160000  |
| 52 | 178.53150000 | 1.07370000  |
| 53 | 197.82760000 | 0.29670000  |
| 54 | 203.29360000 | 2.83600000  |
| 55 | 217.72430000 | 1.31110000  |
| 56 | 219.04150000 | 0.30140000  |
| 57 | 221.39960000 | 2.95350000  |
| 58 | 223.73520000 | 2.70450000  |
| 59 | 225.98640000 | 3.06150000  |
| 60 | 227.17260000 | 1.12720000  |
| 61 | 233.73140000 | 0.17540000  |
| 62 | 234.81250000 | 0.12120000  |
| 63 | 257.16320000 | 0.06660000  |
| 64 | 257.66050000 | 0.04750000  |
| 65 | 258.18890000 | 0.04560000  |
| 66 | 258.34370000 | 0.05910000  |
| 67 | 258.50110000 | 0.17380000  |
| 68 | 259.33400000 | 0.15450000  |
| 69 | 272.63530000 | 3.11240000  |
| 70 | 274.62570000 | 2.01740000  |
| 71 | 298.51310000 | 1.83360000  |
| 72 | 300.13750000 | 1.76810000  |
| 73 | 323.28930000 | 0.23960000  |
| 74 | 330.12450000 | 3.61850000  |
| 75 | 337.52560000 | 0.63110000  |
| 76 | 339.13000000 | 0.45990000  |
| 77 | 342.15840000 | 22.93430000 |
| 78 | 343.23110000 | 13.10430000 |
| 79 | 357.51670000 | 1.64200000  |
| 80 | 370.32080000 | 36.04430000 |
| 81 | 376.44440000 | 22.90560000 |
| 82 | 378.55030000 | 12.63610000 |
| 83 | 384.62370000 | 1.54440000  |

|     |              |             |
|-----|--------------|-------------|
| 84  | 390.65910000 | 15.23140000 |
| 85  | 404.60480000 | 0.32000000  |
| 86  | 408.13070000 | 32.00440000 |
| 87  | 410.69560000 | 10.60120000 |
| 88  | 411.87860000 | 67.37150000 |
| 89  | 414.00020000 | 16.41870000 |
| 90  | 414.78370000 | 9.58950000  |
| 91  | 417.64840000 | 0.00590000  |
| 92  | 421.25370000 | 2.81300000  |
| 93  | 443.43070000 | 5.02550000  |
| 94  | 453.14300000 | 15.62290000 |
| 95  | 462.26840000 | 0.07380000  |
| 96  | 484.75790000 | 7.31750000  |
| 97  | 493.16360000 | 21.06700000 |
| 98  | 505.72240000 | 99.91000000 |
| 99  | 521.32070000 | 24.07380000 |
| 100 | 525.74320000 | 11.01230000 |
| 101 | 542.83700000 | 23.92820000 |
| 102 | 550.30830000 | 8.91260000  |
| 103 | 568.00410000 | 1.10130000  |
| 104 | 570.13810000 | 8.80660000  |
| 105 | 579.11150000 | 3.11550000  |
| 106 | 588.11880000 | 4.20970000  |
| 107 | 597.90010000 | 16.38060000 |
| 108 | 613.11000000 | 1.25020000  |
| 109 | 632.49620000 | 0.04950000  |
| 110 | 635.34690000 | 1.17310000  |
| 111 | 686.77150000 | 1.16810000  |
| 112 | 692.16180000 | 21.33540000 |
| 113 | 693.34400000 | 6.04030000  |
| 114 | 701.76720000 | 3.32960000  |
| 115 | 704.00700000 | 3.45300000  |
| 116 | 717.80150000 | 48.78210000 |
| 117 | 721.27100000 | 21.01350000 |
| 118 | 721.94660000 | 28.01830000 |
| 119 | 722.93870000 | 16.42300000 |
| 120 | 726.77990000 | 18.80990000 |
| 121 | 742.28110000 | 8.19050000  |
| 122 | 750.22050000 | 0.01230000  |
| 123 | 756.41660000 | 0.20230000  |
| 124 | 756.59870000 | 0.23180000  |
| 125 | 761.97120000 | 6.36510000  |
| 126 | 762.58040000 | 3.88710000  |
| 127 | 763.13790000 | 5.66350000  |
| 128 | 764.39810000 | 7.08610000  |
| 129 | 766.29500000 | 15.17260000 |
| 130 | 770.40470000 | 22.40770000 |
| 131 | 787.09190000 | 5.94350000  |
| 132 | 787.37920000 | 3.37660000  |
| 133 | 789.97090000 | 13.19530000 |
| 134 | 791.36170000 | 22.61620000 |

|     |               |              |
|-----|---------------|--------------|
| 135 | 792.04240000  | 67.62140000  |
| 136 | 794.19700000  | 81.21420000  |
| 137 | 794.35250000  | 32.79000000  |
| 138 | 814.62600000  | 42.89820000  |
| 139 | 818.31420000  | 7.51920000   |
| 140 | 859.26950000  | 0.02570000   |
| 141 | 864.74360000  | 0.00400000   |
| 142 | 869.12800000  | 4.44190000   |
| 143 | 884.64910000  | 4.08870000   |
| 144 | 884.84710000  | 1.45240000   |
| 145 | 904.22500000  | 8.33310000   |
| 146 | 904.64670000  | 7.73570000   |
| 147 | 904.96040000  | 29.82770000  |
| 148 | 905.79240000  | 28.65930000  |
| 149 | 906.21440000  | 10.68010000  |
| 150 | 914.78000000  | 1.30810000   |
| 151 | 914.89820000  | 19.22340000  |
| 152 | 915.12640000  | 9.57900000   |
| 153 | 915.34150000  | 7.74240000   |
| 154 | 915.78610000  | 12.21220000  |
| 155 | 916.16860000  | 2.69150000   |
| 156 | 929.22500000  | 5.47530000   |
| 157 | 946.44410000  | 6.85460000   |
| 158 | 971.33000000  | 14.03510000  |
| 159 | 976.08070000  | 0.25140000   |
| 160 | 1007.84120000 | 0.00040000   |
| 161 | 1010.86410000 | 0.00810000   |
| 162 | 1026.89330000 | 0.01110000   |
| 163 | 1028.72200000 | 0.19870000   |
| 164 | 1030.45410000 | 96.35790000  |
| 165 | 1035.99210000 | 3.92430000   |
| 166 | 1036.17970000 | 0.66920000   |
| 167 | 1047.69440000 | 28.43400000  |
| 168 | 1050.92480000 | 5.92530000   |
| 169 | 1051.41250000 | 1.54890000   |
| 170 | 1051.59870000 | 4.42310000   |
| 171 | 1052.37010000 | 4.17200000   |
| 172 | 1053.02670000 | 9.41270000   |
| 173 | 1053.99200000 | 1.22860000   |
| 174 | 1056.42660000 | 12.80620000  |
| 175 | 1066.49870000 | 105.57200000 |
| 176 | 1074.06590000 | 5.71630000   |
| 177 | 1074.24840000 | 4.45700000   |
| 178 | 1076.42550000 | 8.46140000   |
| 179 | 1076.93620000 | 13.70350000  |
| 180 | 1088.76050000 | 0.69720000   |
| 181 | 1089.44320000 | 1.45000000   |
| 182 | 1089.65390000 | 2.45380000   |
| 183 | 1090.30870000 | 3.42440000   |
| 184 | 1092.05180000 | 5.74040000   |
| 185 | 1092.65530000 | 1.30250000   |



|     |               |              |
|-----|---------------|--------------|
| 186 | 1094.98920000 | 24.98460000  |
| 187 | 1098.78000000 | 12.61730000  |
| 188 | 1116.20360000 | 11.77290000  |
| 189 | 1116.36500000 | 5.28180000   |
| 190 | 1117.01490000 | 42.20730000  |
| 191 | 1117.10990000 | 22.90300000  |
| 192 | 1120.69700000 | 118.79130000 |
| 193 | 1123.76390000 | 5.51660000   |
| 194 | 1141.43310000 | 0.79130000   |
| 195 | 1142.21710000 | 0.19230000   |
| 196 | 1162.08720000 | 88.82560000  |
| 197 | 1162.85000000 | 0.00290000   |
| 198 | 1181.79030000 | 0.92550000   |
| 199 | 1189.60160000 | 9.49910000   |
| 200 | 1205.63430000 | 204.39570000 |
| 201 | 1213.52520000 | 2.07680000   |
| 202 | 1214.29870000 | 3.47410000   |
| 203 | 1216.46890000 | 2.01640000   |
| 204 | 1216.59650000 | 2.52360000   |
| 205 | 1217.03840000 | 1.77370000   |
| 206 | 1217.26470000 | 6.44390000   |
| 207 | 1228.47910000 | 12.71480000  |
| 208 | 1228.60870000 | 2.43490000   |
| 209 | 1229.03290000 | 22.38420000  |
| 210 | 1230.17490000 | 4.77500000   |
| 211 | 1232.57130000 | 0.52600000   |
| 212 | 1247.86520000 | 28.44580000  |
| 213 | 1249.43020000 | 11.89010000  |
| 214 | 1253.06770000 | 38.11720000  |
| 215 | 1256.89100000 | 47.75620000  |
| 216 | 1289.91160000 | 3.60200000   |
| 217 | 1290.78640000 | 2.16370000   |
| 218 | 1292.96420000 | 1.76650000   |
| 219 | 1295.49040000 | 1.61210000   |
| 220 | 1296.98030000 | 5.69120000   |
| 221 | 1297.49090000 | 9.01620000   |
| 222 | 1306.22490000 | 290.14230000 |
| 223 | 1315.46020000 | 0.11800000   |
| 224 | 1317.89300000 | 2.78630000   |
| 225 | 1318.14180000 | 2.03210000   |
| 226 | 1318.58390000 | 3.51550000   |
| 227 | 1318.72670000 | 2.65710000   |
| 228 | 1319.14570000 | 0.68930000   |
| 229 | 1319.54540000 | 0.98910000   |
| 230 | 1321.15410000 | 2.09940000   |
| 231 | 1321.27100000 | 1.29310000   |
| 232 | 1322.02390000 | 0.71870000   |
| 233 | 1322.11870000 | 5.09150000   |
| 234 | 1325.66680000 | 19.35130000  |
| 235 | 1329.13010000 | 12.14780000  |
| 236 | 1334.54750000 | 330.05100000 |

|     |               |              |
|-----|---------------|--------------|
| 237 | 1347.04300000 | 699.82610000 |
| 238 | 1370.47420000 | 119.86410000 |
| 239 | 1380.15440000 | 0.02910000   |
| 240 | 1380.82460000 | 0.14490000   |
| 241 | 1381.21000000 | 0.17840000   |
| 242 | 1381.57210000 | 0.23160000   |
| 243 | 1381.65400000 | 0.31640000   |
| 244 | 1383.87620000 | 0.63720000   |
| 245 | 1384.33290000 | 0.11240000   |
| 246 | 1388.61620000 | 366.17760000 |
| 247 | 1398.38210000 | 0.45240000   |
| 248 | 1398.45820000 | 1.32370000   |
| 249 | 1398.71130000 | 0.61240000   |
| 250 | 1398.79590000 | 2.59120000   |
| 251 | 1400.64660000 | 15.83650000  |
| 252 | 1401.21790000 | 5.06760000   |
| 253 | 1403.95630000 | 30.90410000  |
| 254 | 1414.37060000 | 78.42710000  |
| 255 | 1415.28250000 | 114.55570000 |
| 256 | 1420.86510000 | 14.26530000  |
| 257 | 1421.58900000 | 16.29890000  |
| 258 | 1423.02620000 | 14.58320000  |
| 259 | 1425.42480000 | 14.82470000  |
| 260 | 1429.33900000 | 33.32390000  |
| 261 | 1442.95740000 | 158.83860000 |
| 262 | 1447.45500000 | 3.88510000   |
| 263 | 1447.54440000 | 0.49400000   |
| 264 | 1449.12960000 | 1.57380000   |
| 265 | 1449.31810000 | 1.48110000   |
| 266 | 1450.61330000 | 1.88960000   |
| 267 | 1451.03870000 | 2.75800000   |
| 268 | 1454.42820000 | 28.74930000  |
| 269 | 1456.70490000 | 18.12800000  |
| 270 | 1458.30990000 | 8.75640000   |
| 271 | 1458.49940000 | 9.08880000   |
| 272 | 1458.59100000 | 10.29420000  |
| 273 | 1458.66860000 | 9.38960000   |
| 274 | 1458.72770000 | 9.30510000   |
| 275 | 1458.89720000 | 10.44370000  |
| 276 | 1460.19420000 | 0.65390000   |
| 277 | 1460.44020000 | 0.63020000   |
| 278 | 1461.76000000 | 22.11580000  |
| 279 | 1465.38210000 | 0.83510000   |
| 280 | 1465.42320000 | 0.80120000   |
| 281 | 1465.66140000 | 32.01050000  |
| 282 | 1465.75240000 | 0.17980000   |
| 283 | 1465.90900000 | 45.43900000  |
| 284 | 1473.48830000 | 4.87860000   |
| 285 | 1473.60340000 | 6.05170000   |
| 286 | 1476.73800000 | 142.28830000 |
| 287 | 1476.79640000 | 53.18990000  |

|     |               |               |
|-----|---------------|---------------|
| 288 | 1477.07280000 | 18.14330000   |
| 289 | 1477.72040000 | 12.14650000   |
| 290 | 1477.80790000 | 24.00320000   |
| 291 | 1478.48130000 | 4.91410000    |
| 292 | 1490.44540000 | 355.74070000  |
| 293 | 1501.84510000 | 342.18480000  |
| 294 | 1520.87850000 | 279.13410000  |
| 295 | 1526.94910000 | 68.70780000   |
| 296 | 1570.52490000 | 31.36570000   |
| 297 | 1638.52130000 | 511.12610000  |
| 298 | 1643.01530000 | 3.62860000    |
| 299 | 1677.32000000 | 102.89000000  |
| 300 | 1678.81600000 | 68.28620000   |
| 301 | 1699.52030000 | 173.93190000  |
| 302 | 1767.32670000 | 1094.22320000 |
| 303 | 1779.75770000 | 507.85070000  |
| 304 | 1809.35350000 | 659.95000000  |
| 305 | 1825.37940000 | 391.67370000  |
| 306 | 2172.06000000 | 2986.98290000 |
| 307 | 2210.39710000 | 32.43610000   |
| 308 | 3043.93460000 | 40.73310000   |
| 309 | 3043.97960000 | 25.25740000   |
| 310 | 3044.50140000 | 35.14670000   |
| 311 | 3044.78460000 | 30.02150000   |
| 312 | 3044.90850000 | 33.08180000   |
| 313 | 3045.73950000 | 34.84180000   |
| 314 | 3047.65850000 | 20.25750000   |
| 315 | 3047.69690000 | 22.27390000   |
| 316 | 3047.97440000 | 21.79570000   |
| 317 | 3048.04960000 | 27.85020000   |
| 318 | 3048.13760000 | 42.76760000   |
| 319 | 3048.31010000 | 31.37090000   |
| 320 | 3057.07420000 | 32.69410000   |
| 321 | 3057.16400000 | 24.59380000   |
| 322 | 3057.60460000 | 30.29380000   |
| 323 | 3059.67090000 | 32.57860000   |
| 324 | 3059.81960000 | 27.91370000   |
| 325 | 3061.14780000 | 36.19830000   |
| 326 | 3064.94210000 | 47.42270000   |
| 327 | 3065.18080000 | 34.05780000   |
| 328 | 3065.59580000 | 20.91360000   |
| 329 | 3067.12630000 | 32.47210000   |
| 330 | 3067.20960000 | 28.56430000   |
| 331 | 3071.36330000 | 24.54570000   |
| 332 | 3085.15140000 | 28.23590000   |
| 333 | 3087.12720000 | 28.48300000   |
| 334 | 3088.93180000 | 11.74240000   |
| 335 | 3089.09800000 | 12.36730000   |
| 336 | 3089.38500000 | 11.43090000   |
| 337 | 3089.84720000 | 11.58650000   |
| 338 | 3090.17980000 | 7.00480000    |

|     |               |             |
|-----|---------------|-------------|
| 339 | 3093.16750000 | 3.62520000  |
| 340 | 3114.65650000 | 7.00710000  |
| 341 | 3114.77270000 | 8.57800000  |
| 342 | 3115.64530000 | 41.78620000 |
| 343 | 3116.29630000 | 22.25930000 |
| 344 | 3116.72380000 | 21.81820000 |
| 345 | 3117.87580000 | 13.93600000 |
| 346 | 3130.34370000 | 16.64910000 |
| 347 | 3130.46370000 | 15.54370000 |
| 348 | 3133.66160000 | 11.71080000 |
| 349 | 3133.95000000 | 4.76190000  |
| 350 | 3134.27770000 | 3.58060000  |
| 351 | 3135.30910000 | 1.68520000  |
| 352 | 3137.12230000 | 55.64620000 |
| 353 | 3138.05940000 | 60.85980000 |
| 354 | 3138.09190000 | 56.90530000 |
| 355 | 3138.21500000 | 30.54600000 |
| 356 | 3138.22590000 | 94.13430000 |
| 357 | 3138.39570000 | 63.52870000 |
| 358 | 3145.24300000 | 34.45140000 |
| 359 | 3146.87740000 | 34.97560000 |
| 360 | 3146.98380000 | 37.77880000 |
| 361 | 3147.05440000 | 26.17600000 |
| 362 | 3147.11260000 | 36.56350000 |
| 363 | 3147.27890000 | 30.26000000 |
| 364 | 3177.68530000 | 8.65740000  |
| 365 | 3178.79420000 | 7.56980000  |
| 366 | 3201.08620000 | 7.93360000  |
| 367 | 3206.50650000 | 0.17120000  |
| 368 | 3215.56040000 | 5.52730000  |
| 369 | 3220.16870000 | 26.20350000 |
| 370 | 3228.28190000 | 19.06370000 |
| 371 | 3233.22380000 | 2.07780000  |
| 372 | 3235.60410000 | 2.60890000  |
| 373 | 3237.36600000 | 1.38810000  |
| 374 | 3245.75160000 | 0.86540000  |
| 375 | 3248.07850000 | 0.71270000  |

#### 4: Ph-CC-Pt-CC-NDI in CH<sub>2</sub>Cl<sub>2</sub>, TRIPLET

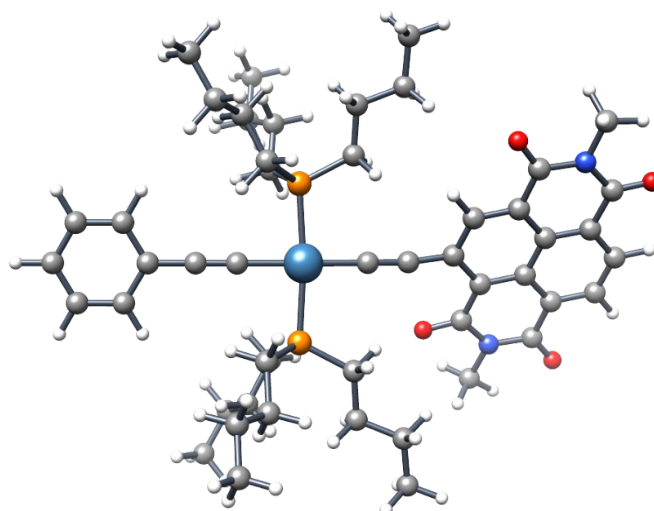

Optimised triplet ground state geometry of Ph-CC-Pt-CC-NDI.

Route : #p opt freq genecp  
: scrf=(cpcm,solvent=dichloromethane) geom=connectivity  
: int=(acc2e=13,ultrafine) pbe1pbe  
SMILES : CCCC[P](CCCC)(CCCC)[Pt]  
: (C#Cc1cccc1)(C#Cc2cc3c4c(ccc5c4c2C(=O)N(C5=O)C)  
: C(=O)N(C3=O)C)[P](CCCC)(CCCC)CCCC  
Formula : C<sub>50</sub>H<sub>68</sub>N<sub>2</sub>O<sub>4</sub>P<sub>2</sub>Pt<sub>3</sub>  
Charge : 0  
Multiplicity : 3  
Dipole : 55.9001 Debye  
Energy : -3154.04923528 a.u.  
Gibbs Energy : -3153.08501300 a.u.  
Number of imaginary frequencies : 0

Cartesian Co-ordinates (XYZ format)

127

|    |            |             |             |
|----|------------|-------------|-------------|
| Pt | 1.43814504 | 0.08752200  | -0.12758800 |
| C  | 3.41612291 | 0.26642400  | -0.03616200 |
| P  | 1.33542597 | 2.43080902  | 0.17617400  |
| P  | 1.78268898 | -2.22886109 | -0.42919999 |
| C  | 4.64448309 | 0.37836501  | 0.05322400  |
| C  | 6.05877495 | 0.50534499  | 0.14955500  |
| C  | 6.87561703 | -0.63515800 | 0.30435500  |
| C  | 6.67431116 | 1.77414203  | 0.09217300  |
| C  | 8.25692272 | -0.50694001 | 0.39812300  |

|   |             |             |             |
|---|-------------|-------------|-------------|
| H | 6.40810585  | -1.62133396 | 0.35035300  |
| C | 8.05643272  | 1.89325798  | 0.18607201  |
| H | 6.05035019  | 2.66275501  | -0.02747300 |
| C | 8.85219955  | 0.75542903  | 0.33939600  |
| H | 8.87674999  | -1.39873803 | 0.51825798  |
| H | 8.51923180  | 2.88199306  | 0.13974901  |
| C | 2.34109092  | 3.26679111  | -1.11974597 |
| H | 3.15764809  | 2.56030607  | -1.33642304 |
| H | 1.70136404  | 3.28155208  | -2.01967907 |
| C | -0.36243701 | 3.13009405  | 0.10298700  |
| H | -0.85158300 | 2.82008505  | 1.04280400  |
| H | -0.86584198 | 2.55455303  | -0.68957901 |
| C | 2.04537392  | 2.80819392  | 1.83214903  |
| H | 1.67312801  | 2.00037408  | 2.48453689  |
| H | 3.12863493  | 2.62600207  | 1.72690701  |
| C | 0.25238901  | -3.18777895 | -0.74822700 |
| H | -0.03458800 | -2.93930697 | -1.78542101 |
| H | -0.51783299 | -2.73206496 | -0.10415700 |
| C | 2.91096807  | -2.45385003 | -1.86703706 |
| H | 2.57505798  | -1.70472097 | -2.60382295 |
| H | 3.89589810  | -2.10016298 | -1.51837206 |
| C | 2.58917308  | -2.90605211 | 1.08077502  |
| H | 3.21825290  | -2.08225989 | 1.45400596  |
| H | 1.77361596  | -3.02448893 | 1.81569600  |
| C | 3.01479101  | -3.81972790 | -2.53752804 |
| H | 2.02627301  | -4.12304401 | -2.92196107 |
| H | 3.31267500  | -4.59095192 | -1.80905700 |
| C | 4.01297188  | -3.81326389 | -3.69175196 |
| H | 5.00354719  | -3.50911999 | -3.31004596 |
| H | 3.71929312  | -3.03557992 | -4.41864491 |
| C | 4.12367821  | -5.15777588 | -4.39357805 |
| H | 4.85065603  | -5.12243080 | -5.21915483 |
| H | 4.44919205  | -5.94715023 | -3.69689107 |
| H | 3.15488291  | -5.46978092 | -4.81601810 |
| C | 0.26688999  | -4.69844198 | -0.52947402 |
| H | 1.07562995  | -5.18101215 | -1.10127997 |
| H | 0.46992001  | -4.91217422 | 0.53394198  |
| C | -1.06443095 | -5.33758783 | -0.91324103 |
| H | -1.26366496 | -5.14169884 | -1.98161197 |
| H | -1.87251794 | -4.83260679 | -0.35714799 |
| C | -1.10958695 | -6.83412504 | -0.64766699 |
| H | -2.07846904 | -7.26634216 | -0.94096398 |
| H | -0.32444000 | -7.36558104 | -1.20964205 |
| H | -0.95685703 | -7.05520678 | 0.42124701  |
| C | 3.42401910  | -4.17926502 | 0.97949201  |
| H | 2.82498598  | -5.01078701 | 0.57520801  |
| H | 4.25386477  | -4.02074814 | 0.26960301  |
| C | 4.00178003  | -4.59057617 | 2.33057809  |
| H | 4.59693480  | -3.75423908 | 2.73785996  |
| H | 3.17375112  | -4.74600077 | 3.04440594  |

|   |             |             |             |
|---|-------------|-------------|-------------|
| C | 4.85915804  | -5.84440804 | 2.25801802  |
| H | 5.71533918  | -5.70530605 | 1.57826102  |
| H | 5.25998497  | -6.11553383 | 3.24653792  |
| H | 4.27933216  | -6.70473194 | 1.88653004  |
| C | 1.76768100  | 4.15971518  | 2.48204803  |
| H | 0.68050802  | 4.29256201  | 2.61355710  |
| H | 2.10300207  | 4.98251009  | 1.83053696  |
| C | 2.44938707  | 4.29021597  | 3.84093499  |
| H | 2.11948299  | 3.46104789  | 4.49131298  |
| H | 3.53798699  | 4.15678692  | 3.71241593  |
| C | 2.17183995  | 5.62067890  | 4.52311182  |
| H | 2.52294111  | 6.46598387  | 3.90942907  |
| H | 1.09308505  | 5.76439619  | 4.69625521  |
| H | 2.67687511  | 5.68572903  | 5.49880886  |
| C | -0.54609501 | 4.62354422  | -0.14915600 |
| H | 0.00411600  | 5.22004223  | 0.59600103  |
| H | -0.11862900 | 4.88702488  | -1.13161397 |
| C | -2.01687908 | 5.03103113  | -0.12312400 |
| H | -2.58425212 | 4.42301416  | -0.84901702 |
| H | -2.43951797 | 4.78392076  | 0.86686802  |
| C | -2.23105502 | 6.50779676  | -0.41665700 |
| H | -3.29933596 | 6.77107000  | -0.38865599 |
| H | -1.71127200 | 7.14382792  | 0.31820101  |
| H | -1.84877503 | 6.77670717  | -1.41473401 |
| C | 2.92363310  | 4.64895821  | -0.83956897 |
| H | 3.58081794  | 4.59943199  | 0.04545600  |
| H | 2.12765598  | 5.37016487  | -0.59418899 |
| C | 3.72917008  | 5.17730808  | -2.02295709 |
| H | 4.52500296  | 4.45225811  | -2.26925206 |
| H | 3.07659793  | 5.22165394  | -2.91263509 |
| C | 4.34144402  | 6.54546499  | -1.76654506 |
| H | 3.56512189  | 7.29738092  | -1.55140305 |
| H | 5.02644587  | 6.52223682  | -0.90358901 |
| H | 4.91480923  | 6.89919090  | -2.63686204 |
| C | -0.50395298 | -0.08463400 | -0.11569500 |
| C | -1.74744201 | -0.19441800 | -0.02948700 |
| C | -3.14693093 | -0.13141100 | -0.02190900 |
| C | -4.01205921 | -1.15184104 | 0.54955798  |
| C | -3.73813391 | 0.99527103  | -0.62064701 |
| C | -5.41390800 | -0.99825001 | 0.45884001  |
| C | -3.46655607 | -2.31698298 | 1.24596500  |
| C | -5.11489820 | 1.14986205  | -0.71495402 |
| H | -3.10042810 | 1.77057803  | -1.04622495 |
| C | -6.29336309 | -1.97166097 | 0.99636298  |
| C | -5.97886515 | 0.15240100  | -0.18360400 |
| O | -2.26735711 | -2.52236104 | 1.39873099  |
| N | -4.37661505 | -3.24118209 | 1.76139295  |
| C | -5.67190123 | 2.33483505  | -1.36233497 |
| C | -5.76450205 | -3.15540910 | 1.67502904  |
| C | -7.68656111 | -1.81349897 | 0.88888198  |
| C | -7.37051916 | 0.28992000  | -0.27477801 |

|   |             |             |             |
|---|-------------|-------------|-------------|
| C | -3.80213189 | -4.38354492 | 2.45000005  |
| O | -4.98862791 | 3.23601198  | -1.83452797 |
| N | -7.06300783 | 2.41332006  | -1.42965806 |
| O | -6.48345709 | -4.02421188 | 2.15029407  |
| C | -8.21960258 | -0.70307302 | 0.26355600  |
| H | -8.32638931 | -2.58840609 | 1.31371701  |
| C | -7.95820522 | 1.46445298  | -0.92688900 |
| H | -3.24590397 | -5.01972723 | 1.74615896  |
| H | -3.10468793 | -4.04225922 | 3.22605109  |
| H | -4.62344408 | -4.95385313 | 2.89335704  |
| C | -7.60313797 | 3.59396791  | -2.07929301 |
| H | -9.29834843 | -0.56453598 | 0.17343201  |
| O | -9.16673756 | 1.62244499  | -1.03275502 |
| H | -7.23352194 | 3.66125298  | -3.11193609 |
| H | -8.69392014 | 3.51314902  | -2.07128191 |
| H | -7.28565407 | 4.50100613  | -1.54587305 |
| H | 9.93801975  | 0.85262001  | 0.41330099  |

### Frequencies

| Mode | IR frequency | IR intensity |
|------|--------------|--------------|
| 1    | 7.60550000   | 0.12080000   |
| 2    | 8.98670000   | 0.12340000   |
| 3    | 10.52830000  | 0.14710000   |
| 4    | 11.18430000  | 0.18940000   |
| 5    | 16.25360000  | 0.10320000   |
| 6    | 16.95550000  | 0.22610000   |
| 7    | 19.84530000  | 0.37840000   |
| 8    | 22.17810000  | 0.54860000   |
| 9    | 25.78040000  | 0.02640000   |
| 10   | 34.66140000  | 0.63360000   |
| 11   | 39.56560000  | 0.03700000   |
| 12   | 40.09370000  | 0.02380000   |
| 13   | 40.67390000  | 0.09200000   |
| 14   | 41.51810000  | 0.00950000   |
| 15   | 45.08260000  | 0.76800000   |
| 16   | 51.20040000  | 0.02600000   |
| 17   | 53.93880000  | 0.06050000   |
| 18   | 56.68250000  | 0.32380000   |
| 19   | 61.59510000  | 0.64740000   |
| 20   | 63.55060000  | 0.21680000   |
| 21   | 66.79470000  | 0.58350000   |
| 22   | 68.12010000  | 0.76560000   |
| 23   | 70.03160000  | 0.21650000   |
| 24   | 74.21080000  | 0.23020000   |
| 25   | 77.98830000  | 0.18070000   |
| 26   | 80.55330000  | 0.35370000   |
| 27   | 81.90890000  | 0.36330000   |
| 28   | 87.58870000  | 2.64840000   |
| 29   | 90.84080000  | 1.58880000   |
| 30   | 96.03220000  | 0.65530000   |
| 31   | 100.12580000 | 0.38010000   |



|    |              |              |
|----|--------------|--------------|
| 32 | 105.11580000 | 5.24690000   |
| 33 | 106.92510000 | 0.94470000   |
| 34 | 113.04410000 | 6.04450000   |
| 35 | 114.80190000 | 0.39010000   |
| 36 | 116.76510000 | 0.02400000   |
| 37 | 122.04040000 | 2.03300000   |
| 38 | 123.33720000 | 6.47540000   |
| 39 | 135.02890000 | 14.33730000  |
| 40 | 139.04760000 | 9.89700000   |
| 41 | 139.47430000 | 15.95430000  |
| 42 | 143.64140000 | 1.62490000   |
| 43 | 149.17020000 | 3.21200000   |
| 44 | 150.93920000 | 3.93420000   |
| 45 | 161.03400000 | 1.35040000   |
| 46 | 164.00120000 | 0.25880000   |
| 47 | 164.97830000 | 10.36390000  |
| 48 | 167.04980000 | 14.25600000  |
| 49 | 168.39580000 | 35.44780000  |
| 50 | 173.18800000 | 1.90920000   |
| 51 | 174.54800000 | 2.49850000   |
| 52 | 177.03600000 | 2.86520000   |
| 53 | 198.50060000 | 7.23350000   |
| 54 | 202.72150000 | 62.24990000  |
| 55 | 214.80770000 | 267.07700000 |
| 56 | 218.50800000 | 2.95980000   |
| 57 | 219.67790000 | 32.61860000  |
| 58 | 223.01440000 | 27.15090000  |
| 59 | 224.02200000 | 28.88560000  |
| 60 | 225.93640000 | 36.92890000  |
| 61 | 233.64270000 | 0.84200000   |
| 62 | 234.65940000 | 0.34440000   |
| 63 | 257.13980000 | 0.13720000   |
| 64 | 257.86250000 | 0.15900000   |
| 65 | 258.26590000 | 0.04840000   |
| 66 | 258.41260000 | 0.24610000   |
| 67 | 259.02320000 | 0.07740000   |
| 68 | 259.84920000 | 0.25730000   |
| 69 | 269.18110000 | 2.88170000   |
| 70 | 282.60750000 | 0.51310000   |
| 71 | 294.05310000 | 58.06920000  |
| 72 | 300.92720000 | 1.39890000   |
| 73 | 311.86430000 | 4.33900000   |
| 74 | 328.83770000 | 120.31280000 |
| 75 | 337.14240000 | 4.85590000   |
| 76 | 338.74190000 | 46.44730000  |
| 77 | 341.73800000 | 7.02120000   |
| 78 | 343.36930000 | 11.85700000  |
| 79 | 348.80470000 | 11.18240000  |
| 80 | 371.07600000 | 97.74930000  |
| 81 | 374.71850000 | 56.69680000  |
| 82 | 377.93200000 | 15.47580000  |

|     |              |              |
|-----|--------------|--------------|
| 83  | 383.42720000 | 72.26530000  |
| 84  | 389.19010000 | 151.55350000 |
| 85  | 404.82670000 | 1.51510000   |
| 86  | 410.43190000 | 9.46460000   |
| 87  | 411.03400000 | 18.92510000  |
| 88  | 412.34340000 | 82.53590000  |
| 89  | 413.69500000 | 11.69290000  |
| 90  | 414.05250000 | 2.16830000   |
| 91  | 420.66470000 | 21.63010000  |
| 92  | 421.56050000 | 94.19550000  |
| 93  | 437.65110000 | 37.16070000  |
| 94  | 442.44120000 | 24.13300000  |
| 95  | 462.00620000 | 88.79700000  |
| 96  | 484.42190000 | 10.83030000  |
| 97  | 502.27280000 | 55.23430000  |
| 98  | 507.99130000 | 83.05690000  |
| 99  | 520.92060000 | 364.17320000 |
| 100 | 523.98120000 | 53.99590000  |
| 101 | 546.24160000 | 9.16030000   |
| 102 | 549.36870000 | 4.20440000   |
| 103 | 565.04270000 | 9.19320000   |
| 104 | 572.56810000 | 0.52900000   |
| 105 | 577.43470000 | 14.87540000  |
| 106 | 587.27310000 | 127.69890000 |
| 107 | 592.74260000 | 27.50320000  |
| 108 | 607.72340000 | 251.24080000 |
| 109 | 630.30090000 | 48.27690000  |
| 110 | 630.83730000 | 217.35850000 |
| 111 | 661.42390000 | 10.56610000  |
| 112 | 691.82500000 | 30.67470000  |
| 113 | 692.94410000 | 27.40130000  |
| 114 | 702.87350000 | 8.14980000   |
| 115 | 706.22900000 | 21.80640000  |
| 116 | 711.99170000 | 51.35690000  |
| 117 | 722.54200000 | 23.36070000  |
| 118 | 722.91540000 | 22.92460000  |
| 119 | 723.52180000 | 4.43810000   |
| 120 | 728.33080000 | 14.97400000  |
| 121 | 741.21320000 | 1.47590000   |
| 122 | 743.65590000 | 2.15100000   |
| 123 | 756.27190000 | 1.50410000   |
| 124 | 756.62590000 | 3.10940000   |
| 125 | 757.48820000 | 22.39360000  |
| 126 | 762.59750000 | 1.56730000   |
| 127 | 763.04470000 | 5.64850000   |
| 128 | 763.56340000 | 6.24180000   |
| 129 | 765.45670000 | 16.88730000  |
| 130 | 765.65810000 | 42.26320000  |
| 131 | 779.41540000 | 4.57740000   |
| 132 | 788.17360000 | 77.24060000  |
| 133 | 789.72000000 | 3.99330000   |

|     |               |               |
|-----|---------------|---------------|
| 134 | 792.30000000  | 15.40590000   |
| 135 | 792.48010000  | 4.46570000    |
| 136 | 794.01740000  | 8.73600000    |
| 137 | 794.65210000  | 65.83810000   |
| 138 | 797.17000000  | 26.71350000   |
| 139 | 818.96030000  | 1178.00690000 |
| 140 | 851.52040000  | 2.89050000    |
| 141 | 863.05870000  | 502.61490000  |
| 142 | 864.24350000  | 0.09500000    |
| 143 | 872.29490000  | 6.79570000    |
| 144 | 885.25250000  | 5.70120000    |
| 145 | 885.86210000  | 5.89120000    |
| 146 | 904.85350000  | 0.24550000    |
| 147 | 905.01920000  | 3.29470000    |
| 148 | 905.47820000  | 21.42630000   |
| 149 | 906.50280000  | 12.14840000   |
| 150 | 915.30930000  | 4.17240000    |
| 151 | 915.66790000  | 15.31270000   |
| 152 | 915.71970000  | 7.75040000    |
| 153 | 915.93100000  | 2.78690000    |
| 154 | 916.62630000  | 45.43570000   |
| 155 | 917.72100000  | 20.19670000   |
| 156 | 920.75960000  | 829.27310000  |
| 157 | 947.27170000  | 13.27190000   |
| 158 | 955.20750000  | 5.32250000    |
| 159 | 969.67320000  | 189.46950000  |
| 160 | 1010.63520000 | 202.06980000  |
| 161 | 1011.54900000 | 1.59660000    |
| 162 | 1014.64290000 | 0.08660000    |
| 163 | 1028.52010000 | 53.61420000   |
| 164 | 1034.08160000 | 0.06410000    |
| 165 | 1036.96800000 | 10.91600000   |
| 166 | 1038.84720000 | 28.20870000   |
| 167 | 1042.13430000 | 616.83970000  |
| 168 | 1051.66520000 | 2.19240000    |
| 169 | 1052.24600000 | 7.51180000    |
| 170 | 1052.68180000 | 4.74040000    |
| 171 | 1053.05980000 | 0.49700000    |
| 172 | 1053.31920000 | 4.57530000    |
| 173 | 1054.20690000 | 5.56840000    |
| 174 | 1055.04580000 | 29.41400000   |
| 175 | 1060.82670000 | 162.64780000  |
| 176 | 1075.21270000 | 2.84600000    |
| 177 | 1076.13130000 | 4.31930000    |
| 178 | 1076.82470000 | 25.41870000   |
| 179 | 1079.15960000 | 6.57480000    |
| 180 | 1087.36580000 | 102.66850000  |
| 181 | 1088.96090000 | 2.09410000    |
| 182 | 1089.89730000 | 0.30170000    |
| 183 | 1090.05910000 | 2.90290000    |
| 184 | 1090.27040000 | 4.43460000    |

|     |               |               |
|-----|---------------|---------------|
| 185 | 1092.36370000 | 7.13980000    |
| 186 | 1092.76080000 | 1.75270000    |
| 187 | 1101.28720000 | 12.18730000   |
| 188 | 1116.28820000 | 5.91790000    |
| 189 | 1116.53230000 | 1.53120000    |
| 190 | 1117.22700000 | 40.31690000   |
| 191 | 1117.30970000 | 20.50090000   |
| 192 | 1120.69040000 | 121.14740000  |
| 193 | 1123.23360000 | 230.12680000  |
| 194 | 1140.37440000 | 1.55870000    |
| 195 | 1141.61900000 | 0.21760000    |
| 196 | 1156.54130000 | 0.40660000    |
| 197 | 1165.31880000 | 0.24510000    |
| 198 | 1177.01680000 | 2148.85290000 |
| 199 | 1181.34660000 | 2.88860000    |
| 200 | 1212.84620000 | 174.48930000  |
| 201 | 1213.92780000 | 0.97730000    |
| 202 | 1215.81720000 | 4.04200000    |
| 203 | 1216.82290000 | 2.29030000    |
| 204 | 1217.44930000 | 7.90820000    |
| 205 | 1217.63350000 | 6.07910000    |
| 206 | 1218.42320000 | 21.74230000   |
| 207 | 1227.74610000 | 121.68840000  |
| 208 | 1229.57830000 | 1.75940000    |
| 209 | 1230.16040000 | 1.91240000    |
| 210 | 1230.53540000 | 1.82150000    |
| 211 | 1234.23920000 | 5.55160000    |
| 212 | 1248.81210000 | 233.10700000  |
| 213 | 1250.71640000 | 221.24320000  |
| 214 | 1256.00450000 | 226.36840000  |
| 215 | 1261.80890000 | 19.92310000   |
| 216 | 1267.12150000 | 5197.03530000 |
| 217 | 1291.30920000 | 0.76670000    |
| 218 | 1292.88850000 | 1.60490000    |
| 219 | 1294.88950000 | 3.30970000    |
| 220 | 1296.90250000 | 12.01490000   |
| 221 | 1297.30260000 | 29.56370000   |
| 222 | 1299.66340000 | 4.90900000    |
| 223 | 1313.63940000 | 1274.02550000 |
| 224 | 1317.05850000 | 0.12990000    |
| 225 | 1319.15170000 | 2.59640000    |
| 226 | 1319.35350000 | 1.69980000    |
| 227 | 1319.60520000 | 15.88910000   |
| 228 | 1319.95610000 | 0.87120000    |
| 229 | 1319.97990000 | 5.27020000    |
| 230 | 1321.10280000 | 3.21370000    |
| 231 | 1321.56830000 | 252.10560000  |
| 232 | 1322.13300000 | 620.47790000  |
| 233 | 1322.30690000 | 23.20860000   |
| 234 | 1323.28640000 | 363.27190000  |
| 235 | 1324.14610000 | 418.39280000  |

|     |               |               |
|-----|---------------|---------------|
| 236 | 1326.98700000 | 15.46060000   |
| 237 | 1330.09680000 | 19.16700000   |
| 238 | 1368.67570000 | 686.04150000  |
| 239 | 1372.65830000 | 4665.34050000 |
| 240 | 1381.44410000 | 0.38920000    |
| 241 | 1381.73190000 | 0.10380000    |
| 242 | 1381.93980000 | 0.20600000    |
| 243 | 1382.29740000 | 0.57140000    |
| 244 | 1384.27240000 | 0.04290000    |
| 245 | 1384.86070000 | 1.32240000    |
| 246 | 1385.05820000 | 1.92570000    |
| 247 | 1398.84630000 | 9.49670000    |
| 248 | 1398.90020000 | 77.85790000   |
| 249 | 1399.00550000 | 11.66920000   |
| 250 | 1399.39460000 | 1.44450000    |
| 251 | 1400.25850000 | 1279.96560000 |
| 252 | 1401.62800000 | 20.56920000   |
| 253 | 1401.74800000 | 108.32350000  |
| 254 | 1402.19450000 | 14.96740000   |
| 255 | 1416.40740000 | 27.54850000   |
| 256 | 1420.02360000 | 93.79980000   |
| 257 | 1420.72450000 | 86.12550000   |
| 258 | 1422.60730000 | 63.53670000   |
| 259 | 1422.69890000 | 1588.40580000 |
| 260 | 1424.97640000 | 14.23280000   |
| 261 | 1430.69200000 | 15.28090000   |
| 262 | 1447.46980000 | 6.15670000    |
| 263 | 1447.70650000 | 5.06660000    |
| 264 | 1449.36720000 | 1.47710000    |
| 265 | 1449.41820000 | 2.50110000    |
| 266 | 1450.02670000 | 28.10330000   |
| 267 | 1451.48050000 | 6.07720000    |
| 268 | 1452.44950000 | 120.38440000  |
| 269 | 1452.97060000 | 296.37130000  |
| 270 | 1456.30690000 | 25.91820000   |
| 271 | 1458.44010000 | 8.93710000    |
| 272 | 1458.74050000 | 8.57480000    |
| 273 | 1458.78680000 | 12.19510000   |
| 274 | 1458.82100000 | 8.11860000    |
| 275 | 1458.82560000 | 9.60290000    |
| 276 | 1459.09650000 | 6.78520000    |
| 277 | 1460.16770000 | 11.52360000   |
| 278 | 1460.41150000 | 3.07370000    |
| 279 | 1461.73260000 | 120.40900000  |
| 280 | 1465.37010000 | 0.10060000    |
| 281 | 1465.70090000 | 0.34460000    |
| 282 | 1465.73480000 | 0.29540000    |
| 283 | 1465.88100000 | 0.01170000    |
| 284 | 1467.04100000 | 49.35250000   |
| 285 | 1473.34500000 | 3.92320000    |
| 286 | 1473.84680000 | 8.50150000    |

|     |               |                |
|-----|---------------|----------------|
| 287 | 1476.70200000 | 14.65740000    |
| 288 | 1477.42040000 | 15.53900000    |
| 289 | 1477.53520000 | 21.74620000    |
| 290 | 1478.38150000 | 14.54540000    |
| 291 | 1478.91110000 | 10.32570000    |
| 292 | 1481.72490000 | 8.61420000     |
| 293 | 1492.33750000 | 195.20730000   |
| 294 | 1514.63140000 | 1592.20400000  |
| 295 | 1523.98360000 | 1.67480000     |
| 296 | 1544.28530000 | 489.23830000   |
| 297 | 1560.70720000 | 9353.16790000  |
| 298 | 1601.15940000 | 2653.56690000  |
| 299 | 1638.70720000 | 1.58740000     |
| 300 | 1659.11750000 | 1164.09890000  |
| 301 | 1671.60200000 | 364.38990000   |
| 302 | 1712.21570000 | 796.47890000   |
| 303 | 1731.79730000 | 2066.39180000  |
| 304 | 1756.56000000 | 1590.32360000  |
| 305 | 1774.14520000 | 2739.63730000  |
| 306 | 2036.28790000 | 22708.39400000 |
| 307 | 2163.60860000 | 3422.82410000  |
| 308 | 3044.51140000 | 33.61460000    |
| 309 | 3045.01470000 | 30.76510000    |
| 310 | 3045.11050000 | 37.10360000    |
| 311 | 3045.45360000 | 33.39990000    |
| 312 | 3046.59680000 | 38.22870000    |
| 313 | 3046.86520000 | 37.76720000    |
| 314 | 3048.05520000 | 10.34220000    |
| 315 | 3048.65280000 | 29.33070000    |
| 316 | 3048.72280000 | 10.78920000    |
| 317 | 3048.79560000 | 54.76890000    |
| 318 | 3048.95330000 | 33.40720000    |
| 319 | 3049.33590000 | 10.79070000    |
| 320 | 3055.89210000 | 35.26330000    |
| 321 | 3058.94470000 | 28.41910000    |
| 322 | 3059.23710000 | 22.85890000    |
| 323 | 3060.78880000 | 15.65380000    |
| 324 | 3061.12860000 | 23.19020000    |
| 325 | 3061.97330000 | 44.72260000    |
| 326 | 3064.80600000 | 47.47860000    |
| 327 | 3067.06980000 | 46.77750000    |
| 328 | 3067.11540000 | 8.54190000     |
| 329 | 3067.63360000 | 29.44880000    |
| 330 | 3069.15380000 | 21.25000000    |
| 331 | 3071.48790000 | 14.91870000    |
| 332 | 3080.57690000 | 63.61940000    |
| 333 | 3081.48790000 | 31.87570000    |
| 334 | 3090.01530000 | 11.31070000    |
| 335 | 3090.05720000 | 11.27620000    |
| 336 | 3090.37130000 | 10.12040000    |
| 337 | 3090.60300000 | 8.89380000     |

|     |               |              |
|-----|---------------|--------------|
| 338 | 3094.23970000 | 4.31210000   |
| 339 | 3096.40730000 | 2.67050000   |
| 340 | 3115.71150000 | 6.88580000   |
| 341 | 3116.24300000 | 30.26690000  |
| 342 | 3116.57480000 | 21.06350000  |
| 343 | 3118.61930000 | 13.41040000  |
| 344 | 3119.14740000 | 12.40430000  |
| 345 | 3120.10090000 | 13.24990000  |
| 346 | 3131.26970000 | 4.06820000   |
| 347 | 3131.42450000 | 13.09330000  |
| 348 | 3132.41620000 | 11.40830000  |
| 349 | 3135.13990000 | 2.76690000   |
| 350 | 3136.57140000 | 10.17650000  |
| 351 | 3136.89070000 | 2.10060000   |
| 352 | 3137.67030000 | 57.92850000  |
| 353 | 3138.79820000 | 53.92270000  |
| 354 | 3139.03150000 | 52.17480000  |
| 355 | 3139.14180000 | 53.53300000  |
| 356 | 3139.23630000 | 54.38810000  |
| 357 | 3139.26470000 | 64.35200000  |
| 358 | 3146.31650000 | 28.86150000  |
| 359 | 3147.65000000 | 27.79900000  |
| 360 | 3147.97900000 | 37.38590000  |
| 361 | 3148.03490000 | 24.38170000  |
| 362 | 3148.07140000 | 36.56440000  |
| 363 | 3148.30360000 | 30.82260000  |
| 364 | 3168.31500000 | 11.97030000  |
| 365 | 3172.22450000 | 11.30970000  |
| 366 | 3207.33550000 | 10.89740000  |
| 367 | 3213.27030000 | 0.19050000   |
| 368 | 3220.79820000 | 8.32970000   |
| 369 | 3226.36000000 | 16.07230000  |
| 370 | 3229.76500000 | 3.39930000   |
| 371 | 3230.02830000 | 1.35970000   |
| 372 | 3232.64810000 | 179.52190000 |
| 373 | 3233.77450000 | 5.25100000   |
| 374 | 3243.98030000 | 5.15800000   |
| 375 | 3246.54060000 | 22.45400000  |

## 5: PTZ-CH<sub>2</sub>-Ph-CC-Pt-CC-NDI in CH<sub>2</sub>Cl<sub>2</sub>, SINGLET

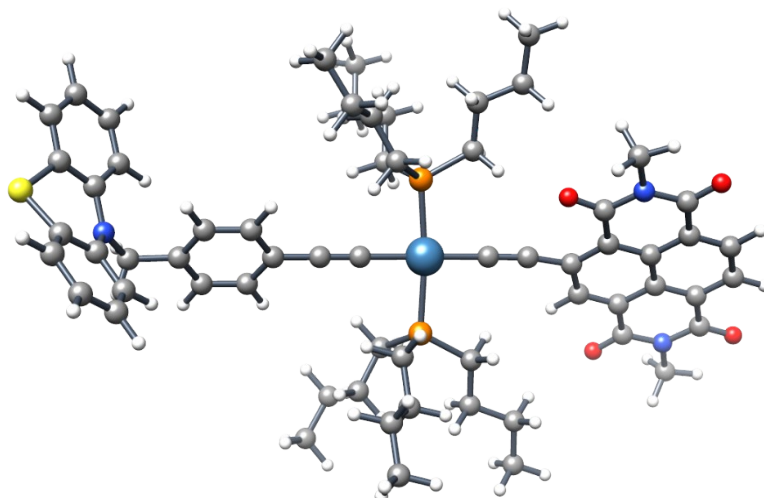

Optimised singlet ground state geometry of PTZ-CH<sub>2</sub>-Ph-CC-Pt-CC-NDI.

Route : #p opt freq PBE1PBE/genecp  
: scrf=(cpcm,solvent=dichloromethane) geom=connectivity  
: int=acc2e=13  
SMILES : CCCC[P](CCCC)(CCCC)[Pt]  
: (C#Cc1ccc(cc1)CN2c3cccc3Sc4c2cccc4)  
: (C#Cc5cc6c7c(ccc8c7c5C(=O)N(C8=O)C)  
: C(=O)N(C6=O)C)[P](CCCC)(CCCC)CCCC  
Formula : C<sub>63</sub>H<sub>77</sub>N<sub>3</sub>O<sub>4</sub>P<sub>2</sub>PtS  
Charge : 0  
Multiplicity : 1  
Dipole : 9.3905 Debye  
Energy : -4106.57159541 a.u.  
Gibbs Energy : -4105.43083300 a.u.  
Number of imaginary frequencies : 0

Cartesian Co-ordinates (XYZ format)

151

|    |             |             |             |
|----|-------------|-------------|-------------|
| Pt | -0.67170203 | 0.09829000  | -0.34161201 |
| C  | 1.30708897  | 0.40870401  | -0.47785801 |
| P  | -0.89738500 | 2.42610598  | -0.10244000 |
| P  | -0.19926099 | -2.18504190 | -0.59729600 |
| C  | 2.52306104  | 0.59723002  | -0.55508399 |



|   |             |             |             |             |             |
|---|-------------|-------------|-------------|-------------|-------------|
|   |             | C           | 3.93193412  | 0.81645697  | -0.65006602 |
|   |             | C           | 4.84685802  | 0.00463600  | 0.04656300  |
|   |             | C           | 4.45505810  | 1.85690606  | -1.44591796 |
|   |             | C           | 6.21850491  | 0.22479101  | -0.04627900 |
|   |             | H           | 4.46972179  | -0.80804300 | 0.67157900  |
|   |             | C           | 5.82482195  | 2.06806111  | -1.53534997 |
|   |             | H           | 3.76765895  | 2.50255704  | -1.99731505 |
| C | 6.73002911  | 1.25705898  | -0.83768499 |             |             |
| H | 6.90265894  | -0.41891900 | 0.51224101  |             |             |
| H | 6.20079184  | 2.88446593  | -2.15947294 |             |             |
| C | -0.08201200 | 3.28625488  | -1.51364195 |             |             |
| H | 0.75430202  | 2.62433600  | -1.78883696 |             |             |
| H | -0.80576098 | 3.22989106  | -2.34592891 |             |             |
| C | -2.63480711 | 3.02665591  | -0.02850700 |             |             |
| H | -3.00999498 | 2.73025489  | 0.96646702  |             |             |
| H | -3.17520595 | 2.38341308  | -0.74067497 |             |             |
| C | -0.05293200 | 2.92037702  | 1.45939004  |             |             |
| H | -0.29134399 | 2.11179495  | 2.17061090  |             |             |
| H | 1.02423000  | 2.81282902  | 1.24495006  |             |             |
| C | -1.65568697 | -3.30384302 | -0.54600197 |             |             |
| H | -2.15949893 | -3.17714691 | -1.52051795 |             |             |
| H | -2.33970594 | -2.85921693 | 0.19497900  |             |             |
| C | 0.62866902  | -2.40524602 | -2.22922611 |             |             |
| H | 0.07973000  | -1.73198199 | -2.90928411 |             |             |
| H | 1.62470901  | -1.94677103 | -2.10649109 |             |             |
| C | 0.96107101  | -2.72107196 | 0.73215002  |             |             |
| H | 1.55294096  | -1.81970799 | 0.95608097  |             |             |
| H | 0.32749999  | -2.90171409 | 1.61829305  |             |             |
| C | 0.72388101  | -3.79379201 | -2.85299802 |             |             |
| H | -0.28872600 | -4.20670700 | -2.99960303 |             |             |
| H | 1.24617004  | -4.49012709 | -2.17723298 |             |             |
| C | 1.44505501  | -3.76803589 | -4.19738817 |             |             |
| H | 2.45931602  | -3.35523200 | -4.05468416 |             |             |
| H | 0.92653698  | -3.06347203 | -4.87143612 |             |             |
| C | 1.53517795  | -5.13622093 | -4.85524797 |             |             |
| H | 2.06264901  | -5.08595181 | -5.82000589 |             |             |
| H | 2.07712793  | -5.85235310 | -4.21653509 |             |             |
| H | 0.53398502  | -5.55587482 | -5.04492903 |             |             |
| C | -1.43762696 | -4.78069019 | -0.23091900 |             |             |
| H | -0.74865299 | -5.24410200 | -0.95574301 |             |             |
| H | -0.95622700 | -4.87988377 | 0.75721699  |             |             |
| C | -2.74860001 | -5.56175804 | -0.21827000 |             |             |
| H | -3.23516297 | -5.46542883 | -1.20504797 |             |             |
| H | -3.43637490 | -5.08963823 | 0.50433999  |             |             |
| C | -2.56647205 | -7.03257895 | 0.12236200  |             |             |
| H | -3.52784896 | -7.56875181 | 0.12282800  |             |             |
| H | -1.90654099 | -7.53372097 | -0.60437602 |             |             |
| H | -2.11439204 | -7.15954590 | 1.11944795  |             |             |
| C | 1.90155303  | -3.89616895 | 0.48288199  |             |             |
| H | 1.33756995  | -4.80590916 | 0.22165599  |             |             |
| H | 2.54706407  | -3.67269993 | -0.38375601 |             |             |

|   |             |             |             |
|---|-------------|-------------|-------------|
| C | 2.78462791  | -4.18824720 | 1.69248796  |
| H | 3.34156609  | -3.27320194 | 1.96155000  |
| H | 2.14274192  | -4.41537380 | 2.56191301  |
| C | 3.75895691  | -5.33256578 | 1.45993400  |
| H | 4.43589687  | -5.11581993 | 0.61780798  |
| H | 4.38182688  | -5.51868916 | 2.34810400  |
| H | 3.22791505  | -6.26888514 | 1.22366095  |
| C | -0.36418900 | 4.27090597  | 2.09451890  |
| H | -1.43991196 | 4.33071280  | 2.33235097  |
| H | -0.15818600 | 5.09052992  | 1.38761103  |
| C | 0.43718800  | 4.50287724  | 3.37222099  |
| H | 0.23807500  | 3.67753100  | 4.07836580  |
| H | 1.51466095  | 4.44426203  | 3.13770604  |
| C | 0.12810799  | 5.83465576  | 4.03814411  |
| H | 0.35026500  | 6.67929697  | 3.36604905  |
| H | -0.93595397 | 5.90554285  | 4.31596899  |
| H | 0.72124499  | 5.97421408  | 4.95471191  |
| C | -2.94180393 | 4.49202585  | -0.31968600 |
| H | -2.39079595 | 5.15387678  | 0.36769399  |
| H | -2.59742999 | 4.74809408  | -1.33610797 |
| C | -4.43365192 | 4.79674482  | -0.21294101 |
| H | -4.99302912 | 4.13551092  | -0.89800900 |
| H | -4.78129196 | 4.53887606  | 0.80313802  |
| C | -4.76993608 | 6.24867678  | -0.51599699 |
| H | -5.85050583 | 6.43837786  | -0.42726400 |
| H | -4.25356913 | 6.93289185  | 0.17669600  |
| H | -4.46717978 | 6.52482080  | -1.53903496 |
| C | 0.43301901  | 4.71086407  | -1.33167899 |
| H | 1.18956804  | 4.72824192  | -0.52857101 |
| H | -0.37573099 | 5.38550806  | -1.00827301 |
| C | 1.05809999  | 5.26151896  | -2.61006093 |
| H | 1.86403704  | 4.58216381  | -2.94000006 |
| H | 0.30368000  | 5.24562883  | -3.41635609 |
| C | 1.60790503  | 6.67024422  | -2.44913101 |
| H | 0.81607300  | 7.37770319  | -2.15420794 |
| H | 2.38964009  | 6.70837116  | -1.67329001 |
| H | 2.05124497  | 7.03948784  | -3.38645601 |
| C | -2.62609410 | -0.19777900 | -0.17229600 |
| C | -3.83880806 | -0.37827399 | -0.00998600 |
| C | -5.24877787 | -0.38290501 | 0.09035600  |
| C | -6.02207422 | -1.25317705 | 0.88652402  |
| C | -5.93658686 | 0.61157203  | -0.67545700 |
| C | -7.43511009 | -1.11496103 | 0.92600298  |
| C | -5.39231777 | -2.31830597 | 1.69321597  |
| C | -7.30048990 | 0.75185603  | -0.64104700 |
| H | -5.35515499 | 1.28682005  | -1.30435705 |
| C | -8.23536968 | -1.96398699 | 1.72664499  |
| C | -8.08397293 | -0.11134600 | 0.16211200  |
| O | -4.19531679 | -2.53424597 | 1.70923400  |
| N | -6.22992516 | -3.12105608 | 2.47594309  |
| C | -7.95087624 | 1.81745803  | -1.44192195 |

|   |              |             |             |
|---|--------------|-------------|-------------|
| C | -7.61338806  | -3.02428102 | 2.54946589  |
| C | -9.61487103  | -1.81497598 | 1.75712395  |
| C | -9.48499775  | 0.02453500  | 0.20386900  |
| C | -5.56975508  | -4.15168905 | 3.26034498  |
| O | -7.32376909  | 2.59680891  | -2.13207197 |
| N | -9.33726692  | 1.90028596  | -1.37229800 |
| O | -8.26985836  | -3.77090597 | 3.25098705  |
| C | -10.24542427 | -0.82277399 | 0.99644601  |
| H | -10.19440079 | -2.49004197 | 2.38929796  |
| C | -10.15807438 | 1.07537699  | -0.60038501 |
| H | -5.11360884  | -4.90290213 | 2.59963989  |
| H | -4.77619219  | -3.70487905 | 3.87274599  |
| H | -6.32353306  | -4.62560177 | 3.89531708  |
| C | -9.95708466  | 2.94719601  | -2.16911507 |
| H | -11.32955170 | -0.70083702 | 1.01495099  |
| O | -11.36376667 | 1.21793795  | -0.59119803 |
| H | -9.69980335  | 2.81531692  | -3.22867393 |
| H | -11.03987694 | 2.88021302  | -2.03189492 |
| H | -9.59505177  | 3.93286896  | -1.84589100 |
| C | 8.21523476   | 1.53390396  | -0.96979201 |
| H | 8.40491962   | 2.59406590  | -0.73576999 |
| H | 8.51446247   | 1.41042304  | -2.02337193 |
| N | 9.11505127   | 0.73758698  | -0.16220200 |
| C | 9.54722309   | -0.50446701 | -0.65369397 |
| C | 9.34715557   | 1.12622499  | 1.16696703  |
| C | 10.69285965  | -1.13446999 | -0.12727500 |
| C | 8.86226940   | -1.16055703 | -1.68937194 |
| C | 10.47261429  | 0.65877801  | 1.87518597  |
| C | 8.47498894   | 2.00070596  | 1.83539903  |
| C | 11.10865211  | -2.37840390 | -0.60101199 |
| S | 11.70860767  | -0.29369599 | 1.04760396  |
| C | 9.30634499   | -2.38588595 | -2.18623400 |
| H | 7.96060514   | -0.71690702 | -2.11223197 |
| C | 10.68902302  | 1.02840602  | 3.20226407  |
| C | 8.71822929   | 2.39793205  | 3.15007210  |
| H | 7.58397818   | 2.37202191  | 1.32912195  |
| C | 10.42598248  | -3.00729489 | -1.64145696 |
| H | 11.99429798  | -2.84252596 | -0.15952800 |
| H | 8.75304317   | -2.85975790 | -3.00038791 |
| H | 11.56552982  | 0.63540602  | 3.72376108  |
| C | 9.82005215   | 1.90927196  | 3.84536600  |
| H | 8.02229118   | 3.08795500  | 3.63284397  |
| H | 10.77033138  | -3.97241592 | -2.01871896 |
| H | 10.00801563  | 2.20783710  | 4.87874794  |

## Frequencies

| Mode | IR frequency | IR intensity |
|------|--------------|--------------|
| 1    | 3.81110000   | 0.08340000   |
| 2    | 5.90140000   | 0.07250000   |
| 3    | 8.41870000   | 0.06200000   |
| 4    | 9.27230000   | 0.02980000   |
| 5    | 11.98640000  | 0.14650000   |
| 6    | 13.52570000  | 0.05880000   |
| 7    | 15.26280000  | 0.20550000   |
| 8    | 18.06000000  | 0.00910000   |
| 9    | 21.71330000  | 0.26080000   |
| 10   | 25.39590000  | 0.47050000   |
| 11   | 27.54480000  | 0.31960000   |
| 12   | 36.11930000  | 0.05470000   |
| 13   | 40.30210000  | 0.02550000   |
| 14   | 40.81730000  | 0.01170000   |
| 15   | 41.30720000  | 0.08130000   |
| 16   | 42.48310000  | 0.11470000   |
| 17   | 44.38030000  | 0.13840000   |
| 18   | 47.15690000  | 0.10230000   |
| 19   | 51.24540000  | 0.21780000   |
| 20   | 53.29120000  | 0.81690000   |
| 21   | 54.85700000  | 0.13560000   |
| 22   | 55.81960000  | 0.39720000   |
| 23   | 61.86430000  | 0.04590000   |
| 24   | 62.54040000  | 0.10040000   |
| 25   | 64.89720000  | 0.19120000   |
| 26   | 66.71730000  | 0.22040000   |
| 27   | 69.20530000  | 0.31020000   |
| 28   | 73.82620000  | 0.33490000   |
| 29   | 76.41120000  | 1.66990000   |
| 30   | 80.68460000  | 1.44760000   |
| 31   | 83.71260000  | 1.30360000   |
| 32   | 87.21580000  | 1.28070000   |
| 33   | 88.98050000  | 2.01260000   |
| 34   | 89.68900000  | 1.03770000   |
| 35   | 94.76530000  | 2.19870000   |
| 36   | 94.85250000  | 4.14440000   |
| 37   | 100.96990000 | 0.77110000   |
| 38   | 103.64340000 | 5.70560000   |
| 39   | 106.43050000 | 6.16660000   |
| 40   | 114.69040000 | 0.03750000   |
| 41   | 117.85060000 | 0.15690000   |
| 42   | 121.38960000 | 2.20550000   |
| 43   | 122.42700000 | 4.16260000   |
| 44   | 131.03490000 | 0.18840000   |
| 45   | 138.00770000 | 0.05760000   |
| 46   | 140.19680000 | 7.90660000   |
| 47   | 141.33570000 | 1.85570000   |
| 48   | 142.55570000 | 2.09460000   |

|    |              |             |
|----|--------------|-------------|
| 49 | 151.60010000 | 1.42090000  |
| 50 | 153.06380000 | 1.62790000  |
| 51 | 161.58510000 | 0.94850000  |
| 52 | 164.18850000 | 0.05190000  |
| 53 | 165.32230000 | 1.25830000  |
| 54 | 168.91300000 | 0.05180000  |
| 55 | 170.41070000 | 0.14850000  |
| 56 | 171.63400000 | 0.55050000  |
| 57 | 172.70660000 | 1.11970000  |
| 58 | 177.37900000 | 0.82460000  |
| 59 | 183.67080000 | 0.57770000  |
| 60 | 194.89400000 | 0.10590000  |
| 61 | 198.32490000 | 0.28180000  |
| 62 | 204.95690000 | 0.39740000  |
| 63 | 213.22940000 | 13.21080000 |
| 64 | 218.57420000 | 1.19260000  |
| 65 | 218.79760000 | 0.44230000  |
| 66 | 222.79840000 | 0.87160000  |
| 67 | 224.49690000 | 0.41170000  |
| 68 | 232.22990000 | 2.84980000  |
| 69 | 234.12220000 | 0.29430000  |
| 70 | 235.30820000 | 0.08790000  |
| 71 | 244.04060000 | 0.67860000  |
| 72 | 247.61580000 | 2.98710000  |
| 73 | 254.22750000 | 0.07160000  |
| 74 | 257.71700000 | 0.24130000  |
| 75 | 258.77730000 | 0.06800000  |
| 76 | 260.03890000 | 0.09820000  |
| 77 | 260.24270000 | 0.08610000  |
| 78 | 262.05670000 | 0.09910000  |
| 79 | 274.29650000 | 0.12980000  |
| 80 | 284.49110000 | 3.23860000  |
| 81 | 299.17290000 | 2.30050000  |
| 82 | 303.09620000 | 2.52270000  |
| 83 | 311.88860000 | 2.48350000  |
| 84 | 324.33480000 | 0.54040000  |
| 85 | 329.20960000 | 2.99220000  |
| 86 | 335.25620000 | 0.77640000  |
| 87 | 337.26220000 | 0.54120000  |
| 88 | 337.99730000 | 3.16530000  |
| 89 | 340.36020000 | 9.31140000  |
| 90 | 341.77840000 | 23.92900000 |
| 91 | 358.00940000 | 6.27480000  |
| 92 | 368.13610000 | 6.85750000  |
| 93 | 373.80060000 | 33.13790000 |
| 94 | 376.45810000 | 13.43540000 |
| 95 | 378.97810000 | 17.20530000 |
| 96 | 384.11840000 | 0.91310000  |
| 97 | 386.65040000 | 5.52170000  |
| 98 | 391.54900000 | 21.06670000 |
| 99 | 405.05990000 | 0.07400000  |

|     |              |             |
|-----|--------------|-------------|
| 100 | 409.76090000 | 6.00260000  |
| 101 | 411.42620000 | 13.56700000 |
| 102 | 412.21040000 | 98.04390000 |
| 103 | 414.62920000 | 16.61160000 |
| 104 | 418.65270000 | 0.59370000  |
| 105 | 421.55430000 | 2.61060000  |
| 106 | 423.51110000 | 0.62460000  |
| 107 | 433.57320000 | 6.20550000  |
| 108 | 447.13370000 | 2.27790000  |
| 109 | 452.15120000 | 5.95490000  |
| 110 | 454.00090000 | 12.52160000 |
| 111 | 455.65910000 | 0.68790000  |
| 112 | 462.82270000 | 0.45650000  |
| 113 | 464.78830000 | 0.61700000  |
| 114 | 485.33470000 | 7.91510000  |
| 115 | 498.13550000 | 78.05510000 |
| 116 | 505.13050000 | 46.40220000 |
| 117 | 516.02360000 | 17.24820000 |
| 118 | 521.15020000 | 20.87260000 |
| 119 | 524.04920000 | 13.86790000 |
| 120 | 532.88880000 | 1.01460000  |
| 121 | 549.47290000 | 7.20050000  |
| 122 | 551.90670000 | 0.42490000  |
| 123 | 552.37740000 | 14.85990000 |
| 124 | 569.78590000 | 9.90390000  |
| 125 | 578.89170000 | 1.79160000  |
| 126 | 579.46580000 | 0.38540000  |
| 127 | 587.78690000 | 6.02530000  |
| 128 | 596.90960000 | 16.36330000 |
| 129 | 612.73430000 | 1.26050000  |
| 130 | 615.41550000 | 4.50830000  |
| 131 | 635.24380000 | 1.30030000  |
| 132 | 642.82950000 | 5.50290000  |
| 133 | 665.30610000 | 12.28200000 |
| 134 | 686.93410000 | 1.46480000  |
| 135 | 691.51220000 | 16.72580000 |
| 136 | 693.42670000 | 9.89650000  |
| 137 | 694.18700000 | 12.09790000 |
| 138 | 702.21610000 | 3.26190000  |
| 139 | 704.29760000 | 2.84020000  |
| 140 | 715.83330000 | 2.49400000  |
| 141 | 720.27000000 | 28.01800000 |
| 142 | 721.61110000 | 16.11800000 |
| 143 | 724.39140000 | 22.39870000 |
| 144 | 726.85560000 | 15.92560000 |
| 145 | 739.42180000 | 0.74700000  |
| 146 | 742.05190000 | 7.56570000  |
| 147 | 749.68350000 | 0.00900000  |
| 148 | 754.78620000 | 25.12390000 |
| 149 | 755.77430000 | 1.04710000  |
| 150 | 756.17360000 | 1.18380000  |

|     |               |              |
|-----|---------------|--------------|
| 151 | 757.10510000  | 0.06840000   |
| 152 | 760.57860000  | 54.58880000  |
| 153 | 760.93230000  | 2.24090000   |
| 154 | 763.24810000  | 6.70920000   |
| 155 | 763.93250000  | 5.69750000   |
| 156 | 765.02220000  | 8.11030000   |
| 157 | 767.69710000  | 0.33710000   |
| 158 | 769.88980000  | 21.28220000  |
| 159 | 770.40880000  | 23.11490000  |
| 160 | 774.98580000  | 102.40280000 |
| 161 | 786.60700000  | 4.99140000   |
| 162 | 787.57440000  | 9.21870000   |
| 163 | 788.75350000  | 11.00220000  |
| 164 | 791.55300000  | 45.53500000  |
| 165 | 793.24270000  | 91.28220000  |
| 166 | 794.29230000  | 21.03590000  |
| 167 | 800.03430000  | 0.25090000   |
| 168 | 813.71720000  | 42.90520000  |
| 169 | 841.44210000  | 14.75560000  |
| 170 | 855.02190000  | 3.72450000   |
| 171 | 858.44470000  | 0.02690000   |
| 172 | 861.47110000  | 0.08770000   |
| 173 | 869.33760000  | 4.40810000   |
| 174 | 881.05620000  | 3.89630000   |
| 175 | 881.66940000  | 2.71860000   |
| 176 | 884.14100000  | 2.29760000   |
| 177 | 884.88830000  | 2.92010000   |
| 178 | 888.91230000  | 76.32610000  |
| 179 | 903.34790000  | 22.13160000  |
| 180 | 904.61850000  | 2.30360000   |
| 181 | 905.22450000  | 29.27060000  |
| 182 | 906.34160000  | 10.30400000  |
| 183 | 906.50380000  | 23.33070000  |
| 184 | 913.46110000  | 10.20780000  |
| 185 | 914.84550000  | 13.47310000  |
| 186 | 915.01310000  | 1.27150000   |
| 187 | 915.30450000  | 11.29160000  |
| 188 | 915.37590000  | 9.84170000   |
| 189 | 916.34560000  | 4.51660000   |
| 190 | 929.32890000  | 5.75630000   |
| 191 | 965.66670000  | 3.73410000   |
| 192 | 966.13830000  | 6.21310000   |
| 193 | 973.49630000  | 15.01340000  |
| 194 | 976.33340000  | 0.28280000   |
| 195 | 986.63220000  | 1.82760000   |
| 196 | 1007.15050000 | 0.14430000   |
| 197 | 1010.47800000 | 0.34150000   |
| 198 | 1010.65380000 | 0.07500000   |
| 199 | 1027.09740000 | 0.07110000   |
| 200 | 1028.58730000 | 6.19980000   |
| 201 | 1029.80730000 | 23.79720000  |

|     |               |              |
|-----|---------------|--------------|
| 202 | 1030.61220000 | 83.54470000  |
| 203 | 1036.45280000 | 2.46410000   |
| 204 | 1036.73950000 | 1.49760000   |
| 205 | 1047.86870000 | 28.59790000  |
| 206 | 1051.26160000 | 3.61800000   |
| 207 | 1051.56770000 | 3.65560000   |
| 208 | 1051.93340000 | 5.62490000   |
| 209 | 1053.51780000 | 5.96280000   |
| 210 | 1053.69920000 | 7.04910000   |
| 211 | 1054.59300000 | 0.87560000   |
| 212 | 1067.94630000 | 104.44440000 |
| 213 | 1073.05240000 | 8.03430000   |
| 214 | 1074.68890000 | 1.48730000   |
| 215 | 1075.76230000 | 14.42810000  |
| 216 | 1075.84810000 | 23.40930000  |
| 217 | 1075.89460000 | 23.45020000  |
| 218 | 1076.42440000 | 16.84710000  |
| 219 | 1078.48730000 | 4.54300000   |
| 220 | 1089.60940000 | 3.60580000   |
| 221 | 1089.73180000 | 2.01500000   |
| 222 | 1090.64730000 | 2.29200000   |
| 223 | 1090.88320000 | 1.37310000   |
| 224 | 1093.01400000 | 4.02830000   |
| 225 | 1093.78170000 | 0.94820000   |
| 226 | 1095.11240000 | 25.20910000  |
| 227 | 1096.02080000 | 1.74970000   |
| 228 | 1116.30880000 | 12.44100000  |
| 229 | 1116.84490000 | 8.84820000   |
| 230 | 1117.25250000 | 37.01200000  |
| 231 | 1117.73240000 | 25.44060000  |
| 232 | 1120.98230000 | 118.93080000 |
| 233 | 1124.02390000 | 4.19420000   |
| 234 | 1127.16010000 | 14.66650000  |
| 235 | 1141.68820000 | 0.97330000   |
| 236 | 1142.23070000 | 0.23060000   |
| 237 | 1151.33890000 | 15.34350000  |
| 238 | 1151.86990000 | 22.20400000  |
| 239 | 1158.48390000 | 11.69730000  |
| 240 | 1162.14840000 | 87.49700000  |
| 241 | 1170.79620000 | 5.08900000   |
| 242 | 1175.58190000 | 3.44020000   |
| 243 | 1186.58180000 | 9.09360000   |
| 244 | 1189.06630000 | 13.15700000  |
| 245 | 1205.19020000 | 198.66300000 |
| 246 | 1213.41040000 | 3.90010000   |
| 247 | 1214.57440000 | 2.34950000   |
| 248 | 1215.70170000 | 2.33280000   |
| 249 | 1216.68900000 | 2.20580000   |
| 250 | 1217.89400000 | 4.20260000   |
| 251 | 1218.34210000 | 7.81660000   |
| 252 | 1226.96800000 | 1.03830000   |



|     |               |              |
|-----|---------------|--------------|
| 253 | 1228.63180000 | 2.76650000   |
| 254 | 1228.77790000 | 42.36790000  |
| 255 | 1229.43160000 | 1.76410000   |
| 256 | 1231.60640000 | 0.47260000   |
| 257 | 1231.77970000 | 0.48280000   |
| 258 | 1247.83690000 | 31.63510000  |
| 259 | 1248.65280000 | 9.92780000   |
| 260 | 1251.89530000 | 124.75180000 |
| 261 | 1252.97540000 | 40.96300000  |
| 262 | 1261.18240000 | 42.52050000  |
| 263 | 1275.12640000 | 4.51180000   |
| 264 | 1289.45710000 | 37.14850000  |
| 265 | 1291.04820000 | 3.28990000   |
| 266 | 1292.09710000 | 2.62740000   |
| 267 | 1293.90100000 | 2.57450000   |
| 268 | 1295.71560000 | 1.68360000   |
| 269 | 1296.10980000 | 7.56380000   |
| 270 | 1298.44880000 | 9.42370000   |
| 271 | 1306.08490000 | 300.66840000 |
| 272 | 1307.31120000 | 1.71410000   |
| 273 | 1316.54780000 | 0.74290000   |
| 274 | 1317.10330000 | 2.48700000   |
| 275 | 1317.59570000 | 2.76340000   |
| 276 | 1320.02230000 | 1.30020000   |
| 277 | 1320.57860000 | 4.64350000   |
| 278 | 1321.15920000 | 1.03710000   |
| 279 | 1322.13390000 | 1.32600000   |
| 280 | 1324.41660000 | 0.70520000   |
| 281 | 1324.76970000 | 4.60490000   |
| 282 | 1325.80090000 | 2.74220000   |
| 283 | 1326.36080000 | 16.62790000  |
| 284 | 1328.77290000 | 14.14260000  |
| 285 | 1331.96540000 | 38.25300000  |
| 286 | 1334.71960000 | 332.44690000 |
| 287 | 1344.72770000 | 125.97920000 |
| 288 | 1347.04230000 | 673.45350000 |
| 289 | 1370.43400000 | 124.34670000 |
| 290 | 1375.32350000 | 99.71570000  |
| 291 | 1380.65430000 | 0.21650000   |
| 292 | 1381.39740000 | 0.42140000   |
| 293 | 1381.50070000 | 0.24680000   |
| 294 | 1381.94620000 | 0.18620000   |
| 295 | 1383.78190000 | 0.25120000   |
| 296 | 1384.04240000 | 0.45200000   |
| 297 | 1388.63640000 | 383.71640000 |
| 298 | 1392.07600000 | 108.31740000 |
| 299 | 1396.42930000 | 9.92190000   |
| 300 | 1398.20950000 | 1.06230000   |
| 301 | 1398.92660000 | 3.03960000   |
| 302 | 1398.98070000 | 1.08190000   |
| 303 | 1399.55020000 | 1.12350000   |

|     |               |              |
|-----|---------------|--------------|
| 304 | 1401.66060000 | 6.08850000   |
| 305 | 1402.02370000 | 12.04370000  |
| 306 | 1404.65950000 | 24.10860000  |
| 307 | 1409.17140000 | 99.29020000  |
| 308 | 1415.98450000 | 140.67850000 |
| 309 | 1420.03820000 | 31.51260000  |
| 310 | 1421.27900000 | 8.27430000   |
| 311 | 1421.38460000 | 24.51400000  |
| 312 | 1423.04980000 | 14.30600000  |
| 313 | 1426.16520000 | 24.09680000  |
| 314 | 1428.95440000 | 31.83370000  |
| 315 | 1443.06000000 | 158.53820000 |
| 316 | 1444.03460000 | 40.47610000  |
| 317 | 1447.13760000 | 1.90000000   |
| 318 | 1447.68600000 | 2.42690000   |
| 319 | 1449.28870000 | 1.79040000   |
| 320 | 1449.89980000 | 1.32030000   |
| 321 | 1450.88040000 | 2.22250000   |
| 322 | 1451.78320000 | 2.52630000   |
| 323 | 1454.61570000 | 32.79680000  |
| 324 | 1455.36910000 | 17.33170000  |
| 325 | 1456.78880000 | 8.83010000   |
| 326 | 1457.32340000 | 17.03330000  |
| 327 | 1458.07290000 | 10.72860000  |
| 328 | 1458.72010000 | 9.24200000   |
| 329 | 1458.94450000 | 9.43130000   |
| 330 | 1459.11340000 | 9.97320000   |
| 331 | 1459.31760000 | 7.78030000   |
| 332 | 1459.88900000 | 1.03670000   |
| 333 | 1460.30160000 | 2.37260000   |
| 334 | 1462.30800000 | 24.11610000  |
| 335 | 1465.31050000 | 0.24440000   |
| 336 | 1465.71790000 | 0.52080000   |
| 337 | 1466.10550000 | 10.57560000  |
| 338 | 1466.59280000 | 7.26020000   |
| 339 | 1466.66970000 | 60.47100000  |
| 340 | 1473.41560000 | 5.00040000   |
| 341 | 1473.91610000 | 6.23250000   |
| 342 | 1476.41190000 | 23.85070000  |
| 343 | 1476.76880000 | 182.44860000 |
| 344 | 1477.38910000 | 14.14090000  |
| 345 | 1478.14850000 | 14.36620000  |
| 346 | 1478.68880000 | 22.34750000  |
| 347 | 1484.36260000 | 24.76120000  |
| 348 | 1485.13500000 | 23.85080000  |
| 349 | 1489.87470000 | 348.65640000 |
| 350 | 1501.79440000 | 337.73530000 |
| 351 | 1514.32900000 | 701.52370000 |
| 352 | 1520.60620000 | 279.87250000 |
| 353 | 1543.10680000 | 70.29300000  |
| 354 | 1549.27090000 | 89.88660000  |

|     |               |               |
|-----|---------------|---------------|
| 355 | 1570.17170000 | 31.27910000   |
| 356 | 1629.97560000 | 12.72280000   |
| 357 | 1638.27010000 | 507.80720000  |
| 358 | 1644.20330000 | 0.39220000    |
| 359 | 1656.51730000 | 66.46620000   |
| 360 | 1661.18660000 | 0.49800000    |
| 361 | 1676.95770000 | 100.21800000  |
| 362 | 1683.06770000 | 71.81200000   |
| 363 | 1691.95260000 | 37.30580000   |
| 364 | 1699.22710000 | 172.15480000  |
| 365 | 1768.01350000 | 1104.55360000 |
| 366 | 1779.77070000 | 503.38990000  |
| 367 | 1809.86330000 | 660.22000000  |
| 368 | 1825.41160000 | 389.48920000  |
| 369 | 2172.60980000 | 3048.98410000 |
| 370 | 2210.26780000 | 35.46700000   |
| 371 | 3043.77570000 | 36.65380000   |
| 372 | 3044.29090000 | 33.19680000   |
| 373 | 3044.84980000 | 33.57080000   |
| 374 | 3045.13690000 | 29.49470000   |
| 375 | 3045.21080000 | 31.16540000   |
| 376 | 3046.09400000 | 37.20160000   |
| 377 | 3047.98340000 | 26.29500000   |
| 378 | 3048.48400000 | 11.36030000   |
| 379 | 3048.49320000 | 27.97960000   |
| 380 | 3048.56240000 | 48.73530000   |
| 381 | 3048.73190000 | 37.50890000   |
| 382 | 3048.84830000 | 11.74900000   |
| 383 | 3057.63930000 | 43.06430000   |
| 384 | 3058.50590000 | 14.07300000   |
| 385 | 3058.56550000 | 23.21850000   |
| 386 | 3059.11380000 | 42.33880000   |
| 387 | 3059.54190000 | 32.07160000   |
| 388 | 3059.99340000 | 35.96020000   |
| 389 | 3065.14940000 | 28.41970000   |
| 390 | 3066.00190000 | 35.23240000   |
| 391 | 3066.01270000 | 35.91610000   |
| 392 | 3066.85090000 | 31.90300000   |
| 393 | 3067.04770000 | 33.47040000   |
| 394 | 3067.14500000 | 25.67110000   |
| 395 | 3071.97600000 | 19.34020000   |
| 396 | 3085.88180000 | 28.02390000   |
| 397 | 3087.44740000 | 28.48880000   |
| 398 | 3088.79690000 | 16.67760000   |
| 399 | 3089.21730000 | 15.03270000   |
| 400 | 3089.67000000 | 10.98950000   |
| 401 | 3090.14910000 | 11.31590000   |
| 402 | 3090.89060000 | 7.78460000    |
| 403 | 3094.57970000 | 2.94150000    |
| 404 | 3114.47160000 | 5.88530000    |
| 405 | 3114.72770000 | 7.11860000    |

|     |               |             |
|-----|---------------|-------------|
| 406 | 3114.94030000 | 7.94450000  |
| 407 | 3115.47950000 | 41.74680000 |
| 408 | 3118.16480000 | 22.38030000 |
| 409 | 3118.83220000 | 16.59820000 |
| 410 | 3119.41360000 | 17.96990000 |
| 411 | 3130.24990000 | 17.34880000 |
| 412 | 3130.49020000 | 18.82050000 |
| 413 | 3132.91900000 | 15.22580000 |
| 414 | 3135.33610000 | 1.47260000  |
| 415 | 3136.54350000 | 0.59260000  |
| 416 | 3137.30130000 | 44.33410000 |
| 417 | 3137.34580000 | 21.03510000 |
| 418 | 3138.67170000 | 56.54030000 |
| 419 | 3138.81190000 | 57.92310000 |
| 420 | 3138.95980000 | 62.60470000 |
| 421 | 3138.98870000 | 52.05330000 |
| 422 | 3139.03140000 | 70.62360000 |
| 423 | 3145.60750000 | 34.64500000 |
| 424 | 3146.99520000 | 33.95890000 |
| 425 | 3147.30520000 | 35.09230000 |
| 426 | 3147.47180000 | 27.68990000 |
| 427 | 3147.51720000 | 37.53000000 |
| 428 | 3147.67930000 | 30.61250000 |
| 429 | 3178.43080000 | 8.43120000  |
| 430 | 3179.23630000 | 7.55290000  |
| 431 | 3194.91480000 | 16.14570000 |
| 432 | 3209.17080000 | 9.27600000  |
| 433 | 3209.71200000 | 0.35770000  |
| 434 | 3209.83090000 | 0.85710000  |
| 435 | 3217.65540000 | 4.80400000  |
| 436 | 3217.78170000 | 6.14890000  |
| 437 | 3219.74940000 | 14.91230000 |
| 438 | 3224.08710000 | 4.22430000  |
| 439 | 3232.78290000 | 21.32760000 |
| 440 | 3232.92460000 | 5.13870000  |
| 441 | 3234.50920000 | 2.05580000  |
| 442 | 3235.83120000 | 2.54720000  |
| 443 | 3238.03780000 | 1.38660000  |
| 444 | 3241.53280000 | 2.59760000  |
| 445 | 3244.19170000 | 1.61680000  |
| 446 | 3246.88920000 | 0.91270000  |
| 447 | 3248.90040000 | 0.79040000  |

## 6: PTZ-CH<sub>2</sub>-Ph-CC-Pt-CC-NDI in CH<sub>2</sub>Cl<sub>2</sub>, TRIPLET

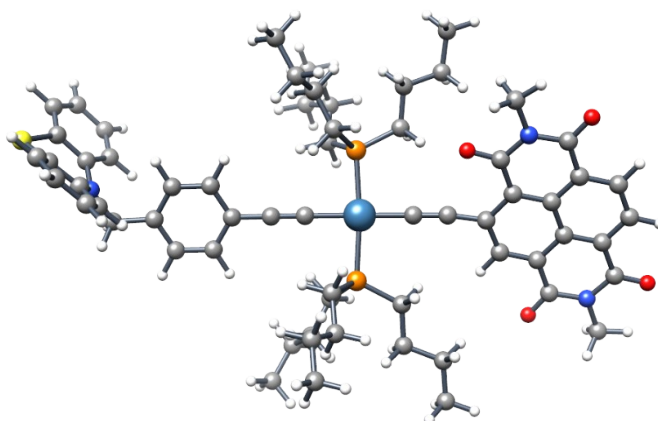

Optimised triplet ground state geometry of PTZ-CH<sub>2</sub>-Ph-CC-Pt-CC-NDI, PTZ group puckerred.

Route : #p opt freq PBE1PBE/genecp  
: scrf=(cpcm,solvent=dichloromethane) geom=connectivity  
: int=acc2e=13 scf=noincfock  
SMILES : CCCC[P](CCCC)(CCCC)[Pt]  
: (C#Cc1ccc(cc1)CN2c3ccccc3Sc4c2cccc4)  
: (C#Cc5cc6c7c(ccc8c7c5C(=O)N(C8=O)C)  
: C(=O)N(C6=O)C)[P](CCCC)(CCCC)CCCC  
Formula : C<sub>63</sub>H<sub>77</sub>N<sub>3</sub>O<sub>4</sub>P<sub>2</sub>PtS<sup>3</sup>  
Charge : 0  
Multiplicity : 3  
Dipole : 50.5373 Debye  
Energy : -4106.51453695 a.u.  
Gibbs Energy : -4105.37663300 a.u.  
Number of imaginary frequencies : 0

Cartesian Co-ordinates (XYZ format)

151

|    |             |             |             |
|----|-------------|-------------|-------------|
| Pt | 0.66355300  | -0.20258600 | -0.33628601 |
| C  | -1.29860306 | -0.52213901 | -0.38247001 |
| P  | 0.90930200  | -2.54487610 | -0.09127900 |
| P  | 0.18364200  | 2.09471202  | -0.59590203 |
| C  | -2.51704311 | -0.73401803 | -0.39062500 |
| C  | -3.91734695 | -0.98296201 | -0.40762499 |
| C  | -4.83838511 | 0.02075100  | -0.04715700 |
| C  | -4.42453003 | -2.24599504 | -0.78378302 |

|   |             |             |             |             |             |
|---|-------------|-------------|-------------|-------------|-------------|
|   |             | C           | -6.20573616 | -0.23009600 | -0.05912800 |
|   |             | H           | -4.46667814 | 1.00408995  | 0.24898800  |
|   |             | C           | -5.79093218 | -2.48397589 | -0.79912001 |
|   |             | H           | -3.72742295 | -3.03866005 | -1.06439197 |
|   |             | C           | -6.70307493 | -1.48194003 | -0.43687901 |
| H | -6.89968491 | 0.56152397  | 0.23277500  |             |             |
| H | -6.16087389 | -3.47025204 | -1.09410596 |             |             |
| C | 0.07653000  | -3.39815092 | -1.49394798 |             |             |
| H | -0.76841599 | -2.74205089 | -1.75582802 |             |             |
| H | 0.78736198  | -3.33376288 | -2.33659911 |             |             |
| C | 2.65189099  | -3.12491608 | -0.03955100 |             |             |
| H | 3.04054403  | -2.80787110 | 0.94388402  |             |             |
| H | 3.17489100  | -2.49394608 | -0.77506799 |             |             |
| C | 0.08778500  | -3.02779293 | 1.48430705  |             |             |
| H | 0.33820400  | -2.21634698 | 2.18811703  |             |             |
| H | -0.99255800 | -2.92181706 | 1.28611195  |             |             |
| C | 1.66441298  | 3.15423203  | -0.81848198 |             |             |
| H | 2.01388001  | 2.95052099  | -1.84635901 |             |             |
| H | 2.43000507  | 2.72946501  | -0.14841799 |             |             |
| C | -0.88637400 | 2.29324007  | -2.08208203 |             |             |
| H | -0.46964300 | 1.58678901  | -2.81977892 |             |             |
| H | -1.86420000 | 1.87208605  | -1.79385102 |             |             |
| C | -0.73461002 | 2.67606306  | 0.88941503  |             |             |
| H | -1.33669400 | 1.80776298  | 1.20156801  |             |             |
| H | 0.03443300  | 2.80951405  | 1.67049396  |             |             |
| C | -1.03735399 | 3.66888595  | -2.72208309 |             |             |
| H | -0.04836200 | 4.04603577  | -3.03262711 |             |             |
| H | -1.43102801 | 4.39757490  | -1.99529397 |             |             |
| C | -1.95715904 | 3.63298512  | -3.93927693 |             |             |
| H | -2.94735694 | 3.25268888  | -3.63229299 |             |             |
| H | -1.56545496 | 2.89950204  | -4.66590595 |             |             |
| C | -2.11325598 | 4.98881721  | -4.61003304 |             |             |
| H | -2.78168297 | 4.93194389  | -5.48254824 |             |             |
| H | -2.53534293 | 5.73257780  | -3.91497993 |             |             |
| H | -1.14261305 | 5.37702990  | -4.95869303 |             |             |
| C | 1.54976296  | 4.65498686  | -0.56428099 |             |             |
| H | 0.73877198  | 5.10488701  | -1.15895605 |             |             |
| H | 1.28972197  | 4.82745600  | 0.49424800  |             |             |
| C | 2.85597992  | 5.38011312  | -0.87455499 |             |             |
| H | 3.10737610  | 5.22975779  | -1.93927300 |             |             |
| H | 3.66951895  | 4.90401793  | -0.30120799 |             |             |
| C | 2.80455208  | 6.86761093  | -0.56299800 |             |             |
| H | 3.75790095  | 7.36288118  | -0.80258799 |             |             |
| H | 2.01322007  | 7.37219095  | -1.14086902 |             |             |
| H | 2.59679389  | 7.04487991  | 0.50483602  |             |             |
| C | -1.63084197 | 3.90642500  | 0.78482401  |             |             |
| H | -1.05714703 | 4.78233910  | 0.44239801  |             |             |
| H | -2.41136694 | 3.73025298  | 0.02498800  |             |             |
| C | -2.30263996 | 4.23759508  | 2.11429596  |             |             |
| H | -2.87347388 | 3.35734701  | 2.45918107  |             |             |
| H | -1.52437699 | 4.40965223  | 2.87854910  |             |             |

|   |             |             |             |
|---|-------------|-------------|-------------|
| C | -3.22076988 | 5.44718122  | 2.03561592  |
| H | -4.03129816 | 5.28837919  | 1.30601001  |
| H | -3.68726110 | 5.66211081  | 3.00901389  |
| H | -2.66895795 | 6.34889507  | 1.72458899  |
| C | 0.40824199  | -4.37588978 | 2.12065411  |
| H | 1.48694503  | -4.43479681 | 2.34393191  |
| H | 0.19135600  | -5.19866991 | 1.42071795  |
| C | -0.37577999 | -4.59982300 | 3.41048694  |
| H | -0.16599301 | -3.77089190 | 4.10920095  |
| H | -1.45633197 | -4.54183722 | 3.19054103  |
| C | -0.05776400 | -5.92827702 | 4.07874012  |
| H | -0.28919399 | -6.77623987 | 3.41406608  |
| H | 1.00986898  | -5.99783278 | 4.34259892  |
| H | -0.63856000 | -6.06263494 | 5.00387096  |
| C | 2.96133089  | -4.59472799 | -0.30789900 |
| H | 2.39641905  | -5.24764109 | 0.37632999  |
| H | 2.63453293  | -4.86014414 | -1.32770395 |
| C | 4.45024920  | -4.90052319 | -0.16789401 |
| H | 5.03081083  | -4.24076986 | -0.83586502 |
| H | 4.77324390  | -4.64547205 | 0.85704303  |
| C | 4.79036283  | -6.35291815 | -0.46402600 |
| H | 5.86830711  | -6.54312086 | -0.34921399 |
| H | 4.25656319  | -7.03756094 | 0.21495400  |
| H | 4.51290321  | -6.62732697 | -1.49470103 |
| C | -0.42517099 | -4.82707691 | -1.30744600 |
| H | -1.16832900 | -4.85227585 | -0.49210599 |
| H | 0.39450601  | -5.49560308 | -0.99965900 |
| C | -1.06684303 | -5.37705612 | -2.57780790 |
| H | -1.88431394 | -4.70330906 | -2.89037895 |
| H | -0.32621199 | -5.35071707 | -3.39638710 |
| C | -1.60069501 | -6.79150105 | -2.41376996 |
| H | -0.79738301 | -7.49281406 | -2.13594699 |
| H | -2.36880493 | -6.84060287 | -1.62505996 |
| H | -2.05635095 | -7.16017580 | -3.34531403 |
| C | 2.58818889  | 0.09544000  | -0.21024400 |
| C | 3.81237793  | 0.28739500  | -0.03711400 |
| C | 5.20807123  | 0.32106701  | 0.07717100  |
| C | 5.95223808  | 1.38073695  | 0.74213099  |
| C | 5.92239809  | -0.74621600 | -0.49569201 |
| C | 7.36374807  | 1.31935203  | 0.77144200  |
| C | 5.27441883  | 2.49281001  | 1.40878296  |
| C | 7.30909586  | -0.81068498 | -0.47038200 |
| H | 5.37652588  | -1.54878795 | -0.99270701 |
| C | 8.12787628  | 2.33202291  | 1.40441298  |
| C | 8.05644989  | 0.22392400  | 0.15818000  |
| O | 4.05603123  | 2.62052202  | 1.45647001  |
| N | 6.07388115  | 3.45805502  | 2.02278996  |
| C | 7.99667120  | -1.94111800 | -1.08902097 |
| C | 7.46636820  | 3.46228600  | 2.05759096  |
| C | 9.53241158  | 2.26478601  | 1.41839099  |
| C | 9.45647812  | 0.17613700  | 0.18952300  |

|   |              |             |             |
|---|--------------|-------------|-------------|
| C | 5.36809015   | 4.54360008  | 2.68059206  |
| O | 7.41738415   | -2.86967611 | -1.64040697 |
| N | 9.39022541   | -1.93273902 | -1.02907395 |
| O | 8.08361435   | 4.36209679  | 2.61149311  |
| C | 10.18902206  | 1.20637202  | 0.82126302  |
| H | 10.08054638  | 3.06738210  | 1.91413999  |
| C | 10.17425823  | -0.94278902 | -0.42948800 |
| H | 4.83533287   | 5.16182804  | 1.94333994  |
| H | 4.62877607   | 4.13862181  | 3.38384891  |
| H | 6.10824108   | 5.15247011  | 3.20769000  |
| C | 10.06062603  | -3.06225204 | -1.64729404 |
| H | 11.27818298  | 1.13789201  | 0.82495701  |
| O | 11.39506626  | -1.02244794 | -0.42846400 |
| H | 9.80641174   | -3.11751390 | -2.71504307 |
| H | 11.13823509  | -2.92364693 | -1.52140403 |
| H | 9.73944378   | -4.00023317 | -1.17323196 |
| C | -8.18557453  | -1.79583395 | -0.46911401 |
| H | -8.36692524  | -2.71943903 | 0.10419900  |
| H | -8.47998714  | -2.03447890 | -1.50414097 |
| N | -9.08964920  | -0.78104901 | 0.02535200  |
| C | -9.53220367  | 0.21987200  | -0.85506803 |
| C | -9.31595993  | -0.70084602 | 1.40948200  |
| C | -10.68016148 | 0.98456699  | -0.56576002 |
| C | -8.85495186  | 0.49195901  | -2.05477905 |
| C | -10.44141102 | -0.02581700 | 1.92331302  |
| C | -8.43860054  | -1.29702795 | 2.32963991  |
| C | -11.10548210 | 1.99374199  | -1.42898905 |
| S | -11.68607235 | 0.58586502  | 0.82993299  |
| C | -9.30811405  | 1.47616994  | -2.93314195 |
| H | -7.95272303  | -0.06379000 | -2.31130409 |
| C | -10.65188408 | 0.07274300  | 3.29828000  |
| C | -8.67636490  | -1.22936499 | 3.70238400  |
| H | -7.54825115  | -1.81753004 | 1.97667098  |
| C | -10.42993832 | 2.23897505  | -2.62379694 |
| H | -11.99260426 | 2.57513094  | -1.16502404 |
| H | -8.76049995  | 1.65045702  | -3.86221790 |
| H | -11.52830982 | 0.61599600  | 3.66070509  |
| C | -9.77756119  | -0.53758699 | 4.19693518  |
| H | -7.97677279  | -1.71559203 | 4.38619900  |
| H | -10.78175545 | 3.01875210  | -3.30236006 |
| H | -9.96133137  | -0.47121301 | 5.27123117  |



## Frequencies

| Mode | IR frequency | IR intensity |
|------|--------------|--------------|
| 1    | 3.82050000   | 0.69640000   |
| 2    | 6.09540000   | 0.34210000   |
| 3    | 7.65960000   | 0.76480000   |
| 4    | 10.78520000  | 0.09120000   |
| 5    | 12.24600000  | 0.18920000   |
| 6    | 14.37080000  | 0.17520000   |
| 7    | 15.50700000  | 0.04770000   |
| 8    | 18.86190000  | 0.35740000   |
| 9    | 24.70120000  | 0.17290000   |
| 10   | 26.06370000  | 0.09790000   |
| 11   | 28.56090000  | 0.05140000   |
| 12   | 36.06320000  | 0.44120000   |
| 13   | 40.07940000  | 0.80520000   |
| 14   | 40.35230000  | 2.01000000   |
| 15   | 40.95790000  | 0.06810000   |
| 16   | 42.89180000  | 2.31230000   |
| 17   | 43.97530000  | 0.20440000   |
| 18   | 46.08320000  | 0.45430000   |
| 19   | 52.00870000  | 0.12310000   |
| 20   | 52.65730000  | 0.97080000   |
| 21   | 55.06840000  | 0.06830000   |
| 22   | 56.32970000  | 0.57590000   |
| 23   | 61.15410000  | 0.34810000   |
| 24   | 61.51780000  | 0.05290000   |
| 25   | 64.17480000  | 1.24700000   |
| 26   | 66.53080000  | 0.97160000   |
| 27   | 71.41720000  | 0.19980000   |
| 28   | 73.37370000  | 0.11350000   |
| 29   | 75.10850000  | 1.65160000   |
| 30   | 78.77750000  | 0.34620000   |
| 31   | 80.78180000  | 0.22630000   |
| 32   | 83.55260000  | 0.74800000   |
| 33   | 90.36010000  | 0.27790000   |
| 34   | 90.40830000  | 0.15000000   |
| 35   | 94.69730000  | 32.66760000  |
| 36   | 97.34540000  | 0.11380000   |
| 37   | 99.81260000  | 2.91660000   |
| 38   | 102.68850000 | 6.31790000   |
| 39   | 109.54410000 | 6.76530000   |
| 40   | 116.13720000 | 0.41880000   |
| 41   | 116.64260000 | 0.37180000   |
| 42   | 121.63260000 | 0.64280000   |
| 43   | 124.49850000 | 5.05530000   |
| 44   | 132.18350000 | 19.66910000  |
| 45   | 137.73780000 | 1.31510000   |
| 46   | 140.53950000 | 1.47490000   |
| 47   | 142.16980000 | 13.14190000  |
| 48   | 143.66570000 | 2.39900000   |

|    |              |              |
|----|--------------|--------------|
| 49 | 149.84540000 | 1.85510000   |
| 50 | 153.49920000 | 1.45330000   |
| 51 | 161.21490000 | 1.62890000   |
| 52 | 162.89370000 | 2.76660000   |
| 53 | 163.67200000 | 0.70690000   |
| 54 | 167.38410000 | 18.00220000  |
| 55 | 168.77750000 | 5.40360000   |
| 56 | 172.02310000 | 4.88550000   |
| 57 | 173.29830000 | 2.40300000   |
| 58 | 176.06970000 | 4.88050000   |
| 59 | 183.46760000 | 31.01710000  |
| 60 | 192.09880000 | 3.99510000   |
| 61 | 197.23760000 | 13.43490000  |
| 62 | 205.08270000 | 2.94150000   |
| 63 | 211.41330000 | 69.33400000  |
| 64 | 216.64670000 | 3.41080000   |
| 65 | 217.58070000 | 0.34740000   |
| 66 | 222.08450000 | 0.39480000   |
| 67 | 225.96770000 | 0.33590000   |
| 68 | 230.64700000 | 229.90240000 |
| 69 | 234.26170000 | 0.24740000   |
| 70 | 235.40210000 | 0.05040000   |
| 71 | 240.45250000 | 6.20560000   |
| 72 | 245.38890000 | 2.38230000   |
| 73 | 254.09380000 | 0.21860000   |
| 74 | 258.35320000 | 0.39330000   |
| 75 | 259.98490000 | 0.05580000   |
| 76 | 260.14010000 | 0.11640000   |
| 77 | 260.68430000 | 0.04930000   |
| 78 | 261.63950000 | 0.10060000   |
| 79 | 282.44610000 | 0.70250000   |
| 80 | 285.57310000 | 7.20690000   |
| 81 | 298.52920000 | 28.84010000  |
| 82 | 303.02650000 | 11.16440000  |
| 83 | 305.69230000 | 0.92650000   |
| 84 | 314.50770000 | 1.37610000   |
| 85 | 329.54100000 | 123.86020000 |
| 86 | 336.06690000 | 0.55960000   |
| 87 | 337.43510000 | 0.62480000   |
| 88 | 340.01560000 | 43.39900000  |
| 89 | 340.96750000 | 7.92130000   |
| 90 | 344.14670000 | 14.89660000  |
| 91 | 351.72220000 | 13.12630000  |
| 92 | 364.52260000 | 77.31480000  |
| 93 | 372.51740000 | 3.38790000   |
| 94 | 375.92950000 | 71.19720000  |
| 95 | 378.01130000 | 17.31010000  |
| 96 | 383.26060000 | 86.57130000  |
| 97 | 387.37210000 | 39.23350000  |
| 98 | 389.36530000 | 109.84860000 |
| 99 | 405.47650000 | 2.15690000   |

|     |              |              |
|-----|--------------|--------------|
| 100 | 410.76210000 | 40.73060000  |
| 101 | 411.40130000 | 24.24600000  |
| 102 | 411.92970000 | 49.53440000  |
| 103 | 414.39540000 | 15.64960000  |
| 104 | 415.31760000 | 17.93980000  |
| 105 | 421.46400000 | 72.83800000  |
| 106 | 423.08540000 | 3.88270000   |
| 107 | 428.89330000 | 84.93700000  |
| 108 | 441.86700000 | 39.55920000  |
| 109 | 450.94130000 | 3.75300000   |
| 110 | 453.60800000 | 4.01490000   |
| 111 | 461.50500000 | 4.37640000   |
| 112 | 461.72480000 | 85.27300000  |
| 113 | 467.23050000 | 4.73230000   |
| 114 | 484.98130000 | 18.10040000  |
| 115 | 504.13970000 | 92.25170000  |
| 116 | 507.83180000 | 36.66370000  |
| 117 | 516.58160000 | 12.30630000  |
| 118 | 520.01660000 | 349.15330000 |
| 119 | 524.07320000 | 50.72300000  |
| 120 | 535.77260000 | 5.62690000   |
| 121 | 548.70030000 | 21.93750000  |
| 122 | 552.38240000 | 0.10520000   |
| 123 | 555.64560000 | 5.12600000   |
| 124 | 565.21040000 | 11.55540000  |
| 125 | 577.28770000 | 13.14050000  |
| 126 | 580.34990000 | 0.37520000   |
| 127 | 586.62600000 | 122.18630000 |
| 128 | 592.76910000 | 29.38280000  |
| 129 | 607.35900000 | 268.51460000 |
| 130 | 616.09470000 | 4.89930000   |
| 131 | 630.68890000 | 272.24730000 |
| 132 | 641.19250000 | 8.12020000   |
| 133 | 661.71710000 | 12.15990000  |
| 134 | 665.21910000 | 15.75560000  |
| 135 | 692.56500000 | 35.33140000  |
| 136 | 693.67780000 | 11.93550000  |
| 137 | 694.75830000 | 24.47680000  |
| 138 | 702.27660000 | 6.49420000   |
| 139 | 704.90800000 | 20.35980000  |
| 140 | 715.86880000 | 2.33750000   |
| 141 | 720.97710000 | 14.56920000  |
| 142 | 723.58560000 | 19.57480000  |
| 143 | 725.07340000 | 18.88200000  |
| 144 | 728.76630000 | 16.09420000  |
| 145 | 737.85970000 | 4.17880000   |
| 146 | 740.93120000 | 2.07740000   |
| 147 | 743.42660000 | 3.42040000   |
| 148 | 755.13150000 | 19.16510000  |
| 149 | 756.47460000 | 9.78800000   |
| 150 | 756.85520000 | 8.04230000   |

|     |               |               |
|-----|---------------|---------------|
| 151 | 756.98820000  | 16.18860000   |
| 152 | 757.32060000  | 4.63850000    |
| 153 | 760.77120000  | 301.97610000  |
| 154 | 763.66950000  | 7.47100000    |
| 155 | 764.56340000  | 0.36290000    |
| 156 | 765.38100000  | 4.36540000    |
| 157 | 765.68090000  | 8.53360000    |
| 158 | 768.18380000  | 35.12220000   |
| 159 | 770.38990000  | 22.82340000   |
| 160 | 775.63360000  | 58.23960000   |
| 161 | 779.25430000  | 4.52540000    |
| 162 | 788.06710000  | 76.61560000   |
| 163 | 789.84390000  | 5.90630000    |
| 164 | 792.45700000  | 46.58430000   |
| 165 | 793.10400000  | 0.96830000    |
| 166 | 794.44670000  | 27.37750000   |
| 167 | 799.52790000  | 24.71770000   |
| 168 | 800.28720000  | 30.87540000   |
| 169 | 840.59430000  | 18.78500000   |
| 170 | 851.62720000  | 5.90890000    |
| 171 | 853.26840000  | 1230.72000000 |
| 172 | 860.51970000  | 4.36400000    |
| 173 | 863.52310000  | 275.43920000  |
| 174 | 871.23260000  | 6.23470000    |
| 175 | 880.98010000  | 21.40510000   |
| 176 | 881.25170000  | 10.10400000   |
| 177 | 885.09830000  | 5.75100000    |
| 178 | 887.07220000  | 5.53210000    |
| 179 | 889.17110000  | 75.94450000   |
| 180 | 904.59930000  | 3.15370000    |
| 181 | 905.21080000  | 13.74990000   |
| 182 | 906.27430000  | 0.67120000    |
| 183 | 906.72160000  | 19.29090000   |
| 184 | 915.28440000  | 10.33420000   |
| 185 | 915.49200000  | 27.44010000   |
| 186 | 915.78410000  | 1.50800000    |
| 187 | 916.54320000  | 31.76680000   |
| 188 | 918.23880000  | 0.61690000    |
| 189 | 919.65150000  | 110.25320000  |
| 190 | 920.35800000  | 760.35580000  |
| 191 | 946.44460000  | 12.98900000   |
| 192 | 966.09670000  | 3.48010000    |
| 193 | 966.25380000  | 19.71360000   |
| 194 | 969.60530000  | 182.83220000  |
| 195 | 990.70860000  | 2.92970000    |
| 196 | 1010.24740000 | 2.33180000    |
| 197 | 1011.59420000 | 3.22000000    |
| 198 | 1011.77230000 | 0.10140000    |
| 199 | 1013.25610000 | 0.19540000    |
| 200 | 1027.50640000 | 148.97380000  |
| 201 | 1028.47250000 | 49.73380000   |

|     |               |               |
|-----|---------------|---------------|
| 202 | 1029.38780000 | 95.52510000   |
| 203 | 1037.92300000 | 7.88310000    |
| 204 | 1038.74750000 | 22.04030000   |
| 205 | 1042.29790000 | 601.45080000  |
| 206 | 1052.28230000 | 6.42150000    |
| 207 | 1052.44870000 | 4.56010000    |
| 208 | 1053.51970000 | 6.33560000    |
| 209 | 1054.28630000 | 3.29630000    |
| 210 | 1054.48240000 | 0.95460000    |
| 211 | 1054.86500000 | 1.66410000    |
| 212 | 1060.35130000 | 184.17750000  |
| 213 | 1074.50410000 | 3.81350000    |
| 214 | 1075.93890000 | 2.97290000    |
| 215 | 1076.20530000 | 2.84480000    |
| 216 | 1076.63910000 | 52.24340000   |
| 217 | 1076.70220000 | 26.34140000   |
| 218 | 1079.47670000 | 20.52620000   |
| 219 | 1080.46130000 | 3.94650000    |
| 220 | 1087.10940000 | 116.89250000  |
| 221 | 1089.66390000 | 5.63180000    |
| 222 | 1089.71470000 | 2.81320000    |
| 223 | 1090.36340000 | 1.00250000    |
| 224 | 1090.91700000 | 0.42820000    |
| 225 | 1092.78410000 | 4.15820000    |
| 226 | 1094.43240000 | 3.06830000    |
| 227 | 1096.66230000 | 4.18330000    |
| 228 | 1116.61880000 | 3.06920000    |
| 229 | 1117.10460000 | 1.72940000    |
| 230 | 1117.38340000 | 44.27280000   |
| 231 | 1117.65150000 | 18.64950000   |
| 232 | 1120.99190000 | 120.80110000  |
| 233 | 1123.52650000 | 213.75680000  |
| 234 | 1128.86820000 | 16.24060000   |
| 235 | 1140.54370000 | 1.70920000    |
| 236 | 1142.18970000 | 0.29260000    |
| 237 | 1152.11720000 | 122.45040000  |
| 238 | 1152.73230000 | 22.12670000   |
| 239 | 1156.67090000 | 0.24690000    |
| 240 | 1159.01480000 | 40.03200000   |
| 241 | 1172.63100000 | 5.22220000    |
| 242 | 1177.05070000 | 265.24080000  |
| 243 | 1177.74360000 | 1949.92050000 |
| 244 | 1184.66370000 | 150.38600000  |
| 245 | 1212.85520000 | 170.72880000  |
| 246 | 1213.76090000 | 0.06620000    |
| 247 | 1215.53030000 | 6.63200000    |
| 248 | 1216.05630000 | 5.09820000    |
| 249 | 1217.63720000 | 11.94900000   |
| 250 | 1218.70560000 | 5.86100000    |
| 251 | 1219.31610000 | 1.85440000    |
| 252 | 1226.04280000 | 135.92120000  |

|     |               |               |
|-----|---------------|---------------|
| 253 | 1227.95920000 | 72.31270000   |
| 254 | 1229.56550000 | 7.01440000    |
| 255 | 1231.33850000 | 2.43140000    |
| 256 | 1232.48020000 | 0.19230000    |
| 257 | 1234.17420000 | 4.84150000    |
| 258 | 1249.45550000 | 225.06460000  |
| 259 | 1250.90400000 | 204.04610000  |
| 260 | 1251.07940000 | 125.55970000  |
| 261 | 1256.07810000 | 209.80110000  |
| 262 | 1266.30060000 | 1278.71850000 |
| 263 | 1268.23780000 | 3805.64620000 |
| 264 | 1276.44440000 | 3.71210000    |
| 265 | 1291.52260000 | 1.97150000    |
| 266 | 1291.81740000 | 53.57930000   |
| 267 | 1292.26560000 | 2.39880000    |
| 268 | 1294.41710000 | 2.72350000    |
| 269 | 1296.47900000 | 23.45520000   |
| 270 | 1296.94770000 | 12.75000000   |
| 271 | 1300.09010000 | 5.33280000    |
| 272 | 1307.13480000 | 43.42510000   |
| 273 | 1314.13020000 | 1172.33980000 |
| 274 | 1318.13320000 | 4.21270000    |
| 275 | 1319.46410000 | 12.58490000   |
| 276 | 1320.54570000 | 15.50230000   |
| 277 | 1320.67280000 | 12.66990000   |
| 278 | 1322.83750000 | 610.06110000  |
| 279 | 1323.02070000 | 395.72050000  |
| 280 | 1323.39310000 | 226.28830000  |
| 281 | 1323.92270000 | 337.11770000  |
| 282 | 1324.66950000 | 159.53290000  |
| 283 | 1325.17850000 | 0.73800000    |
| 284 | 1325.35510000 | 89.63760000   |
| 285 | 1326.87830000 | 26.51100000   |
| 286 | 1329.53870000 | 22.21070000   |
| 287 | 1332.44260000 | 41.79960000   |
| 288 | 1345.91590000 | 423.36010000  |
| 289 | 1368.47400000 | 666.06350000  |
| 290 | 1373.06510000 | 4886.31110000 |
| 291 | 1375.65740000 | 96.92990000   |
| 292 | 1381.67590000 | 0.26870000    |
| 293 | 1382.01590000 | 0.19620000    |
| 294 | 1382.21690000 | 0.04000000    |
| 295 | 1383.16300000 | 0.71890000    |
| 296 | 1384.35750000 | 0.25500000    |
| 297 | 1385.13800000 | 1.78710000    |
| 298 | 1392.73230000 | 356.00010000  |
| 299 | 1396.90710000 | 234.48600000  |
| 300 | 1399.10820000 | 344.32800000  |
| 301 | 1399.26460000 | 1.41400000    |
| 302 | 1399.56860000 | 597.35020000  |
| 303 | 1399.77790000 | 1.17740000    |

|     |               |               |
|-----|---------------|---------------|
| 304 | 1400.01840000 | 189.85850000  |
| 305 | 1401.93380000 | 22.78060000   |
| 306 | 1402.02540000 | 7.35370000    |
| 307 | 1402.38050000 | 28.23030000   |
| 308 | 1409.21640000 | 102.23210000  |
| 309 | 1419.51030000 | 36.98330000   |
| 310 | 1420.49000000 | 124.26710000  |
| 311 | 1420.99470000 | 252.39970000  |
| 312 | 1422.09310000 | 1352.66930000 |
| 313 | 1422.57070000 | 80.24460000   |
| 314 | 1425.69080000 | 20.84310000   |
| 315 | 1430.73550000 | 14.23600000   |
| 316 | 1439.97140000 | 223.47080000  |
| 317 | 1447.57630000 | 7.45300000    |
| 318 | 1447.67450000 | 6.45260000    |
| 319 | 1449.18050000 | 17.01050000   |
| 320 | 1449.31250000 | 4.28680000    |
| 321 | 1449.88400000 | 1.55550000    |
| 322 | 1451.80390000 | 3.81690000    |
| 323 | 1452.13630000 | 153.06050000  |
| 324 | 1453.00860000 | 258.20520000  |
| 325 | 1456.44700000 | 17.96760000   |
| 326 | 1457.54710000 | 37.35260000   |
| 327 | 1457.71280000 | 9.73750000    |
| 328 | 1457.80910000 | 9.14790000    |
| 329 | 1458.68110000 | 10.48960000   |
| 330 | 1459.21100000 | 6.56950000    |
| 331 | 1459.46810000 | 9.50880000    |
| 332 | 1460.00900000 | 5.35940000    |
| 333 | 1460.17160000 | 4.27050000    |
| 334 | 1460.81900000 | 13.47680000   |
| 335 | 1461.83800000 | 129.53170000  |
| 336 | 1465.32400000 | 0.30650000    |
| 337 | 1465.62000000 | 0.26620000    |
| 338 | 1465.83140000 | 0.12660000    |
| 339 | 1466.12060000 | 0.08070000    |
| 340 | 1467.34270000 | 51.27720000   |
| 341 | 1473.00030000 | 4.08270000    |
| 342 | 1473.92770000 | 8.54980000    |
| 343 | 1476.47820000 | 17.91750000   |
| 344 | 1477.04400000 | 15.71350000   |
| 345 | 1477.39340000 | 17.09670000   |
| 346 | 1478.44630000 | 14.91850000   |
| 347 | 1481.66990000 | 9.21810000    |
| 348 | 1484.74320000 | 22.88030000   |
| 349 | 1485.84410000 | 23.15360000   |
| 350 | 1492.33320000 | 222.60430000  |
| 351 | 1514.76530000 | 1493.99280000 |
| 352 | 1514.87710000 | 735.01470000  |
| 353 | 1543.57580000 | 327.46140000  |
| 354 | 1543.87230000 | 538.37570000  |

|     |               |                |
|-----|---------------|----------------|
| 355 | 1545.23260000 | 32.86510000    |
| 356 | 1561.58390000 | 9516.04140000  |
| 357 | 1600.93570000 | 2761.07080000  |
| 358 | 1623.05560000 | 6.75160000     |
| 359 | 1645.02700000 | 0.42620000     |
| 360 | 1657.08410000 | 64.29800000    |
| 361 | 1658.71610000 | 1224.13510000  |
| 362 | 1662.06200000 | 2.50520000     |
| 363 | 1680.76040000 | 1078.87010000  |
| 364 | 1684.69740000 | 124.69980000   |
| 365 | 1713.83710000 | 966.84600000   |
| 366 | 1732.08270000 | 1970.63700000  |
| 367 | 1757.16360000 | 1532.78630000  |
| 368 | 1774.35110000 | 2742.06290000  |
| 369 | 2036.07250000 | 23993.49420000 |
| 370 | 2163.93870000 | 3576.69470000  |
| 371 | 3044.37640000 | 34.12990000    |
| 372 | 3045.66170000 | 42.66650000    |
| 373 | 3045.70440000 | 26.19440000    |
| 374 | 3045.82120000 | 35.66180000    |
| 375 | 3046.75370000 | 39.26540000    |
| 376 | 3047.17210000 | 32.56480000    |
| 377 | 3048.29890000 | 15.06130000    |
| 378 | 3049.00670000 | 29.92810000    |
| 379 | 3049.31380000 | 24.61360000    |
| 380 | 3049.38400000 | 40.15300000    |
| 381 | 3049.45250000 | 11.02030000    |
| 382 | 3049.84120000 | 34.73230000    |
| 383 | 3056.55080000 | 27.80650000    |
| 384 | 3059.96510000 | 22.82190000    |
| 385 | 3060.83480000 | 21.52560000    |
| 386 | 3061.17970000 | 41.42960000    |
| 387 | 3061.30910000 | 27.57580000    |
| 388 | 3063.54300000 | 17.89040000    |
| 389 | 3065.64330000 | 26.55380000    |
| 390 | 3066.53960000 | 47.56280000    |
| 391 | 3067.85360000 | 25.34410000    |
| 392 | 3067.89890000 | 27.59710000    |
| 393 | 3068.83390000 | 25.05700000    |
| 394 | 3070.89360000 | 29.73190000    |
| 395 | 3071.88600000 | 12.85410000    |
| 396 | 3081.39270000 | 68.47580000    |
| 397 | 3081.60300000 | 26.19560000    |
| 398 | 3089.82630000 | 14.42710000    |
| 399 | 3090.86800000 | 8.34030000     |
| 400 | 3090.90030000 | 11.26890000    |
| 401 | 3091.18800000 | 10.85400000    |
| 402 | 3094.58090000 | 5.25180000     |
| 403 | 3096.76920000 | 2.48850000     |
| 404 | 3115.30970000 | 4.47940000     |
| 405 | 3116.07510000 | 7.63380000     |



|     |               |             |
|-----|---------------|-------------|
| 406 | 3116.97990000 | 39.17240000 |
| 407 | 3119.03970000 | 11.67140000 |
| 408 | 3119.39140000 | 9.59620000  |
| 409 | 3120.77010000 | 11.09680000 |
| 410 | 3121.73540000 | 13.71070000 |
| 411 | 3131.80450000 | 14.64350000 |
| 412 | 3132.01650000 | 3.97870000  |
| 413 | 3134.86550000 | 6.61960000  |
| 414 | 3135.71370000 | 4.47200000  |
| 415 | 3137.52160000 | 20.36820000 |
| 416 | 3137.63320000 | 1.43830000  |
| 417 | 3137.89330000 | 58.41280000 |
| 418 | 3139.67120000 | 61.35430000 |
| 419 | 3139.71070000 | 56.16780000 |
| 420 | 3139.89350000 | 47.90310000 |
| 421 | 3140.02880000 | 47.33080000 |
| 422 | 3140.15490000 | 55.62780000 |
| 423 | 3146.33400000 | 28.96700000 |
| 424 | 3147.91650000 | 27.69540000 |
| 425 | 3148.46330000 | 34.81340000 |
| 426 | 3148.52250000 | 30.49540000 |
| 427 | 3148.55060000 | 32.60620000 |
| 428 | 3148.65390000 | 29.94910000 |
| 429 | 3169.12040000 | 12.02920000 |
| 430 | 3172.45260000 | 10.99180000 |
| 431 | 3200.26810000 | 44.10620000 |
| 432 | 3210.27630000 | 0.48340000  |
| 433 | 3210.38920000 | 2.54890000  |
| 434 | 3214.96670000 | 4.12800000  |
| 435 | 3218.18970000 | 4.22840000  |
| 436 | 3218.40460000 | 4.17130000  |
| 437 | 3224.65450000 | 39.46150000 |
| 438 | 3228.59880000 | 77.39650000 |
| 439 | 3230.35380000 | 1.68630000  |
| 440 | 3230.37530000 | 2.57280000  |
| 441 | 3233.33950000 | 21.14020000 |
| 442 | 3233.46640000 | 5.59150000  |
| 443 | 3234.76680000 | 6.33300000  |
| 444 | 3241.93860000 | 2.62900000  |
| 445 | 3242.81430000 | 5.11610000  |
| 446 | 3243.65660000 | 1.89560000  |
| 447 | 3247.34690000 | 21.53430000 |

## 6 Crystallographic data

|                                                |                                                               |
|------------------------------------------------|---------------------------------------------------------------|
| Identification code                            | NDI-Pt-PTZ                                                    |
| Empirical formula                              | $C_{77}H_{105}N_3O_4P_2PtS$                                   |
| Formula weight                                 | 1425.72                                                       |
| Temperature/K                                  | 100                                                           |
| Crystal system                                 | triclinic                                                     |
| Space group                                    | P-1                                                           |
| a/Å                                            | 9.6512(8)                                                     |
| b/Å                                            | 19.5530(12)                                                   |
| c/Å                                            | 20.0708(7)                                                    |
| $\alpha/^\circ$                                | 71.675(4)                                                     |
| $\beta/^\circ$                                 | 89.523(4)                                                     |
| $\gamma/^\circ$                                | 88.863(6)                                                     |
| Volume/Å <sup>3</sup>                          | 3594.8(4)                                                     |
| Z                                              | 2                                                             |
| $\rho_{\text{calc}}/\text{cm}^3$               | 1.317                                                         |
| $\mu/\text{mm}^{-1}$                           | 1.911                                                         |
| F(000)                                         | 1488.0                                                        |
| Crystal size/mm <sup>3</sup>                   | 0.119 × 0.017 × 0.0085                                        |
| Radiation                                      | Synchrotron ( $\lambda = 0.6889 \text{ \AA}$ )                |
| 2 $\Theta$ range for data collection/ $^\circ$ | 3.404 to 40.29                                                |
| Index ranges                                   | $-7 \leq h \leq 9, -19 \leq k \leq 19, -20 \leq l \leq 20$    |
| Reflections collected                          | 22160                                                         |
| Independent reflections                        | 7084 [ $R_{\text{int}} = 0.1700, R_{\text{sigma}} = 0.1098$ ] |
| Data/restraints/parameters                     | 7084/678/800                                                  |
| Goodness-of-fit on $F^2$                       | 1.098                                                         |
| Final R indexes [ $I \geq 2\sigma(I)$ ]        | $R_1 = 0.1078, wR_2 = 0.3157$                                 |
| Final R indexes [all data]                     | $R_1 = 0.1246, wR_2 = 0.3265$                                 |
| Largest diff. peak/hole / e Å <sup>-3</sup>    | 3.90/-1.86                                                    |

Table S2. Crystal data and structure refinement for NDI-Pt-PTZ.

| Atom | x           | y          | z          | U(eq)     |
|------|-------------|------------|------------|-----------|
| Pt1  | 5489.3 (12) | 2632.2 (5) | 3222.8 (5) | 48.9 (5)  |
| S1   | 14265 (8)   | -713 (3)   | 1256 (3)   | 53.7 (18) |
| P1   | 5853 (8)    | 3506 (4)   | 2174 (3)   | 51.5 (18) |
| P2   | 5255 (8)    | 1688 (3)   | 4228 (3)   | 50.5 (18) |
| O1   | 5530 (16)   | 5047 (8)   | 3421 (7)   | 41 (4)    |
| O2   | 4592 (16)   | 6915 (8)   | 4254 (7)   | 39 (4)    |
| O3   | 454 (18)    | 3006 (8)   | 5763 (7)   | 47 (4)    |
| O4   | -439 (19)   | 4922 (8)   | 6524 (8)   | 57 (5)    |
| N1   | 5090 (20)   | 5967 (9)   | 3861 (9)   | 43 (4)    |
| N2   | -40 (20)    | 3969 (10)  | 6125 (9)   | 43 (4)    |
| N3   | 11140 (20)  | -413 (10)  | 1264 (10)  | 46 (4)    |
| C1   | 4600 (30)   | 3329 (12)  | 3619 (13)  | 48 (6)    |
| C2   | 4160 (30)   | 3751 (12)  | 3930 (12)  | 44 (6)    |
| C3   | 3510 (20)   | 4151 (11)  | 4322 (11)  | 36 (5)    |
| C4   | 3770 (20)   | 4838 (11)  | 4312 (10)  | 30 (4)    |
| C5   | 4850 (20)   | 5278 (11)  | 3830 (11)  | 35 (5)    |
| C6   | 4360 (20)   | 6308 (11)  | 4284 (10)  | 31 (4)    |
| C7   | 3320 (20)   | 5861 (11)  | 4754 (10)  | 34 (4)    |
| C8   | 3060 (20)   | 5163 (11)  | 4742 (10)  | 32 (4)    |
| C9   | 2630 (30)   | 6154 (13)  | 5216 (12)  | 49 (6)    |
| C10  | 1600 (30)   | 5745 (12)  | 5682 (12)  | 45 (6)    |
| C11  | 1330 (30)   | 5073 (12)  | 5675 (11)  | 42 (5)    |
| C12  | 1990 (30)   | 4754 (12)  | 5224 (12)  | 43 (5)    |
| C13  | 220 (20)    | 4670 (12)  | 6134 (11)  | 37 (5)    |
| C14  | 630 (30)    | 3635 (12)  | 5728 (11)  | 40 (5)    |
| C15  | 1750 (20)   | 4060 (11)  | 5226 (10)  | 33 (4)    |
| C16  | 2450 (20)   | 3753 (12)  | 4783 (11)  | 41 (5)    |
| C17  | 6050 (30)   | 6411 (12)  | 3338 (11)  | 44 (5)    |
| C18  | 5360 (30)   | 6815 (13)  | 2645 (12)  | 50 (6)    |
| C19  | 6390 (30)   | 7265 (14)  | 2101 (13)  | 57 (6)    |
| C20  | 7230 (30)   | 6855 (15)  | 1741 (14)  | 64 (6)    |
| C21  | 6650 (30)   | 6576 (14)  | 1229 (13)  | 59 (6)    |
| C22  | 7510 (40)   | 6121 (18)  | 917 (16)   | 84 (8)    |
| C23  | 6990 (50)   | 5860 (19)  | 378 (17)   | 103 (10)  |
| C24  | 8070 (60)   | 5430 (30)  | 80 (20)    | 158 (18)  |
| C25  | -1080 (30)  | 3558 (12)  | 6617 (11)  | 43 (5)    |
| C26  | -510 (30)   | 3182 (12)  | 7364 (11)  | 44 (5)    |
| C27  | -1680 (30)  | 2894 (12)  | 7870 (11)  | 44 (5)    |
| C28  | -1290 (30)  | 2523 (13)  | 8621 (12)  | 52 (6)    |
| C29  | -2560 (30)  | 2358 (16)  | 9089 (13)  | 68 (7)    |
| C30  | -2280 (40)  | 1951 (18)  | 9874 (15)  | 84 (8)    |
| C31  | -1410 (40)  | 2306 (19)  | 10210 (16) | 91 (8)    |
| C32  | -1870 (40)  | 3060 (20)  | 10180 (20) | 111 (12)  |
| C33  | 6300 (30)   | 1923 (14)  | 2801 (15)  | 63 (7)    |
| C34  | 6880 (30)   | 1523 (13)  | 2498 (13)  | 52 (6)    |
| C35  | 7600 (30)   | 1053 (12)  | 2194 (12)  | 47 (5)    |
| C36  | 6820 (30)   | 718 (12)   | 1761 (12)  | 48 (5)    |
| C37  | 7530 (30)   | 263 (13)   | 1461 (13)  | 49 (5)    |
| C38  | 8960 (30)   | 150 (12)   | 1538 (12)  | 43 (5)    |
| C39  | 9630 (30)   | 516 (12)   | 1915 (12)  | 48 (5)    |

|     |            |            |           |          |
|-----|------------|------------|-----------|----------|
| C40 | 8950 (30)  | 981 (12)   | 2194 (12) | 46 (5)   |
| C41 | 9610 (30)  | -351 (12)  | 1203 (12) | 43 (4)   |
| C42 | 11980 (30) | 166 (12)   | 809 (11)  | 41 (4)   |
| C43 | 11290 (30) | 782 (12)   | 379 (12)  | 53 (5)   |
| C44 | 12090 (30) | 1327 (14)  | -105 (13) | 56 (6)   |
| C45 | 13530 (30) | 1270 (13)  | -118 (13) | 55 (6)   |
| C46 | 14160 (30) | 655 (12)   | 327 (12)  | 50 (5)   |
| C47 | 13380 (30) | 95 (12)    | 782 (13)  | 49 (5)   |
| C48 | 11740 (30) | -840 (12)  | 1897 (12) | 42 (4)   |
| C49 | 10820 (30) | -1150 (12) | 2502 (12) | 46 (5)   |
| C50 | 11420 (30) | -1587 (12) | 3126 (13) | 52 (5)   |
| C51 | 12870 (30) | -1718 (13) | 3198 (14) | 58 (6)   |
| C52 | 13670 (30) | -1412 (12) | 2622 (13) | 53 (5)   |
| C53 | 13120 (30) | -995 (11)  | 1991 (12) | 43 (4)   |
| C54 | 5190 (30)  | 4393 (14)  | 2070 (14) | 61 (6)   |
| C55 | 3700 (30)  | 4472 (13)  | 2007 (13) | 56 (6)   |
| C56 | 3090 (30)  | 5248 (15)  | 1924 (18) | 79 (8)   |
| C57 | 1510 (30)  | 5287 (14)  | 1794 (16) | 71 (7)   |
| C58 | 5180 (30)  | 3251 (13)  | 1469 (12) | 54 (5)   |
| C59 | 3720 (30)  | 2933 (14)  | 1559 (13) | 58 (6)   |
| C60 | 3500 (30)  | 2373 (16)  | 1275 (16) | 75 (8)   |
| C61 | 2070 (40)  | 2090 (19)  | 1340 (20) | 98 (11)  |
| C62 | 7740 (30)  | 3546 (17)  | 1993 (15) | 72 (6)   |
| C63 | 8660 (40)  | 3560 (20)  | 2617 (17) | 97 (10)  |
| C64 | 10090 (40) | 3270 (20)  | 2630 (19) | 96 (9)   |
| C65 | 10980 (40) | 3290 (20)  | 3250 (20) | 105 (11) |
| C66 | 4250 (30)  | 1874 (13)  | 4921 (13) | 54 (6)   |
| C67 | 4020 (30)  | 1266 (13)  | 5620 (13) | 61 (7)   |
| C68 | 3130 (40)  | 1519 (15)  | 6104 (15) | 77 (9)   |
| C69 | 2840 (40)  | 922 (17)   | 6773 (17) | 99 (12)  |
| C70 | 4370 (30)  | 945 (13)   | 4041 (14) | 60 (6)   |
| C71 | 3080 (40)  | 1159 (16)  | 3696 (19) | 86 (9)   |
| C72 | 2330 (40)  | 560 (18)   | 3500 (20) | 98 (9)   |
| C73 | 3130 (40)  | 302 (18)   | 2990 (20) | 98 (10)  |
| C74 | 6900 (30)  | 1319 (13)  | 4565 (14) | 57 (5)   |
| C75 | 7840 (30)  | 1847 (15)  | 4743 (15) | 65 (6)   |
| C76 | 9330 (40)  | 1560 (20)  | 4970 (30) | 137 (16) |
| C77 | 9920 (50)  | 940 (20)   | 5270 (30) | 180 (20) |

Table S3. Fractional atomic coordinates ( $\times 10^4$ ) and equivalent isotropic displacement parameters ( $\text{\AA}^2 \times 10^4$ ) for NDI-Pt-PTZ.  $U_{\text{eq}}$  is defined as  $1/3$  of the trace of the orthogonalised  $U_{\text{IJ}}$  tensor.

| Atom | $U_{11}$ | $U_{22}$ | $U_{33}$ | $U_{23}$  | $U_{13}$ | $U_{12}$ |
|------|----------|----------|----------|-----------|----------|----------|
| Pt1  | 66.3 (9) | 43.7 (6) | 39.7 (6) | -17.8 (5) | 8.1 (5)  | 2.7 (5)  |
| S1   | 61 (5)   | 45 (3)   | 50 (4)   | -9 (3)    | 17 (3)   | -5 (3)   |
| P1   | 60 (5)   | 53 (4)   | 43 (4)   | -17 (3)   | 7 (3)    | -6 (3)   |
| P2   | 70 (5)   | 36 (3)   | 46 (4)   | -14 (3)   | -2 (3)   | 2 (3)    |
| O1   | 41 (9)   | 44 (8)   | 35 (7)   | -10 (6)   | 8 (6)    | -3 (6)   |
| O2   | 43 (10)  | 39 (6)   | 33 (8)   | -10 (5)   | -1 (7)   | -3 (6)   |
| O3   | 66 (11)  | 42 (6)   | 32 (8)   | -11 (6)   | 22 (8)   | -16 (6)  |
| O4   | 81 (11)  | 44 (8)   | 44 (9)   | -12 (7)   | 31 (8)   | -7 (7)   |
| N1   | 52 (9)   | 40 (6)   | 34 (7)   | -10 (5)   | 10 (7)   | -5 (5)   |
| N2   | 49 (9)   | 44 (6)   | 36 (7)   | -12 (5)   | 8 (7)    | -4 (6)   |
| N3   | 55 (7)   | 39 (7)   | 45 (7)   | -14 (5)   | 9 (5)    | -8 (5)   |
| C1   | 52 (15)  | 42 (8)   | 51 (10)  | -17 (8)   | 2 (9)    | 4 (8)    |
| C2   | 53 (13)  | 34 (9)   | 44 (11)  | -11 (8)   | 16 (10)  | -8 (8)   |
| C3   | 41 (10)  | 36 (6)   | 28 (8)   | -7 (6)    | -1 (7)   | 3 (6)    |
| C4   | 32 (8)   | 35 (6)   | 18 (7)   | -4 (5)    | -8 (6)   | 6 (5)    |
| C5   | 37 (9)   | 40 (6)   | 26 (8)   | -6 (6)    | -2 (7)   | 2 (6)    |
| C6   | 33 (9)   | 37 (6)   | 19 (7)   | -3 (5)    | -12 (6)  | 5 (6)    |
| C7   | 38 (9)   | 36 (6)   | 25 (8)   | -6 (5)    | -4 (7)   | 2 (6)    |
| C8   | 33 (9)   | 36 (6)   | 25 (8)   | -7 (5)    | -5 (7)   | 4 (5)    |
| C9   | 62 (12)  | 40 (8)   | 49 (10)  | -18 (8)   | 19 (10)  | -10 (8)  |
| C10  | 57 (12)  | 43 (7)   | 37 (10)  | -16 (7)   | 13 (9)   | -9 (7)   |
| C11  | 54 (10)  | 39 (7)   | 32 (9)   | -12 (6)   | 11 (8)   | -5 (6)   |
| C12  | 53 (10)  | 41 (6)   | 37 (9)   | -15 (6)   | 11 (8)   | -7 (6)   |
| C13  | 44 (10)  | 42 (6)   | 22 (8)   | -6 (6)    | 0 (7)    | 0 (6)    |
| C14  | 44 (10)  | 41 (6)   | 33 (9)   | -11 (6)   | 5 (8)    | -6 (6)   |
| C15  | 36 (9)   | 35 (6)   | 25 (8)   | -6 (5)    | -3 (7)   | 1 (6)    |
| C16  | 48 (10)  | 40 (8)   | 34 (9)   | -11 (7)   | 5 (8)    | -2 (7)   |
| C17  | 51 (10)  | 43 (9)   | 34 (7)   | -9 (6)    | 8 (7)    | -5 (7)   |
| C18  | 55 (12)  | 52 (11)  | 36 (7)   | -5 (7)    | 2 (7)    | -12 (9)  |
| C19  | 58 (13)  | 63 (11)  | 39 (9)   | 1 (7)     | 1 (8)    | -13 (9)  |
| C20  | 59 (13)  | 73 (14)  | 51 (11)  | -8 (10)   | 6 (9)    | -11 (10) |
| C21  | 64 (15)  | 61 (13)  | 41 (11)  | 2 (10)    | 13 (10)  | -21 (11) |
| C22  | 97 (19)  | 89 (17)  | 58 (14)  | -15 (13)  | 9 (12)   | 6 (14)   |
| C23  | 160 (30) | 85 (19)  | 63 (15)  | -18 (15)  | 0 (15)   | 3 (17)   |
| C24  | 220 (40) | 170 (40) | 100 (30) | -60 (30)  | -10 (20) | 60 (30)  |
| C25  | 40 (10)  | 47 (9)   | 36 (7)   | -6 (6)    | 5 (6)    | 3 (7)    |
| C26  | 47 (11)  | 43 (11)  | 36 (7)   | -5 (7)    | 3 (6)    | -1 (9)   |
| C27  | 55 (12)  | 40 (11)  | 35 (7)   | -10 (7)   | 7 (7)    | -10 (9)  |
| C28  | 71 (13)  | 46 (12)  | 36 (7)   | -7 (7)    | 4 (7)    | -19 (10) |
| C29  | 80 (14)  | 70 (16)  | 48 (8)   | -8 (8)    | 17 (8)   | -23 (11) |
| C30  | 100 (20) | 91 (15)  | 48 (9)   | -6 (9)    | 14 (9)   | -26 (13) |
| C31  | 110 (20) | 106 (17) | 57 (13)  | -19 (12)  | 14 (13)  | -29 (15) |
| C32  | 130 (30) | 113 (17) | 100 (30) | -38 (16)  | 10 (20)  | -23 (16) |
| C33  | 70 (17)  | 57 (9)   | 70 (11)  | -31 (8)   | 11 (11)  | 1 (9)    |
| C34  | 59 (12)  | 51 (11)  | 53 (13)  | -25 (11)  | 5 (10)   | -3 (9)   |
| C35  | 56 (9)   | 42 (10)  | 45 (11)  | -17 (9)   | 9 (7)    | -6 (7)   |
| C36  | 59 (9)   | 45 (11)  | 42 (11)  | -16 (10)  | 3 (8)    | -1 (7)   |
| C37  | 51 (8)   | 48 (11)  | 54 (12)  | -24 (10)  | 10 (7)   | -11 (7)  |
| C38  | 51 (8)   | 38 (9)   | 41 (11)  | -14 (9)   | 9 (7)    | -11 (7)  |

|     |          |          |          |          |           |          |
|-----|----------|----------|----------|----------|-----------|----------|
| C39 | 52 (9)   | 47 (11)  | 50 (12)  | -23 (10) | 10 (8)    | -11 (7)  |
| C40 | 56 (9)   | 45 (10)  | 41 (12)  | -18 (10) | 7 (8)     | -7 (7)   |
| C41 | 53 (7)   | 39 (9)   | 37 (10)  | -12 (8)  | 9 (6)     | -9 (6)   |
| C42 | 55 (7)   | 38 (7)   | 35 (8)   | -17 (6)  | 10 (6)    | -8 (5)   |
| C43 | 66 (10)  | 44 (8)   | 46 (10)  | -12 (7)  | 11 (7)    | -2 (6)   |
| C44 | 69 (10)  | 51 (9)   | 45 (11)  | -7 (8)   | 8 (8)     | -8 (7)   |
| C45 | 69 (10)  | 49 (9)   | 47 (11)  | -15 (8)  | 6 (8)     | -9 (7)   |
| C46 | 55 (9)   | 46 (8)   | 48 (10)  | -13 (7)  | 10 (7)    | -14 (7)  |
| C47 | 56 (7)   | 42 (7)   | 50 (9)   | -16 (6)  | 12 (6)    | -9 (5)   |
| C48 | 52 (7)   | 36 (9)   | 40 (6)   | -14 (6)  | 12 (5)    | -5 (6)   |
| C49 | 57 (9)   | 37 (10)  | 45 (7)   | -15 (6)  | 16 (6)    | -7 (7)   |
| C50 | 68 (10)  | 39 (11)  | 50 (8)   | -14 (7)  | 10 (7)    | -7 (8)   |
| C51 | 68 (10)  | 47 (12)  | 54 (8)   | -10 (8)  | 9 (7)     | -3 (9)   |
| C52 | 61 (10)  | 43 (11)  | 52 (7)   | -12 (7)  | 6 (6)     | -6 (8)   |
| C53 | 51 (7)   | 30 (9)   | 49 (7)   | -16 (6)  | 12 (5)    | -7 (6)   |
| C54 | 78 (11)  | 55 (8)   | 53 (13)  | -23 (8)  | 8 (9)     | -8 (7)   |
| C55 | 79 (11)  | 49 (10)  | 43 (14)  | -21 (10) | 10 (9)    | -6 (8)   |
| C56 | 91 (13)  | 54 (11)  | 100 (20) | -34 (12) | 9 (12)    | -1 (9)   |
| C57 | 90 (13)  | 42 (13)  | 80 (20)  | -20 (13) | 13 (12)   | -5 (10)  |
| C58 | 76 (11)  | 48 (11)  | 36 (8)   | -10 (8)  | 7 (7)     | -9 (8)   |
| C59 | 74 (11)  | 53 (12)  | 46 (13)  | -13 (11) | 8 (9)     | -10 (9)  |
| C60 | 94 (16)  | 64 (13)  | 73 (18)  | -29 (13) | 10 (12)   | -16 (11) |
| C61 | 99 (17)  | 100 (20) | 110 (30) | -60 (20) | 20 (15)   | -35 (15) |
| C62 | 70 (8)   | 88 (15)  | 71 (12)  | -41 (11) | 20 (7)    | -22 (7)  |
| C63 | 76 (11)  | 150 (30) | 76 (15)  | -53 (16) | 18 (10)   | -30 (12) |
| C64 | 71 (12)  | 130 (20) | 99 (18)  | -49 (16) | 19 (11)   | -39 (13) |
| C65 | 93 (18)  | 120 (30) | 120 (20) | -59 (19) | -5 (15)   | -15 (17) |
| C66 | 72 (13)  | 39 (9)   | 50 (8)   | -12 (7)  | 7 (8)     | -3 (8)   |
| C67 | 83 (18)  | 47 (11)  | 51 (9)   | -10 (7)  | 3 (9)     | -18 (10) |
| C68 | 110 (20) | 55 (12)  | 60 (11)  | -10 (9)  | 22 (12)   | -14 (12) |
| C69 | 140 (30) | 67 (16)  | 71 (12)  | 2 (11)   | 35 (16)   | -8 (17)  |
| C70 | 76 (12)  | 47 (9)   | 58 (13)  | -20 (9)  | -6 (9)    | -5 (8)   |
| C71 | 89 (13)  | 67 (13)  | 110 (20) | -43 (13) | -35 (13)  | 4 (10)   |
| C72 | 108 (17) | 72 (16)  | 120 (20) | -45 (16) | -40 (14)  | -4 (12)  |
| C73 | 110 (20) | 80 (20)  | 130 (20) | -53 (18) | -41 (18)  | -4 (17)  |
| C74 | 71 (8)   | 42 (10)  | 59 (12)  | -16 (9)  | 1 (7)     | -5 (7)   |
| C75 | 82 (12)  | 62 (12)  | 55 (15)  | -26 (12) | 12 (10)   | -22 (9)  |
| C76 | 98 (14)  | 94 (18)  | 240 (40) | -70 (20) | -44 (18)  | -2 (13)  |
| C77 | 150 (30) | 97 (19)  | 310 (60) | -90 (30) | -100 (30) | 10 (18)  |

Table S4. Anisotropy displacement parameters ( $\text{\AA}^2 \times 10^3$ ) for NDI-Pt-PTZ. The anisotropy displacement exponent takes the form:

| $-2\pi^2[h^2a^*{}^2U_{11} + 2hka^*b^*U_{12} + \dots]$ |     | Length/ $\text{\AA}$ | Atom | Atom | Length/ $\text{\AA}$ |
|-------------------------------------------------------|-----|----------------------|------|------|----------------------|
| Pt1                                                   | P1  | 2.285 (7)            | C23  | C24  | 1.56 (5)             |
| Pt1                                                   | P2  | 2.280 (7)            | C25  | C26  | 1.55 (3)             |
| Pt1                                                   | C1  | 1.96 (2)             | C26  | C27  | 1.50 (3)             |
| Pt1                                                   | C33 | 1.98 (3)             | C27  | C28  | 1.50 (3)             |
| S1                                                    | C47 | 1.77 (3)             | C28  | C29  | 1.51 (4)             |
| S1                                                    | C53 | 1.79 (2)             | C29  | C30  | 1.55 (4)             |
| P1                                                    | C54 | 1.79 (3)             | C30  | C31  | 1.40 (4)             |
| P1                                                    | C58 | 1.78 (2)             | C31  | C32  | 1.51 (5)             |
| P1                                                    | C62 | 1.86 (3)             | C33  | C34  | 1.25 (3)             |
| P2                                                    | C66 | 1.81 (3)             | C34  | C35  | 1.42 (3)             |
| P2                                                    | C70 | 1.84 (2)             | C35  | C36  | 1.46 (3)             |
| P2                                                    | C74 | 1.78 (3)             | C35  | C40  | 1.31 (3)             |
| O1                                                    | C5  | 1.23 (2)             | C36  | C37  | 1.39 (3)             |
| O2                                                    | C6  | 1.19 (2)             | C37  | C38  | 1.40 (3)             |
| O3                                                    | C14 | 1.22 (2)             | C38  | C39  | 1.36 (3)             |
| O4                                                    | C13 | 1.22 (3)             | C38  | C41  | 1.48 (3)             |
| N1                                                    | C5  | 1.39 (3)             | C39  | C40  | 1.36 (3)             |
| N1                                                    | C6  | 1.41 (3)             | C42  | C43  | 1.40 (3)             |
| N1                                                    | C17 | 1.47 (3)             | C42  | C47  | 1.36 (3)             |
| N2                                                    | C13 | 1.40 (3)             | C43  | C44  | 1.43 (3)             |
| N2                                                    | C14 | 1.34 (3)             | C44  | C45  | 1.39 (4)             |
| N2                                                    | C25 | 1.46 (3)             | C45  | C46  | 1.39 (4)             |
| N3                                                    | C41 | 1.48 (3)             | C46  | C47  | 1.42 (3)             |
| N3                                                    | C42 | 1.47 (3)             | C48  | C49  | 1.47 (3)             |
| N3                                                    | C48 | 1.40 (3)             | C48  | C53  | 1.37 (3)             |
| C1                                                    | C2  | 1.25 (3)             | C49  | C50  | 1.40 (3)             |
| C2                                                    | C3  | 1.41 (3)             | C50  | C51  | 1.42 (4)             |
| C3                                                    | C4  | 1.37 (3)             | C51  | C52  | 1.36 (4)             |
| C3                                                    | C16 | 1.44 (3)             | C52  | C53  | 1.38 (3)             |
| C4                                                    | C5  | 1.50 (3)             | C54  | C55  | 1.44 (4)             |
| C4                                                    | C8  | 1.39 (3)             | C55  | C56  | 1.57 (4)             |
| C6                                                    | C7  | 1.47 (3)             | C56  | C57  | 1.55 (4)             |
| C7                                                    | C8  | 1.40 (3)             | C58  | C59  | 1.53 (4)             |
| C7                                                    | C9  | 1.40 (3)             | C59  | C60  | 1.41 (4)             |
| C8                                                    | C12 | 1.47 (3)             | C60  | C61  | 1.48 (4)             |
| C9                                                    | C10 | 1.43 (3)             | C62  | C63  | 1.55 (4)             |
| C10                                                   | C11 | 1.35 (3)             | C63  | C64  | 1.47 (5)             |
| C11                                                   | C12 | 1.39 (3)             | C64  | C65  | 1.52 (5)             |
| C11                                                   | C13 | 1.48 (3)             | C66  | C67  | 1.55 (3)             |
| C12                                                   | C15 | 1.38 (3)             | C67  | C68  | 1.48 (4)             |
| C14                                                   | C15 | 1.54 (3)             | C68  | C69  | 1.51 (4)             |
| C15                                                   | C16 | 1.39 (3)             | C70  | C71  | 1.42 (4)             |
| C17                                                   | C18 | 1.52 (3)             | C71  | C72  | 1.55 (4)             |
| C18                                                   | C19 | 1.54 (3)             | C72  | C73  | 1.47 (5)             |
| C19                                                   | C20 | 1.47 (4)             | C74  | C75  | 1.52 (3)             |
| C20                                                   | C21 | 1.43 (4)             | C75  | C76  | 1.55 (5)             |
| C21                                                   | C22 | 1.48 (4)             | C76  | C77  | 1.30 (5)             |
| C22                                                   | C23 | 1.43 (4)             |      |      |                      |

Table S5. Bond lengths for NDI-Pt-PTZ.

| Atom | Atom | Atom | Angle/°    | Atom | Atom | Atom | Angle/°    |
|------|------|------|------------|------|------|------|------------|
| P2   | Pt1  | P1   | 174.5 (2)  | N1   | C17  | C18  | 113 (2)    |
| C1   | Pt1  | P1   | 91.5 (7)   | C17  | C18  | C19  | 112 (2)    |
| C1   | Pt1  | P2   | 93.9 (7)   | C20  | C19  | C18  | 115 (2)    |
| C1   | Pt1  | C33  | 177.3 (12) | C21  | C20  | C19  | 121 (3)    |
| C33  | Pt1  | P1   | 88.1 (8)   | C20  | C21  | C22  | 120 (3)    |
| C33  | Pt1  | P2   | 86.5 (8)   | C23  | C22  | C21  | 122 (3)    |
| C47  | S1   | C53  | 98.3 (12)  | C22  | C23  | C24  | 115 (4)    |
| C54  | P1   | Pt1  | 118.0 (9)  | N2   | C25  | C26  | 114 (2)    |
| C54  | P1   | C62  | 109.5 (14) | C27  | C26  | C25  | 111 (2)    |
| C58  | P1   | Pt1  | 110.9 (8)  | C28  | C27  | C26  | 117 (2)    |
| C58  | P1   | C54  | 106.4 (13) | C27  | C28  | C29  | 111 (2)    |
| C58  | P1   | C62  | 102.8 (13) | C28  | C29  | C30  | 116 (3)    |
| C62  | P1   | Pt1  | 108.1 (11) | C31  | C30  | C29  | 115 (3)    |
| C66  | P2   | Pt1  | 115.7 (8)  | C30  | C31  | C32  | 116 (3)    |
| C66  | P2   | C70  | 105.4 (13) | C34  | C33  | Pt1  | 175 (2)    |
| C70  | P2   | Pt1  | 110.1 (9)  | C33  | C34  | C35  | 176 (3)    |
| C74  | P2   | Pt1  | 111.0 (9)  | C34  | C35  | C36  | 119 (2)    |
| C74  | P2   | C66  | 109.2 (13) | C40  | C35  | C34  | 124 (2)    |
| C74  | P2   | C70  | 104.7 (12) | C40  | C35  | C36  | 117 (2)    |
| C5   | N1   | C6   | 125.8 (19) | C37  | C36  | C35  | 118 (2)    |
| C5   | N1   | C17  | 116.7 (18) | C36  | C37  | C38  | 121 (2)    |
| C6   | N1   | C17  | 116.9 (17) | C37  | C38  | C41  | 117 (2)    |
| C13  | N2   | C25  | 117.6 (18) | C39  | C38  | C37  | 117 (2)    |
| C14  | N2   | C13  | 125 (2)    | C39  | C38  | C41  | 126 (2)    |
| C14  | N2   | C25  | 117.3 (19) | C40  | C39  | C38  | 123 (3)    |
| C42  | N3   | C41  | 118.9 (19) | C35  | C40  | C39  | 123 (2)    |
| C48  | N3   | C41  | 119.2 (19) | C38  | C41  | N3   | 114.5 (19) |
| C48  | N3   | C42  | 117 (2)    | C43  | C42  | N3   | 118 (2)    |
| C2   | C1   | Pt1  | 173 (2)    | C47  | C42  | N3   | 121 (2)    |
| C1   | C2   | C3   | 172 (2)    | C47  | C42  | C43  | 121 (2)    |
| C2   | C3   | C16  | 112.6 (19) | C42  | C43  | C44  | 118 (3)    |
| C4   | C3   | C2   | 129 (2)    | C45  | C44  | C43  | 121 (3)    |
| C4   | C3   | C16  | 119 (2)    | C46  | C45  | C44  | 118 (2)    |
| C3   | C4   | C5   | 120.7 (19) | C45  | C46  | C47  | 121 (3)    |
| C3   | C4   | C8   | 122 (2)    | C42  | C47  | S1   | 122.0 (18) |
| C8   | C4   | C5   | 116.9 (18) | C42  | C47  | C46  | 120 (2)    |
| O1   | C5   | N1   | 120 (2)    | C46  | C47  | S1   | 118 (2)    |
| O1   | C5   | C4   | 122.5 (19) | N3   | C48  | C49  | 118 (2)    |
| N1   | C5   | C4   | 117.9 (19) | C53  | C48  | N3   | 124 (2)    |
| O2   | C6   | N1   | 121 (2)    | C53  | C48  | C49  | 117 (2)    |
| O2   | C6   | C7   | 124 (2)    | C50  | C49  | C48  | 118 (2)    |
| N1   | C6   | C7   | 114.8 (18) | C49  | C50  | C51  | 123 (2)    |
| C8   | C7   | C6   | 120.8 (19) | C52  | C51  | C50  | 117 (3)    |
| C9   | C7   | C6   | 117.5 (19) | C51  | C52  | C53  | 122 (3)    |
| C9   | C7   | C8   | 122 (2)    | C48  | C53  | S1   | 119.4 (19) |
| C4   | C8   | C7   | 124 (2)    | C48  | C53  | C52  | 123 (2)    |
| C4   | C8   | C12  | 118.9 (19) | C52  | C53  | S1   | 118 (2)    |
| C7   | C8   | C12  | 117.4 (19) | C55  | C54  | P1   | 115.0 (18) |
| C7   | C9   | C10  | 120 (2)    | C54  | C55  | C56  | 116 (2)    |



|     |     |     |            |     |     |     |            |
|-----|-----|-----|------------|-----|-----|-----|------------|
| C11 | C10 | C9  | 119 (2)    | C57 | C56 | C55 | 111 (2)    |
| C10 | C11 | C12 | 123 (2)    | C59 | C58 | P1  | 117.4 (18) |
| C10 | C11 | C13 | 119 (2)    | C60 | C59 | C58 | 117 (2)    |
| C12 | C11 | C13 | 118 (2)    | C59 | C60 | C61 | 116 (3)    |
| C11 | C12 | C8  | 118.6 (19) | C63 | C62 | P1  | 115 (2)    |
| C15 | C12 | C8  | 118 (2)    | C64 | C63 | C62 | 117 (3)    |
| C15 | C12 | C11 | 123 (2)    | C63 | C64 | C65 | 116 (3)    |
| O4  | C13 | N2  | 120 (2)    | C67 | C66 | P2  | 119.6 (18) |
| O4  | C13 | C11 | 122 (2)    | C68 | C67 | C66 | 111 (2)    |
| N2  | C13 | C11 | 118.1 (19) | C67 | C68 | C69 | 112 (2)    |
| O3  | C14 | N2  | 124 (2)    | C71 | C70 | P2  | 112.9 (19) |
| O3  | C14 | C15 | 118 (2)    | C70 | C71 | C72 | 115 (3)    |
| N2  | C14 | C15 | 117.3 (19) | C73 | C72 | C71 | 113 (3)    |
| C12 | C15 | C14 | 117.8 (19) | C75 | C74 | P2  | 114.3 (19) |
| C12 | C15 | C16 | 122 (2)    | C74 | C75 | C76 | 115 (2)    |
| C16 | C15 | C14 | 120.2 (19) | C77 | C76 | C75 | 136 (4)    |
| C15 | C16 | C3  | 120 (2)    |     |     |     |            |

Table S6. Bond angles for NDI-Pt-PTZ.

| Atom | x     | y    | z    | U(eq) |
|------|-------|------|------|-------|
| H9   | 2840  | 6625 | 5221 | 59    |
| H10  | 1115  | 5944 | 5993 | 54    |
| H16  | 2227  | 3282 | 4782 | 49    |
| H17A | 6805  | 6097 | 3251 | 52    |
| H17B | 6483  | 6764 | 3532 | 52    |
| H18A | 4623  | 7138 | 2730 | 60    |
| H18B | 4917  | 6464 | 2454 | 60    |
| H19A | 5859  | 7644 | 1743 | 69    |
| H19B | 7013  | 7508 | 2339 | 69    |
| H20A | 8007  | 7168 | 1509 | 77    |
| H20B | 7652  | 6441 | 2110 | 77    |
| H21A | 6299  | 6992 | 839  | 71    |
| H21B | 5830  | 6292 | 1447 | 71    |
| H22A | 8354  | 6396 | 728  | 100   |
| H22B | 7816  | 5694 | 1308 | 100   |
| H23A | 6646  | 6276 | -13  | 123   |
| H23B | 6194  | 5547 | 568  | 123   |
| H24A | 7641  | 5273 | -288 | 237   |
| H24B | 8397  | 5003 | 458  | 237   |
| H24C | 8863  | 5734 | -118 | 237   |
| H25A | -1456 | 3187 | 6430 | 51    |
| H25B | -1855 | 3886 | 6647 | 51    |
| H26A | 122   | 2780 | 7356 | 53    |
| H26B | 18    | 3530 | 7522 | 53    |
| H27A | -2318 | 3301 | 7855 | 53    |
| H27B | -2199 | 2551 | 7699 | 53    |
| H28A | -669  | 2834 | 8783 | 63    |
| H28B | -783  | 2068 | 8656 | 63    |
| H29A | -3195 | 2067 | 8907 | 82    |

|      |       |       |       |     |
|------|-------|-------|-------|-----|
| H29B | -3048 | 2818  | 9055  | 82  |
| H30A | -3174 | 1865  | 10126 | 101 |
| H30B | -1853 | 1475  | 9912  | 101 |
| H31A | -475  | 2332  | 9998  | 109 |
| H31B | -1326 | 2010  | 10709 | 109 |
| H32A | -2086 | 3342  | 9695  | 167 |
| H32B | -1118 | 3291  | 10353 | 167 |
| H32C | -2691 | 3035  | 10475 | 167 |
| H36  | 5855  | 810   | 1687  | 58  |
| H37  | 7028  | 22    | 1198  | 59  |
| H39  | 10597 | 444   | 1985  | 57  |
| H40  | 9488  | 1266  | 2397  | 56  |
| H41A | 9359  | -188  | 699   | 51  |
| H41B | 9215  | -835  | 1417  | 51  |
| H43  | 10311 | 837   | 409   | 64  |
| H44  | 11636 | 1734  | -422  | 68  |
| H45  | 14061 | 1643  | -424  | 66  |
| H46  | 15146 | 610   | 326   | 60  |
| H49  | 9846  | -1056 | 2471  | 55  |
| H50  | 10840 | -1804 | 3517  | 63  |
| H51  | 13268 | -2007 | 3629  | 69  |
| H52  | 14649 | -1490 | 2658  | 63  |
| H54A | 5479  | 4536  | 2478  | 73  |
| H54B | 5610  | 4731  | 1646  | 73  |
| H55A | 3280  | 4129  | 2429  | 67  |
| H55B | 3413  | 4333  | 1596  | 67  |
| H56A | 3287  | 5374  | 2354  | 95  |
| H56B | 3558  | 5603  | 1525  | 95  |
| H57B | 1204  | 5793  | 1629  | 106 |
| H57A | 1034  | 5036  | 2232  | 106 |
| H57C | 1303  | 5058  | 1438  | 106 |
| H58A | 5172  | 3681  | 1045  | 65  |
| H58B | 5828  | 2893  | 1376  | 65  |
| H59A | 3510  | 2753  | 2067  | 70  |
| H59B | 3050  | 3328  | 1342  | 70  |
| H60A | 4141  | 1969  | 1505  | 90  |
| H60B | 3739  | 2547  | 770   | 90  |
| H61A | 1432  | 2464  | 1062  | 147 |
| H61B | 1781  | 1950  | 1838  | 147 |
| H61C | 2047  | 1669  | 1179  | 147 |
| H62A | 8022  | 3122  | 1851  | 86  |
| H62B | 7926  | 3982  | 1591  | 86  |
| H63A | 8713  | 4068  | 2615  | 116 |
| H63B | 8194  | 3286  | 3058  | 116 |
| H64A | 10559 | 3551  | 2191  | 115 |
| H64B | 10039 | 2768  | 2631  | 115 |
| H65A | 11239 | 3788  | 3188  | 158 |
| H65B | 11820 | 2995  | 3263  | 158 |
| H65C | 10457 | 3099  | 3684  | 158 |
| H66A | 4705  | 2274  | 5034  | 65  |
| H66B | 3329  | 2056  | 4725  | 65  |
| H67A | 3575  | 855   | 5523  | 74  |
| H67B | 4926  | 1095  | 5845  | 74  |

|      |       |      |      |     |
|------|-------|------|------|-----|
| H68A | 2248  | 1714 | 5868 | 92  |
| H68B | 3603  | 1914 | 6219 | 92  |
| H69A | 1933  | 716  | 6736 | 148 |
| H69B | 2822  | 1115 | 7168 | 148 |
| H69C | 3559  | 546  | 6849 | 148 |
| H70A | 4978  | 747  | 3744 | 72  |
| H70B | 4210  | 555  | 4488 | 72  |
| H71A | 3243  | 1567 | 3264 | 104 |
| H71B | 2466  | 1336 | 4005 | 104 |
| H72A | 2167  | 150  | 3925 | 117 |
| H72B | 1417  | 748  | 3290 | 117 |
| H73A | 3143  | 681  | 2533 | 147 |
| H73B | 2687  | -127 | 2938 | 147 |
| H73C | 4076  | 179  | 3159 | 147 |
| H74A | 6758  | 904  | 4993 | 69  |
| H74B | 7372  | 1134 | 4214 | 69  |
| H75A | 7409  | 1995 | 5125 | 78  |
| H75B | 7910  | 2282 | 4327 | 78  |
| H76A | 9876  | 1754 | 4535 | 165 |
| H76B | 9608  | 1851 | 5274 | 165 |
| H77A | 10916 | 1004 | 5321 | 265 |
| H77B | 9511  | 722  | 5737 | 265 |
| H77C | 9783  | 624  | 4985 | 265 |

### Crystal structure determination of NDI-Pt-PTZ

Crystal Data for  $C_{77}H_{105}N_3O_4P_2PtS$  ( $M=1425.72$  g/mol): triclinic, space group P-1 (no. 2),  $a = 9.6512(8)$  Å,  $b = 19.5530(12)$  Å,  $c = 20.0708(7)$  Å,  $\alpha = 71.675(4)^\circ$ ,  $\beta = 89.523(4)^\circ$ ,  $\gamma = 88.863(6)^\circ$ ,  $V = 3594.8(4)$  Å<sup>3</sup>,  $Z = 2$ ,  $T = 100$  K,  $\mu(?) = 1.911$  mm<sup>-1</sup>,  $D_{calc} = 1.317$  g/cm<sup>3</sup>, 22160 reflections measured ( $3.404^\circ \leq 2\Theta \leq 40.29^\circ$ ), 7084 unique ( $R_{int} = 0.1700$ ,  $R_{sigma} = 0.1098$ ) which were used in all calculations. The final  $R_1$  was 0.1078 ( $I > 2\sigma(I)$ ) and  $wR_2$  was 0.3265 (all data).

### Additional experimental details

Single crystals suitable for diffraction experiments were obtained by slow evaporation from DCM. Single crystal diffraction data was collected at beamline I19 at Diamond Light Source.<sup>6-8</sup> A single crystals of **NDI-Pt-PTZ (3)** was taken from the mother liquor and placed in fomblin oil on a glass slide. A crystal was picked and mounted on a MiTeGen 100 µm microloop. The single crystal, in turn, was placed directly onto the Newport diffractometer at beamline I19. All full hemisphere was collected using three 130 ° omega scans, two 120 ° phi scans and one 240 ° phi scan with a 0.4 ° increment. Data was collected on a Newport diffractometer equipped with a Pilatus 300 K detector and an Oxford Cryosystems Cryostream to maintain the sample temperature at 100 K. Data was collected at 0.6889(1) Å. The data were processed using CryAlisPro<sup>9</sup> using a predetermined instrument model determined from a strongly diffracting reference crystal to enable more accurate determination of the orientation matrix used for integration of diffraction intensities. Data were corrected for absorption using empirical methods (SADABS) based on symmetry-equivalent reflections and measurements at different azimuthal angles.<sup>10-12</sup> Structure solution was achieved by direct methods and the crystal structure was refined using full-matrix least-squares against weighted  $F^2$  values using SHELXL<sup>13</sup> within Olex2.<sup>14</sup> Non-hydrogen atoms were refined anisotropically. Hydrogen atoms were placed in calculated positions, refined to idealized geometries (riding model) and assigned a fixed isotropic displacement parameter.

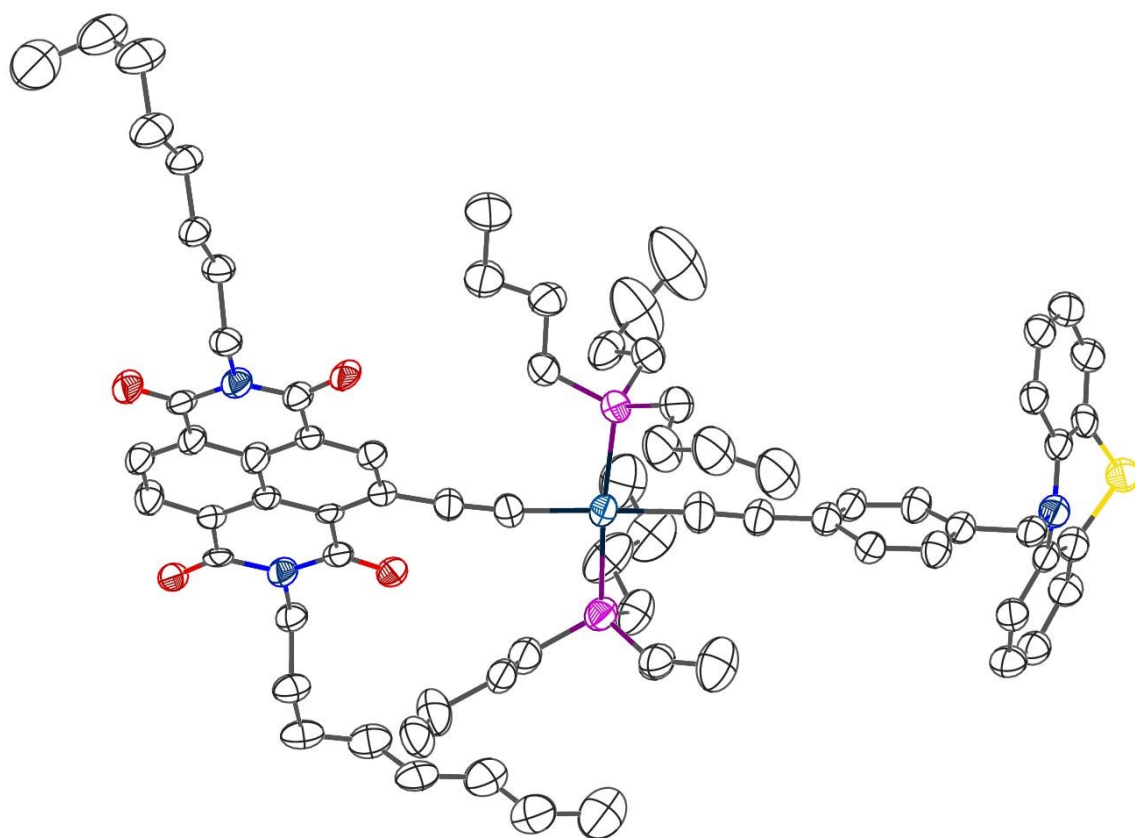

Fig.S18. The x-ray crystal structure of complex **3**, including the alkyl chains. The hydrogen atoms have been omitted for clarity.

## 7 References

- 1 K. Xiong and Y. Xiao, *Tetrahedron Lett.*, 2013, **54**, 3171–3175.
- 2 P. A. Scattergood, M. Delor, I. V. Sazanovich, O. V. Bouganov, S. A. Tikhomirov, A. S. Stasheuski, A. W. Parker, G. M. Greetham, M. Towrie, E. S. Davies, A. J. H. M. Meijer and J. A. Weinstein, *Dalt. Trans.*, 2014, **43**, 17677–17693.
- 3 Y. Liu, S. Jiang, K. Glusac, D. H. Powell, D. F. Anderson and K. S. Schanze, *J. Am. Chem. Soc.*, 2002, **124**, 12412–12413.
- 4 T. Cardolaccia, A. M. Funston, M. E. Kose, J. M. Keller, J. R. Miller and K. S. Schanze, *J. Phys. Chem. B*, 2007, **111**, 10871–10880.
- 5 K. Onitsuka, A. Shimizu, F. Takei and S. Takahashi, *J. Inorg. Organomet. Polym. Mater.*, 2009, **19**, 98–103.
- 6 H. Nowell, S. A. Barnett, K. E. Christensen, S. J. Teat and D. R. Allan, *J. Synchrotron Radiat.*, 2012, **19**, 435–441.
- 7 S. A. Barnett, H. Nowell, M. R. Warren, A. Wilcox and D. R. Allan, *Protein Pept. Lett.*, 2015, **23**, 211–216.
- 8 D. R. Allan, S. P. Collins, G. Evans, D. Hall, K. McAuley, R. L. Owen, T. Sorensen, C. C. Tang, F. von Delft, A. Wagner and H. Wilhelm, *Eur. Phys. J. Plus*, 2015, **130**, 1–20.
- 9 CrysAlisPRO, *Oxford Diffraction/Agilent Technol. UK Ltd*, Yarnton, England.
- 10 G. M. Sheldrick, *SADABS, Empirical Absorpt. Correct. program*, Univ. Göttingen, 1995, based on the methods of Blessing.
- 11 L. Krause, R. Herbst-Irmer, G. M. Sheldrick and D. Stalke, *J. Appl. Crystallogr.*, 2015, **48**, 3–10.
- 12 R. H. Blessing, *Acta Crystallogr. Sect. A Found. Adv.*, 1995, **A51**, 33–38.
- 13 G. M. Sheldrick, *Acta Crystallogr. Sect. C Struct. Chem.*, 2015, **71**, 3–8.
- 14 O. V. Dolomanov, L. J. Bourhis, R. J. Gildea, J. A. K. Howard and H. Puschmann, *J. Appl. Crystallogr.*, 2009, **42**, 339–341.
- 15 I. H. M. Van Stokkum, D. S. Larsen and R. Van Grondelle, *Biochim. Biophys. Acta - Bioenerg.*, 2004, **1657**, 82–104.
- 16 J. J. Snellenburg, S. P. Laptenok, R. Seger, K. M. Mullen and I. H. M. van Stokkum, *J. Stat. Softw.*, 2012, **49**.
- 17 P. Dedecker, *J. Chemom.*, 2014, **28**, 137–138.
